# Supplementary material
Source: HighWire-hosted journal article supplement (https://delf06.com/highwire/filestream/128017/field_highwire_adjunct_files/0/CARES_Annexes_CHN_Final.pdf)
Supplement: CARES_Annexes_CHN_Final.pdf [file CARES_Annexes_CHN_Final.pdf]

# 附录：江苏省老年人 流感项目调查问卷

# 附录一：筛查表

# 附录一：筛查表

## A. 筛查信息

筛查所需物资：一张画有圆形的纸

A1. 筛查日期：\_\_\_\_/\_\_\_\_/\_\_\_\_ (年/月/日)  
(自动填充)

A2. 调查员姓名：\_\_\_\_\_

A2a. 调查员编号：\_\_\_\_\_

A3. 招募城市：

- 苏州
- 盐城

A4. 招募地点或方式：

- 社区卫生服务中心
- 其它医疗机构
- 退休人员/老年人活动中心
- 社区招募
- 潜在研究对象家中
- 根据招募名单直接联系
- 经其他研究对象介绍直接联系
- 潜在研究对象直接联系本研究项目
- 其它，请注明：\_\_\_\_\_

A5. 潜在研究对象性别：

- 男
- 女

(调查员注意：可以在接触被筛查者前直接通过视觉判断性别后录入)

## B. 面对面调查

B1. 我们正在进行一项有关老年人健康的研究，了解每年有多少老年人得流感。我可以询问您一些问题以便判断您是否适合参与我们的项目吗？

- 可以 → 前往问题 B2
- 不可以 → 在 B1a 中记录原因并停止调查。

B1a. 记录原因，然后停止调查。

- 忙碌
- 其他原因导致时间不合适
- 感觉不适
- 有听力损伤
- 有其它原因导致的交流障碍
- 家庭成员拒绝

- 当地招募机构工作人员反对其参加  
 不感兴趣  
 其他原因, 请注明: \_\_\_\_\_

停止调查。被筛查者不符合纳入条件。请对被筛查者说: 谢谢您的参与。祝您一切顺利。

B2. 您的出生日期是? \_\_\_\_/\_\_\_\_/\_\_\_\_ (年/月/日)

B2a. 年龄 (自动换算)

如果 Ages  $\geq 60$  -  $\leq 89$  → 继续

如果 Ages  $< 60$  -  $> 89$  → 停止调查。不符合纳入者年龄条件。请对被筛查者说:

停止调查。被筛查者不符合纳入者条件。请对被筛查者说: 谢谢您的参与。我们希望寻找 60-89 岁的老年人。祝您一切顺利。

B3. 您的性别是?

- 男  
 女

B4. 您是否居住在[插入具体的研究地点]?

- 是 → 继续  
 否 → 停止调查。被筛查者不符合纳入条件。请对被筛查者说:

谢谢您的参与。我们希望寻找居住在本城市的成年人。

B4a. 未来两年您是否计划继续住在这里?

- 是 → 继续  
 否 → 停止调查。被筛查者不符合纳入条件。请对被筛查者说:

谢谢您的参与。我们希望寻找未来两年计划居住在[研究地点]的成年人。

B5. 回顾过去的一个月, 您认为自己总体健康状况是? [读出选项]

- 非常好  
 很好  
 不错  
 一般  
 很差

B6. 您是否听过流感疫苗? 成年人每年可以接种这种疫苗来减少感染流感的机会。

- 是 → 前往问题 B6a  
 否 → 前往问题 B7

B6a. 您是否接种过流感疫苗?

- 是 → 前往问题 B6b  
 否 → 前往问题 B7  
 不清楚 → 前往问题 B7

B6b. 在最近 5 年，您接种过多少次流感疫苗？

- 0 次 → 前往问题 B6e
- 1
- 2
- 3
- 4
- 5

如必要请记录:

- 不清楚 → 前往问题 B6e
- 拒绝回答 → 前往问题 B6e

B6c\_yr. 您最近一次接种流感疫苗是哪一年？

[注意: 从下拉菜单中选择]

年: \_\_\_\_\_ [选项: 2000-2015]

- 15 年或之前
- 不清楚
- 拒绝回答

B6c\_mo. 您最近一次接种流感疫苗是哪一月？

[注意: 从下拉菜单中选择]

月: \_\_\_\_\_ [选项: 一月-十二月]

- 不清楚
- 拒绝回答

(调查员注意: 当 B6c 答案为“不清楚”或接种日期在 7 个月内时，问题 B6d 出现。其它情况问题将继续至 B6e。)

B6d. 您是否在最近 6 个月内接种过流感疫苗？

- 是
- 否

B6e. 尽管非常罕见，但是一部分人会对流感疫苗产生不良反应。您是否遇到过这种情况？

- 是 → 前往问题 B6f
- 否 → 前往问题 B7

B6f. 您的不良反应是否严重到需要去看医生或寻求医疗服务？

- 是 → 前往问题 B6g
- 否 → 前往问题 B7

B6g. 您是否可以描述您所遭遇的不良反应以及令你寻求医疗服务的原因？

请记录: \_\_\_\_\_

B6h. 请调查员回答 (无需读出): 不良反应是否严重到威胁到生命或需要急救的程度?

是 → 前往排除声明。

否 → 继续调查。向项目统筹员咨询以确认 B6h 是否正确。

B7. “我将会说出三个事物。当我说完, 我希望您能重复它们。请记住它们, 因为我将会在几分钟之后请你说出它们。”<sup>1</sup>

[缓慢地说出下列词语, 每次间隔 1 秒钟]: “球, 车, 人。”

说: “请重复这三个词语。”

[请调查员回答: 老年人是否正确地重复出了三个词语?]

是 → 前往问题 B8

否 → 前往问题 B7a

B7a. [请调查员注意: 如果没有, 重复这三个词语。]

说: “我们再试一遍。三个事物为: “球, 车, 人。”

然后说: “请重复这三个词语。”

[请调查员回答: 老年人是否正确地重复出了这三个词语?]

是 → 前往问题 B8

否 → 前往问题 B7b

B7b. [请调查员注意: 如果没有, 重复这三个词语。]

说: “我们再试一遍。三个事物为: “球, 车, 人。”

然后说: “请重复这三个词语。”

[请调查员回答: 老年人是否正确地重复出了这三个词语?]

是 → 前往问题 B8

否 → 前往排除声明。

B8. 您是否对鸡蛋过敏?

是 → 前往问题 B8a

否 → 前往问题 B9

不清楚 → 前往问题 B8a

B8a. 您是否曾对鸡蛋有严重的过敏反应并需要看医生或寻求医疗服务?

是 → 前往排除声明。

否 → 继续

B9. 您是否有割伤或打针后流血不止的身体状况?

是 → 前往问题 B9a

否 → 前往问题 B10

不清楚 → 前往问题 B9a

B9a. 是否有医生曾告知您患有一种叫做血友病的疾病或者您患有凝血障碍或出血性疾病?

<sup>1</sup> Borson S. The mini-cog: a cognitive “vital signs” measure for dementia screening in multi-lingual elderly. Int J Geriatr Psychiatry 2000; 15(11):1021.

是 → 前往排除声明。

否 → 继续

B10. 你曾经有中风，肺栓塞和深静脉血栓这类疾病，而需要采取“血液稀释剂”或华法林等抗凝药物？[调查员注意：如果被问到，你可以说：“这些药物可以用来减少血凝块以及预防中风、肺动脉栓塞和深静脉血栓。”同时注意：华法林是最常用的药物，其它药物还包括达比加群、阿哌沙班以及利伐沙班。]

是 → 前往排除声明。

否 → 继续

B11. 您是否记得之前重复的三个词语？您能否全部重复出它们？

调查员：老年人正确重复出了几个词语？

0 → 前往排除声明。

1 → 继续

2 → 继续

3 → 继续

B12. 调查员注意：笔和一张画有圆形的纸将会提供给被筛查者以便进行画钟试验。说：“请画出一幅钟表的表盘，并添加相应的数字。”

调查员：钟表是否包含了所有的数字并且都在圆圈内？

是 → 继续

否 → 前往排除声明。

B12a. 说：“现在，请画出代表 11:10 的钟表指针。”

调查员：指针是否指向 11 和 2？[注意：指针的大小不重要。]

是 → 继续

否 → 前往排除声明。

B13. 您有一个我们可以用来和你联系的固定电话或者手机号码吗？

是 → 继续

否 → 前往排除声明。

B14. 感谢您回答我们的问题。我们认为您已经符合参与本研究的条件。您是否愿意了解更多关于参与本研究的情况？

是 → 前往知情同意表。

否 → 在 B14a 中记录原因并停止调查。

B14a. 记录原因，然后停止调查。

忙碌

其他原因导致时间不合适

感觉不适

听力损伤

其它原因导致的交流障碍

家庭成员拒绝

不感兴趣

其它原因，请注明：\_\_\_\_\_

B15. 知情同意书是否已取得研究对象的签名？

- 是  
 否

说：谢谢您的参与。祝您一切顺利。

**排除：**说：谢谢您回答我们的问题。很遗憾电脑只选取了一小部分老年人参与我们的项目，而您没有被选中。但是非常感谢您今天抽出时间与我谈话。



附录二：  
纳入者访谈表  
（第一部分）

## 附录二：纳入者访谈表（第一部分）

---

---

### A. 管理信息

A1. 纳入者访谈第一部分的纳入日期： \_\_\_\_/\_\_\_\_/\_\_\_\_（年/月/日）  
（自动填充）

A2. 调查员姓名： \_\_\_\_\_

A2a. 调查员编号： \_\_\_\_\_

A2b. [调查员注意：不需读出：纳入访谈是否与筛检在同一地方进行？]

是→ 前往问题 A3a

否→ 前往问题 A2c

A2c. 纳入地点：

- 社区卫生中心
- 其他医疗机构
- 退休人员/老年活动中心
- 社区招募
- 潜在研究对象的家中
- 其他，请注明：

### 受访者的联系方式：

首先，我们需要收集一些信息以便日后与您取得联系。我们不会与他人分享这些信息。

A3. 姓名和地址：

A3a. 姓名： \_\_\_\_\_

A3b. 地址/您现在居住的地方：

\_\_\_\_\_

\_\_\_\_\_

\_\_\_\_\_

A3c. 所住社区 [注意：根据筛检城市填写]：

(苏州)： [注意：从下拉菜单中选择]

[插入具体地址选项]

其他，请注明： \_\_\_\_\_

不清楚

拒绝回答

(盐城)： [注意：从下拉菜单中选择]

[插入具体地址选项]

- 其他, 请注明: \_\_\_\_\_  
 不清楚  
 拒绝回答

## 电话

A4. 请告诉我您最常使用的家庭电话或手机号码:

\_\_\_\_\_

A5. 请告诉我您的另一个号码 (您的或您家人的都可):

\_\_\_\_\_

A5a. 这是谁的电话号码? \_\_\_\_\_

A5b. 您与这个人是什么关系? \_\_\_\_\_

A6. 什么时间联系您比较合适? (勾选全部适用的选项)

- 上午 8:30-11:30  
 中午 11:30-14:30  
 下午 14:30-17:30  
 其他时间, 请注明: \_\_\_\_\_

## 互联网和电子邮箱

A7. 您在过去 30 天内是否使用过互联网? <sup>2</sup>

- 是 → 前往问题 A7a  
 否 → 前往问题 B1

A7a. 您是否使用互联网电子邮件?

- 是 → 前往问题 A7b  
 否 → 前往问题 B1

A7b. 电子邮箱地址: \_\_\_\_\_

- 不清楚  
 拒绝回答

---

---

## B. 人口学信息

B1. 您属于下列哪个民族? [大声读出选项]

- 汉族

---

<sup>2</sup> US BRFSS 2014 Questionnaire

- 非汉族
- 不清楚
- 拒绝回答

B2. 您完成的最高学历是？

- 未受教育
- 小学
- 初中
- 高中/中专
- 大专
- 本科及以上
- 不清楚
- 拒绝回答

B3. 您目前是…？（大声读出选项）

- 已婚
- 分居/离婚
- 丧偶
- 未婚
- 不清楚
- 拒绝回答

## C. 家庭信息

我希望询问一些有关您家庭以及一起居住的其他家庭成员的问题。

C1. 除了您，您家中还有多少人与您一起居住？包括任何一个在您家中过夜并且居住至少一个月的人。<sup>3</sup>

\_\_\_\_\_ 人

（编程注意：自动为下表填充 C1-1 行）

我希望现在可以询问与您一起居住的每个家庭成员的年龄以及与您关系。

|             | i. 年龄   | [如果年龄不详或者拒绝回答]                                                | ii. 与研究对象的关系                                                                                          |
|-------------|---------|---------------------------------------------------------------|-------------------------------------------------------------------------------------------------------|
| <b>C1a.</b> | _____ 岁 | <input type="checkbox"/> 不清楚<br><input type="checkbox"/> 拒绝回答 | <input type="checkbox"/> 配偶<br><input type="checkbox"/> 儿子（包括女婿）<br><input type="checkbox"/> 女儿（包括儿媳） |

<sup>3</sup> Adapted from “Background\_Que\_new design” Word document from Celine.

|                                        |         |                                                               |                                                                                                                                                                                                                                                                                                                                                                                                      |
|----------------------------------------|---------|---------------------------------------------------------------|------------------------------------------------------------------------------------------------------------------------------------------------------------------------------------------------------------------------------------------------------------------------------------------------------------------------------------------------------------------------------------------------------|
|                                        |         |                                                               | <input type="checkbox"/> 孙子/外孙<br><input type="checkbox"/> 孙女/外孙女<br><input type="checkbox"/> 堂亲/表亲<br><input type="checkbox"/> 其他家庭成员<br><input type="checkbox"/> 保姆<br><input type="checkbox"/> 租客<br><input type="checkbox"/> 其他非家庭成员<br><input type="checkbox"/> 上面未列出的其他，请注明：<br>_____                                                                                                          |
| <b>C1b.</b>                            | _____ 岁 | <input type="checkbox"/> 不清楚<br><input type="checkbox"/> 拒绝回答 | <input type="checkbox"/> 配偶<br><input type="checkbox"/> 儿子（包括女婿）<br><input type="checkbox"/> 女儿（包括儿媳）<br><input type="checkbox"/> 孙子/外孙<br><input type="checkbox"/> 孙女/外孙女<br><input type="checkbox"/> 堂亲/表亲<br><input type="checkbox"/> 其他家庭成员<br><input type="checkbox"/> 保姆<br><input type="checkbox"/> 租客<br><input type="checkbox"/> 其他非家庭成员<br><input type="checkbox"/> 上面未列出的其他，请注明：<br>_____ |
| <b>C1c</b> ___11 - 附加字段用以记录至多 12 个家庭成员 |         |                                                               |                                                                                                                                                                                                                                                                                                                                                                                                      |

C2. 您家有几间卧室？

- 1  
 2  
 3  
 4 及以上

C3. 您与几个人共用一间卧室？

- 0  
 1  
 2  
 3 及以上

## D. 健康及行动能力

现在，我希望询问您一些有关您目前健康及社会活动的问题。

D1. 您是否被医生或其他医务人员诊断患有持续至少 6 个月的疾病，例如糖尿病、哮喘、心脏病或者癌症？

- 是  
 否

D2. 您是否使用手杖、助行器或者轮椅帮助您行走？

- 是  
 否

D3. 您现在是否因视力不良而造成日常生活不便？<sup>4</sup>

- 是 → 前往问题 D3a  
 否 → 前往问题 D4

D3a. 您现在是否失明或者有即使戴眼镜都无法改善的严重的视力障碍？<sup>5</sup>

- 是  
 否

D4. 您现在是否因为听力不良而造成日常生活不便？<sup>6</sup>

- 是 → 前往问题 D4a  
 否 → 前往问题 D5

D4a. 您是否佩戴助听器？

- 是  
 否

D5. 您通常每周有多少天使用电话与他人交谈？<sup>7</sup>[大声读出选项]

- 每天  
 每周几次  
 每周一次  
 每月几次  
 至少每月一次  
 每月不到一次 → 前往问题 D5a

D5a. 您是否使用您的电话与他人联系？

- 使用电话 → 前往问题 D5b  
 不使用电话 → 前往问题 D5d

---

<sup>4</sup> Groningen Frailty Indicator

<sup>5</sup> US BRFSS 2014 Questionnaire

<sup>6</sup> Groningen Frailty Indicator

<sup>7</sup> Responses can be translated into “ability to use telephone” item from Lawton IADL Scale

D5b. 您是否向外拨打电话？

是

否

D5c. 您是否接听电话？

是→ 前往问题 D6

否→ 前往问题 D5d

D5d. 您的配偶或其他家庭成员是否愿意接听我们的电话？

是

否

D6. 这个项目我们需要您生病期间每天记录一下您是否出现发烧、咳嗽等症状，您能做到吗？

是→ 跳至 D7

否→ 跳至 D6a

D6a. 您的配偶或其他家庭成员能帮您每天记录症状？

是→ 跳至 D6b

否→ 跳至 D7

D6b. 能够帮您记录症状的家庭成员的姓名：\_\_\_\_\_

D6c. 此人与您的关系：\_\_\_\_\_

D7. 您每周会离开家外出几天？

0 天

1 天

2 天

3 天

4 天

5 天

6 天

7 天

D8. 您经常使用哪些交通方式前往约会或其他活动？<sup>8</sup> [勾选全部适用的选项.]

(调查员注意：展示卡片 D1)

我自己开车

家庭成员开车送我

朋友开车送我

我乘坐出租车 → 提问问题 D8a

---

<sup>8</sup> Responses can be translated into “mode of transportation” item from Lawton IADL Scale

- 我乘坐巴士或者其他公共交通工具 → 提问问题 D8b
- 我走一段路达到目的地
- 我骑自行车
- 我骑电动自行车
- 使用其他的交通工具

D8a. [如果是] 您是否可以自己安排乘坐出租车或者您需要别人帮助您安排出租车行程?

- 可以自己安排,
- 可以自己安排, 但有时需要帮助
- 可以自己安排, 但经常需要帮助
- 一直需要帮助

D8b. [如果是] 您是否可以独自乘坐交通工具或者您需要有人陪同您一起乘坐?

- 独自乘坐
- 可以独自乘坐, 但是有时需要有人陪同
- 可以独自乘坐, 但经常需要有人陪同
- 一直需要有人陪同

D9. [调查员注意: 是否能够测量身高和体重? ]

- 是 → 前往问题 D9a
- 否 → 前往问题 D10

D9a. 记录测量的身高(cm): \_\_\_\_\_

D9b. 记录测量的下肢长度, 右侧膝关节到地面的距离(cm):<sup>8</sup> \_\_\_\_\_

D9c. 记录测量的体重(kg): \_\_\_\_\_ → 前往 E 部分

D10. 您脱鞋之后有多高(cm)? \_\_\_\_\_

D11. 您的体重是(kg)? \_\_\_\_\_

---

## E. 结尾

E1. 请验证以下信息:  确认

姓名: [自动填充]

地址: [自动填充]

电话 #1: [自动填充]

备用电话 #1: [自动填充]



E2. 其他联系信息 1:

E2a. 姓名: \_\_\_\_\_

E2b. 电话号码: \_\_\_\_\_

E2c. 电子邮箱地址: \_\_\_\_\_

E2d. 与研究对象的关系: \_\_\_\_\_

E3. 其他联系信息 2:

E3a. 姓名: \_\_\_\_\_

E3b. 电话号码: \_\_\_\_\_

E3c. 电子邮箱地址: \_\_\_\_\_

E3d. 与研究对象的关系: \_\_\_\_\_

E4. 调查员注意: 决定是否继续纳入表第二部分的访谈或者另外安排时间完成纳入表第二部分。

继续纳入表第二部分

另外安排时间完成纳入表第二部分

E4a. 调查者: 点击 '随机化' 来决定参与者被纳入表 2A 还是 2B

进入 2A

进入 2B

E4b. 纳入日期 2: \_\_\_\_/\_\_\_\_/\_\_\_\_ (年/月/日)

E4c. 纳入时间 2: \_\_\_\_:\_\_\_\_ (24 小时制)

E4d. 地点\_\_\_\_\_

[调查员注意: 如果另外安排时间完成纳入表第二部分, 请说“我们完成了第一部分的问题。感谢您抽出时间与我谈话。我们会在[X]天内联系您提醒您有关下一次安排。”]

---

选项卡:

选项卡 D1: 交通工具选项

附录三：  
纳入者访谈表  
(第二部分)

## 附录三：纳入者访谈表（第二部分）

### 该部分流程

问卷第二部分包含两个版本，每名研究对象会随机分到其中一个版本。两个版本的问卷中有部分相同的问题，也各自包含一些针对特别内容展开的问题。总体来说，版本 A 围绕生活经历、社会经济状况和健康状况展开，版本 B 围绕功能状态和衰弱情况展开。

| 部分 | 纳入者访谈表 2A           | 纳入者访谈表 2B           |
|----|---------------------|---------------------|
| A  | 管理信息                | 管理信息                |
| I  | 功能状态                |                     |
| J  |                     | 功能状态扩展              |
| L  | 标准化简易精神状态检查 (SMMSE) | 标准化简易精神状态检查 (SMMSE) |
| B  | 生活史 (从童年到成年)        |                     |
| C  | 生活史 (老年)            | 生活经历 (老年)           |
| D  | 社会经济状况              | 社会经济状况              |
| E  | 社会经济状况扩展            |                     |
| F  |                     | 一般健康状况              |
| G  | 一般健康状况扩展            |                     |
| H  | 慢性疾病                | 慢性疾病                |
| K  | 知识、态度、行为 (KAP)      | 知识、态度、行为 (KAP)      |

### A. 管理信息（所有研究对象）

A1. 纳入者访谈表2A/B 的填写日期： \_\_\_\_/\_\_\_\_/\_\_\_\_ (年/月/日)  
(自动填写)

A2. 调查员姓名： \_\_\_\_\_

A2a. 调查员编号： \_\_\_\_\_

A3. 城市：

苏州

盐城

江苏省老年人流感项目

附录三：纳入者访谈表（第二部分）

1/55

A4.环境:

- 社区卫生服务中心
- 其它医疗机构
- 老年人活动中心
- 研究对象的家
- 其它, 请注明: \_\_\_\_\_

---

---

## I. 功能状态 (纳入者访谈表 2A 专用)<sup>9</sup>

我们来讨论一下自理和家务活动。您只需回想过去一个月来的生活。对每一个问题, 请告诉我您是独立完成还是需要帮助。帮助可以来自家人、朋友、护工或者护士。如果您过去一个月需要帮助才能完成这些活动, 请告诉我您需要帮助的频率是有时、经常、频繁或者一直需要。

### [出示卡片 I1]

|      |              | 可以独<br>自完成 | 有时<br>需要<br>帮助 | 经常<br>需要<br>帮助 | 频繁需<br>要帮助 | 一直<br>需要<br>帮助 |
|------|--------------|------------|----------------|----------------|------------|----------------|
| I1a. | 在自己家的几个房间里走动 | ○          | ○              | ○              | ○          | ○              |
| I1b. | 从坐着到起立       | ○          | ○              | ○              | ○          | ○              |
| I1c. | 上下厕所         | ○          | ○              | ○              | ○          | ○              |
| I1d. | 上下床          | ○          | ○              | ○              | ○          | ○              |
| I1e. | 在户外或家附近走动    | ○          | ○              | ○              | ○          | ○              |
| I1f. | 购买杂货         | ○          | ○              | ○              | ○          | ○              |
| I1g. | 爬楼梯          | ○          | ○              | ○              | ○          | ○              |
| I1h. | 自己淋浴或盆浴      | ○          | ○              | ○              | ○          | ○              |

---

<sup>9</sup> The functional status items in the following grid and featured on cards 1-3 are the same for both versions; version 2 includes an additional rating scale for all items. Taken together with other items in screening and enrollment part 1, we include items that cover those featured in the GARS and GFI. Sample references: GARS: Groningen Activity Restriction Scale. Saameijer et al. The Groningen Activity Restriction Scale for Measuring Disability: Its utility in International Comparisons. Am J Public Health 1994, 84 (8) 1270-1273. GFI: Groningen Frailty Indicator. Bielderma et al.: Multidimensional structure of the Groningen Frailty Indicator in community-dwelling older people. BMC Geriatrics 2013 13:86.

[出示卡片 I2]

|                                | 可以独立完成                | 有时需要帮助                | 经常需要帮助                | 频繁需要帮助                | 一直需要帮助                |
|--------------------------------|-----------------------|-----------------------|-----------------------|-----------------------|-----------------------|
| I2a. 穿脱衣服                      | <input type="radio"/> | <input type="radio"/> | <input type="radio"/> | <input type="radio"/> | <input type="radio"/> |
| I2b. 准备我的早餐或午餐                 | <input type="radio"/> | <input type="radio"/> | <input type="radio"/> | <input type="radio"/> | <input type="radio"/> |
| I2c. 自己吃饭                      | <input type="radio"/> | <input type="radio"/> | <input type="radio"/> | <input type="radio"/> | <input type="radio"/> |
| I2d. 洗脸洗手                      | <input type="radio"/> | <input type="radio"/> | <input type="radio"/> | <input type="radio"/> | <input type="radio"/> |
| I2e. 自己洗全身澡                    | <input type="radio"/> | <input type="radio"/> | <input type="radio"/> | <input type="radio"/> | <input type="radio"/> |
| I2f. 护理脚和脚趾甲                   | <input type="radio"/> | <input type="radio"/> | <input type="radio"/> | <input type="radio"/> | <input type="radio"/> |
| I2g. 上厕所过程无大小便失禁等意外情况（自如控制大小便） | <input type="radio"/> | <input type="radio"/> | <input type="radio"/> | <input type="radio"/> | <input type="radio"/> |

I2g.i. [如果 I2g = 有时需要帮助, 经常需要帮助, 频繁需要帮助, 一直需要帮助] 您是否偶尔有大便或小便失禁的情况?

- 仅小便  
 仅大便  
 两者都有

[出示卡片 I3]

|                      | 可以独立完成                | 有时需要帮助                | 经常需要帮助                | 频繁需要帮助                | 一直需要帮助                |
|----------------------|-----------------------|-----------------------|-----------------------|-----------------------|-----------------------|
| I3a. 洗熨衣服            | <input type="radio"/> | <input type="radio"/> | <input type="radio"/> | <input type="radio"/> | <input type="radio"/> |
| I3b. 铺床或换床单          | <input type="radio"/> | <input type="radio"/> | <input type="radio"/> | <input type="radio"/> | <input type="radio"/> |
| I3c. 做“轻松”家务如掸灰除尘和整理 | <input type="radio"/> | <input type="radio"/> | <input type="radio"/> | <input type="radio"/> | <input type="radio"/> |
| I3d. 做“繁重”家务如拖地和吸尘   | <input type="radio"/> | <input type="radio"/> | <input type="radio"/> | <input type="radio"/> | <input type="radio"/> |
| I3e. 按时吃药            | <input type="radio"/> | <input type="radio"/> | <input type="radio"/> | <input type="radio"/> | <input type="radio"/> |
| I3f. 缴付账单和自己管钱       | <input type="radio"/> | <input type="radio"/> | <input type="radio"/> | <input type="radio"/> | <input type="radio"/> |
| I3g. 准备晚餐            | <input type="radio"/> | <input type="radio"/> | <input type="radio"/> | <input type="radio"/> | <input type="radio"/> |

## J. 功能状态扩展（纳入者访谈表 2B 专用）

J1. 现在请回想一下您的整体健康水平。在过去一个月（30 天）内，您有多少天生病、受伤或者身体不舒服？<sup>10</sup>

\_\_\_ 天[如果 >0, 请继续回答 J1a]

J1a. 在您生病、受伤或是健康状态不佳的这些时间里，您有多少天（至少半天）需要卧床休息？

\_\_\_ 天

J2. 过去 30 天内，有多少天您感到心情不太好，比如悲伤、压抑、忧虑或焦躁？<sup>11</sup>

\_\_\_ 天

J3. 过去 30 天内，有多少天您感到非常健康并精力十足？<sup>12</sup>

\_\_\_ 天

**提示：**接下来，我想再问几个关于自理和家务这些活动的问题。请您回想过去一个月来的状况就可以了。对每一个问题，请告诉我您是独立完成还是需要帮助。帮助可以来自家人、朋友、护工或者护士。如果您可以独自完成，请回答完成时是不费力、有困难还是很吃力。如果需要帮助才能完成，请告诉我您是有时、经常、频繁或者一直需要。

[出示卡片 J4]<sup>13</sup>

|                   | 没有困难能独立完成             | 能独立完成，但有困难            | 能独立完成，但很吃力            | 有时需要帮助                | 经常需要帮助                | 频繁需要帮助                | 一直需要帮助                |
|-------------------|-----------------------|-----------------------|-----------------------|-----------------------|-----------------------|-----------------------|-----------------------|
| J4a. 在自己家的几个房间里走动 | <input type="radio"/> | <input type="radio"/> | <input type="radio"/> | <input type="radio"/> | <input type="radio"/> | <input type="radio"/> | <input type="radio"/> |
| J4b. 从坐着到起立       | <input type="radio"/> | <input type="radio"/> | <input type="radio"/> | <input type="radio"/> | <input type="radio"/> | <input type="radio"/> | <input type="radio"/> |
| J4c. 上下厕所         | <input type="radio"/> | <input type="radio"/> | <input type="radio"/> | <input type="radio"/> | <input type="radio"/> | <input type="radio"/> | <input type="radio"/> |
| J4d. 上下床          | <input type="radio"/> | <input type="radio"/> | <input type="radio"/> | <input type="radio"/> | <input type="radio"/> | <input type="radio"/> | <input type="radio"/> |
| J4e. 在户外或家附近走动    | <input type="radio"/> | <input type="radio"/> | <input type="radio"/> | <input type="radio"/> | <input type="radio"/> | <input type="radio"/> | <input type="radio"/> |
| J4f. 购买杂货         | <input type="radio"/> | <input type="radio"/> | <input type="radio"/> | <input type="radio"/> | <input type="radio"/> | <input type="radio"/> | <input type="radio"/> |
| J4g. 爬楼梯          | <input type="radio"/> | <input type="radio"/> | <input type="radio"/> | <input type="radio"/> | <input type="radio"/> | <input type="radio"/> | <input type="radio"/> |
| J4h. 自己淋浴或盆浴      | <input type="radio"/> | <input type="radio"/> | <input type="radio"/> | <input type="radio"/> | <input type="radio"/> | <input type="radio"/> | <input type="radio"/> |

<sup>10</sup> From US BRFSS 2014 Questionnaire

<sup>11</sup> From US BRFSS 2014 Questionnaire, but combines two mental health items.

<sup>12</sup> From US BRFSS 2014 Questionnaire

<sup>13</sup> This extended version incorporates scaling of difficulty for activities that can be done independently but still may be a challenge for the older person. This reflects scaling by Groningen Activity Restriction Scale (GARS) and includes all the items in this scale plus overlapping items with other prioritized indices.

[出示卡片 J5]

|                                | 没有困难能独立完成 | 能独立完成，但有困难 | 能独立完成，但很吃力 | 有时需要帮助 | 经常需要帮助 | 频繁需要帮助 | 一直需要帮助 |
|--------------------------------|-----------|------------|------------|--------|--------|--------|--------|
| J5a. 穿脱衣服                      | ○         | ○          | ○          | ○      | ○      | ○      | ○      |
| J5b. 准备我的早餐或午餐                 | ○         | ○          | ○          | ○      | ○      | ○      | ○      |
| J5c. 自己吃饭                      | ○         | ○          | ○          | ○      | ○      | ○      | ○      |
| J5d. 洗脸洗手                      | ○         | ○          | ○          | ○      | ○      | ○      | ○      |
| J5e. 自己洗全身澡                    | ○         | ○          | ○          | ○      | ○      | ○      | ○      |
| J5f. 护理脚和脚趾甲                   | ○         | ○          | ○          | ○      | ○      | ○      | ○      |
| J5g. 上厕所过程无大小便失禁等意外情况（自如控制大小便） | ○         | ○          | ○          | ○      | ○      | ○      | ○      |

J5g.i. [IF J5g =有时需要帮助, 经常需要帮助, 频繁需要帮助, 一直需要帮助]  
您是否有偶尔大便或者小便失控的情况?

- 仅小便  
 仅大便  
 两者都有

[出示卡片 J6]

|                      | 没有困难能独立完成 | 能独立完成，但有困难 | 能独立完成，但很吃力 | 有时需要帮助 | 经常需要帮助 | 频繁需要帮助 | 一直需要帮助 |
|----------------------|-----------|------------|------------|--------|--------|--------|--------|
| J6a. 洗熨衣服            | ○         | ○          | ○          | ○      | ○      | ○      | ○      |
| J6b. 铺床或换床单          | ○         | ○          | ○          | ○      | ○      | ○      | ○      |
| J6c. 做“轻松”家务如掸灰除尘和整理 | ○         | ○          | ○          | ○      | ○      | ○      | ○      |
| J6d. 做“繁重”家务如拖地和吸尘   | ○         | ○          | ○          | ○      | ○      | ○      | ○      |
| J6e. 按时吃药            | ○         | ○          | ○          | ○      | ○      | ○      | ○      |
| J6f. 缴付账单和自己管钱       | ○         | ○          | ○          | ○      | ○      | ○      | ○      |
| J6g. 准备晚餐            | ○         | ○          | ○          | ○      | ○      | ○      | ○      |

现在，请回想一下过去两周内的感受和和行为。以下每个问题，请您回答在过去两个礼拜内有几天有这样的感受或者行为。<sup>14</sup>

<sup>14</sup> From Center for Epidemiologic Studies Depression Scale (CES-D); items are from Radloff's original somatic symptoms scale; Chinese translation is available.

[出示卡片 J7]

|                                     | 根本没有或者少于1天            | 1-2天                  | 3-4 天                 | 5-7 天                 | 几乎每天                  |
|-------------------------------------|-----------------------|-----------------------|-----------------------|-----------------------|-----------------------|
| J7a 我为一些小事烦心                        | <input type="radio"/> | <input type="radio"/> | <input type="radio"/> | <input type="radio"/> | <input type="radio"/> |
| J7b 我不想吃东西，胃口不好                     | <input type="radio"/> | <input type="radio"/> | <input type="radio"/> | <input type="radio"/> | <input type="radio"/> |
| J7c 我弯腰、下蹲或屈膝有困难                    | <input type="radio"/> | <input type="radio"/> | <input type="radio"/> | <input type="radio"/> | <input type="radio"/> |
| J7d 我保持身体平衡有困难                      | <input type="radio"/> | <input type="radio"/> | <input type="radio"/> | <input type="radio"/> | <input type="radio"/> |
| J7e 我集中精力有困难                        | <input type="radio"/> | <input type="radio"/> | <input type="radio"/> | <input type="radio"/> | <input type="radio"/> |
| J7f 我睡不安稳                           | <input type="radio"/> | <input type="radio"/> | <input type="radio"/> | <input type="radio"/> | <input type="radio"/> |
| J7g 我比平时话少                          | <input type="radio"/> | <input type="radio"/> | <input type="radio"/> | <input type="radio"/> | <input type="radio"/> |
| J7h 我觉得很开心                          | <input type="radio"/> | <input type="radio"/> | <input type="radio"/> | <input type="radio"/> | <input type="radio"/> |
| J7i 我觉得做每件事都费力                      | <input type="radio"/> | <input type="radio"/> | <input type="radio"/> | <input type="radio"/> | <input type="radio"/> |
| J7j 我记不住事/我老忘事                      | <input type="radio"/> | <input type="radio"/> | <input type="radio"/> | <input type="radio"/> | <input type="radio"/> |
| J7k 我感觉日子过得没意思/生活空虚 * <sup>15</sup> | <input type="radio"/> | <input type="radio"/> | <input type="radio"/> | <input type="radio"/> | <input type="radio"/> |
| J7l 我想念身边有人陪伴 *                     | <input type="radio"/> | <input type="radio"/> | <input type="radio"/> | <input type="radio"/> | <input type="radio"/> |
| J7m 我感到孤单、没有人理我*                    | <input type="radio"/> | <input type="radio"/> | <input type="radio"/> | <input type="radio"/> | <input type="radio"/> |
| J7n 我感到情绪低落或悲伤*                     | <input type="radio"/> | <input type="radio"/> | <input type="radio"/> | <input type="radio"/> | <input type="radio"/> |
| J7o 我感到紧张或焦虑*                       | <input type="radio"/> | <input type="radio"/> | <input type="radio"/> | <input type="radio"/> | <input type="radio"/> |
| J7p 我能举起或拿起至少 5 公斤重的东西              | <input type="radio"/> | <input type="radio"/> | <input type="radio"/> | <input type="radio"/> | <input type="radio"/> |
| J7q 我能抬起胳膊到肩膀以上                     | <input type="radio"/> | <input type="radio"/> | <input type="radio"/> | <input type="radio"/> | <input type="radio"/> |
| J7r 我不想起床，提不起劲来过日子                  | <input type="radio"/> | <input type="radio"/> | <input type="radio"/> | <input type="radio"/> | <input type="radio"/> |
| J7s 我没有精力做想做的事                      | <input type="radio"/> | <input type="radio"/> | <input type="radio"/> | <input type="radio"/> | <input type="radio"/> |

**L. 标准化简易精神状态检查 (SMMSE) <sup>16</sup>**

接下来我会问您一些问题，有些比较简单，有些可能会有些难度，请您配合回答，感谢您的耐心。

<sup>15</sup> Items marked with \* are psychological items are from the GFI: Groningen Frailty Indicator. Bielderman et al.: Multidimensional structure of the Groningen Frailty Indicator in community-dwelling older people. BMC Geriatrics 2013 13:86.

<sup>16</sup> Molloy DW, Alemayehu E, Roberts R. Reliability of a standardized Mini-Mental State Examination compared with the traditional Mini-Mental state Examination. American Journal of Psychiatry, Vol. 14, 1991a, pp.102-105



|     | 问题                                                                                                   | 允许答题时间                                                          | 回答                                                                                                                                   |
|-----|------------------------------------------------------------------------------------------------------|-----------------------------------------------------------------|--------------------------------------------------------------------------------------------------------------------------------------|
| L1. | a. 今年是哪一年?                                                                                           | 10 秒                                                            | <input type="checkbox"/> 回答正确<br><input type="checkbox"/> 回答错误                                                                       |
|     | b. 现在是什么季节?                                                                                          | 10 秒                                                            | <input type="checkbox"/> 回答正确<br><input type="checkbox"/> 回答错误                                                                       |
|     | c. 现在是几月?                                                                                            | 10 秒                                                            | <input type="checkbox"/> 回答正确<br><input type="checkbox"/> 回答错误                                                                       |
|     | d. 今天几号?                                                                                             | 10 秒                                                            | <input type="checkbox"/> 回答正确<br><input type="checkbox"/> 回答错误                                                                       |
|     | e. 今天星期几?                                                                                            | 10 秒                                                            | <input type="checkbox"/> 回答正确<br><input type="checkbox"/> 回答错误                                                                       |
| L2. | a. 我们在哪个国家?                                                                                          | 10 秒                                                            | <input type="checkbox"/> 回答正确<br><input type="checkbox"/> 回答错误                                                                       |
|     | b. 我们在哪个省?                                                                                           | 10 秒                                                            | <input type="checkbox"/> 回答正确<br><input type="checkbox"/> 回答错误                                                                       |
|     | c. 我们在哪个城市/镇?                                                                                        | 10 秒                                                            | <input type="checkbox"/> 回答正确<br><input type="checkbox"/> 回答错误                                                                       |
|     | d. [如果在受访者家/老年人活动中心] - 这个活动中心/住家的街道地址是?<br>如果在社区卫生服务中心/医疗机构/研究办公室 - 这栋楼的名字是?                         | 10 秒                                                            | <input type="checkbox"/> 回答正确<br><input type="checkbox"/> 回答错误                                                                       |
|     | e. [如果在受访者家/老年人活动中心] - 我们在哪间房?<br>如果在社区卫生服务中心/医疗机构/研究办公室 - 我们在几楼?                                    | 10 秒                                                            | <input type="checkbox"/> 回答正确<br><input type="checkbox"/> 回答错误                                                                       |
| L3. | [提问者说]: 我会说出三样东西。我说完之后, 请您重复。几分钟后, 我会再次提问, 请您记好这三样东西。<br><br>请缓慢说出下面三个词 (每个词隔 1 秒):<br>苹果、报纸、火车, 请重复 | 20 秒 如对象不能重复说出三个物体的名字, 重复说出三个物体的名字最多 5 次直至对象能重复说出 (但只用第一次结果评分)。 | <input type="checkbox"/> 0 个正确<br><input type="checkbox"/> 1 个正确<br><input type="checkbox"/> 2 个正确<br><input type="checkbox"/> 3 个正确 |

|                                                                                              |                                                                              |      |                                                                                                                                                                                        |
|----------------------------------------------------------------------------------------------|------------------------------------------------------------------------------|------|----------------------------------------------------------------------------------------------------------------------------------------------------------------------------------------|
| [调查员注意：对于这个问题（L4），每一个在正确位置的数字得一分。<br>如果正确次序为“1, 3, 7, 2, 4”而研究对象说“1, 7, 3, 2, 4”，那么得3分。]     |                                                                              |      |                                                                                                                                                                                        |
| L4.                                                                                          | 请跟我重复4, 2, 7, 3, 1。现在, 请调转从后往前读出这些数字。<br>[调查者注意：正确答案为1, 3, 7, 2, 4。]         | 30 秒 | <input type="checkbox"/> 0分<br><input type="checkbox"/> 1分<br><input type="checkbox"/> 2分<br><input type="checkbox"/> 3分<br><input type="checkbox"/> 4分<br><input type="checkbox"/> 5分 |
| L5.                                                                                          | 之前请您记住的三样东西是什么?                                                              | 10 秒 | <input type="checkbox"/> 0个正确<br><input type="checkbox"/> 1个正确<br><input type="checkbox"/> 2个正确<br><input type="checkbox"/> 3个正确                                                       |
| L6.                                                                                          | [调查员：出示手表]<br>问：这是什么?                                                        | 10 秒 | <input type="checkbox"/> 回答正确<br><input type="checkbox"/> 回答错误                                                                                                                         |
| L7.                                                                                          | [调查员：出示纽扣 ]<br>问：这是什么?                                                       | 10 秒 | <input type="checkbox"/> 回答正确<br><input type="checkbox"/> 回答错误                                                                                                                         |
| L8.                                                                                          | 请跟我重复以下短语：四十四只石狮子。                                                           | 10 秒 | <input type="checkbox"/> 回答正确<br><input type="checkbox"/> 回答错误                                                                                                                         |
| L9.                                                                                          | 请读出这张纸上的字并且照做。<br>[调查员：出示一张纸，上面写着“举起双手”。如果受访者读出来后并没有举起双手，请重复最多三遍。只有举起双手才给分。] | 10 秒 | <input type="checkbox"/> 举起双手<br><input type="checkbox"/> 没有举起双手                                                                                                                       |
| L9a.                                                                                         | [调查员：对象是否能够看懂纸上的字?]                                                          |      | <input type="checkbox"/> 是<br><input type="checkbox"/> 否                                                                                                                               |
| L10.                                                                                         | 说出任意一个完整的句子.                                                                 | 30 秒 | <input type="checkbox"/> 说出完整句子<br><input type="checkbox"/> 没说出完整句子                                                                                                                    |
| 调查员：递给受访者需复制的图表、橡皮和铅笔。                                                                       |                                                                              |      |                                                                                                                                                                                        |
| L11.                                                                                         | 请复制这张图。<br>[调查员注意：允许多次尝试，等待受访者完成并交还。只有完全正确地复制了两个五边形及其中间的四边形才能得分。]            | 1分钟  | <input type="checkbox"/> 研究对象正确复制了图案（两个五边形中间有一个四边形）<br><input type="checkbox"/> 研究对象未能正确复制图案                                                                                           |
| [调查员问受访者惯用左手还是右手。 拿一张纸举在受访者跟前，说：用左/右手接过这张纸（非惯用手），用两只手将这张纸对折，然后放在地上。<br>[调查员注意：容许研究对象有30秒回答。] |                                                                              |      |                                                                                                                                                                                        |

|      |            |      |                                                                                                                                            |
|------|------------|------|--------------------------------------------------------------------------------------------------------------------------------------------|
| L12. | a. 纸正确拿在手中 | 30 秒 | <input type="checkbox"/> 正确把纸张拿在非惯用手手中                                                                                                     |
|      | b. 把纸张对折   |      | <input type="checkbox"/> 没有正确把纸张拿在不常用的手中                                                                                                   |
|      | c. 将纸张放在地上 |      | <input type="checkbox"/> 纸张对折<br><input type="checkbox"/> 纸张没有被对折<br><input type="checkbox"/> 纸张被放在地上<br><input type="checkbox"/> 纸张没有放在地上 |

L13.总分\_\_\_\_\_

调查员：如果分数低于 24 分，通知项目协调员并且根据培训材料中列出的程序运作。

## B. 生活史（从儿童到成人）（仅适用于纳入者访谈表 2A）

我们希望从您的童年开始，更多地了解您的生活。

B1 您的出生地点是[当前研究城市]？

- 是 → 跳至问题 B2  
 其它城市 → 跳至问题 B1a

B1a. 您出生在哪个省份：[从下拉菜单中选择]

北京市  
上海市  
湖北省  
云南省  
天津市  
江苏省  
湖南省  
西藏自治区  
河北省  
浙江省  
广东省  
陕西省  
山西省  
安徽省  
广西壮族自治区

- 甘肃省
- 内蒙古自治区
- 福建省
- 海南省
- 青海省
- 辽宁省
- 江西省
- 重庆市
- 宁夏回族自治区
- 吉林省
- 山东省
- 四川省
- 新疆维吾尔自治区
- 黑龙江省
- 河南省
- 贵州省
- 其他(不在中国内地), 请注明: \_\_\_\_\_
- 不清楚/拒绝回答

**B1b.** 您出生在哪个城市/乡镇?  
 \_\_\_\_\_ (如果不清楚/拒绝回答, 键入'99'.)

不清楚/拒绝回答

**B2.** 在您的成长过程中 (从出生至 17 岁), 您都住在同一个地方, 还是曾经搬到不同的城市?

- 一直在出生地成长 → 问题 B3
- 至少一次搬到不同的地方 → 问题 B2b

**B2a.** (如果 B2= 至少一次搬到不同的地方) 除了出生地外, 在您成长的过程中曾经在多少个不同地方生活过?

- 1 个
- 2 个
- 3 个
- 4 个
- 5 个或以上

如果 B2a<3 → 跳至 B2b

如果 B2a≥3, 请问: 从您出生到 17 岁, 生活了最长时间的两个地方是?

地点名称 #1

B2b. 省份名称（儿童时期）：[从下拉菜单中选择]

北京市  
上海市  
湖北省  
云南省  
天津市  
江苏省  
湖南省  
西藏自治区  
河北省  
浙江省  
广东省  
陕西省  
山西省  
安徽省  
广西壮族自治区  
甘肃省  
内蒙古自治区  
福建省  
海南省  
青海省  
辽宁省  
江西省  
重庆市  
宁夏回族自治区  
吉林省  
山东省  
四川省  
新疆维吾尔自治区  
黑龙江省  
河南省  
贵州省

- 其他(不在中国内地)，请注明：\_\_\_\_\_
- 不清楚/拒绝回答

B2b\_i\_省市/乡镇名称（儿童时期）：

不清楚/拒绝回答

地点名称 #2

B2c. 省份名称（儿童时期）： [从下拉菜单中选择]

北京市  
上海市  
湖北省  
云南省  
天津市  
江苏省  
湖南省  
西藏自治区  
河北省  
浙江省  
广东省  
陕西省  
山西省  
安徽省  
广西壮族自治区  
甘肃省  
内蒙古自治区  
福建省  
海南省  
青海省  
辽宁省  
江西省  
重庆市  
宁夏回族自治区  
吉林省  
山东省  
四川省  
新疆维吾尔自治区  
黑龙江省  
河南省  
贵州省

其他(不在中国内地)，请注明： \_\_\_\_\_

不清楚/拒绝回答

B2c\_i\_省市/乡镇名称（儿童时期）:

不清楚/拒绝回答

B3. 回想出生到 17 岁左右这段时期，您认为您的整体健康状况是...? [大声读出选项]<sup>17</sup>

- 非常好
- 很好
- 不错
- 一般
- 差

B4. 从您出生至 17 岁这段时期，您父亲的职业是什么？或者，您父亲从事何种工作？  
[调查员：选择所有适用答案]

- 专业技术人员
- 行政/管理人员
- 销售和服务人员
- 建筑、机械、生产、运输及相关人员
- 农、林、牧、渔业工人
- 军事、警察、安全
- 其他技工人员
- 其他非技工人员
- 家政人员
- 学生
- 无业
- 其他，请注明： \_\_\_\_\_

调查员参考表：

|                  |                                            |
|------------------|--------------------------------------------|
| 专业技术人员           | 医疗保健专业人士、教师、实验室技术人员、计算机技术人员、律师、政府工作人员、文职人员 |
| 行政/管理人员          | 经理、学校校长                                    |
| 销售和服务人员          | 零售店营业员、厨师、店主、美发师                           |
| 建筑、机械、生产、运输及相关人员 | 工厂工人、卡车司机                                  |
| 农、林、牧、渔业工人       | 农民、猎人、畜牧业工人、林业工人                           |
| 军事、警察、安全         | 安全部队、警察、保安                                 |
| 其他技工人员           | 铁匠、屠夫、裁缝、手工艺品制造商、石匠、泥瓦匠                    |
| 其他非技工人员          | 黄包车夫、矿工、清洁工、街头小贩、垃圾收集工、柴火/水收集工             |
| 家政人员             | 全职家政人员、看护工                                 |
| 学生               | 全日制或非全日制学生                                 |

<sup>17</sup> Lie et al. Soc Sci Med 120 (2014): 224-232. China Health and Retirement Longitudinal Study

## 成年后年轻时期的生活

现在，让我们来谈谈您成年后从 18 岁到 34 岁这段年轻时期的生活：

这段时期您曾在哪里居住过？（按时间先后顺序排序）

### 地点名称 #1

B5a. 省份名称 (成年后的年轻时期)：[从下拉菜单中选择]

北京市  
上海市  
湖北省  
云南省  
天津市  
江苏省  
湖南省  
西藏自治区  
河北省  
浙江省  
广东省  
陕西省  
山西省  
安徽省  
广西壮族自治区  
甘肃省  
内蒙古自治区  
福建省  
海南省  
青海省  
辽宁省  
江西省  
重庆市  
宁夏回族自治区  
吉林省  
山东省  
四川省  
新疆维吾尔自治区  
黑龙江省



河南省

贵州省

其他(非中国内地)，请注明：\_\_\_\_\_

不清楚/拒绝回答

B5a\_i\_省市/乡镇名称（成年后的年轻时期）：\_\_\_\_\_

（如果不清楚/拒绝回答，键入'99'。）

不清楚/拒绝回答

## 地点名称 #2

B5b. 省份名称（成年后的年轻时期）：[从下拉菜单中选择]

北京市

上海市

湖北省

云南省

天津市

江苏省

湖南省

西藏自治区

河北省

浙江省

广东省

陕西省

山西省

安徽省

广西壮族自治区

甘肃省

内蒙古自治区

福建省

海南省

青海省

辽宁省

江西省

重庆市

宁夏回族自治区

吉林省

山东省

四川省

新疆维吾尔自治区

黑龙江省

河南省

贵州省

其他(不在中国内地)，请注明：\_\_\_\_\_

不清楚/拒绝回答

B5b\_i. 省市/乡镇名称 (成年后的年轻时期): \_\_\_\_\_

(如果不清楚/拒绝回答，键入'99'.)

不清楚/拒绝回答

### 地点名称 #3

B5c. 省份名称 (成年后的年轻时期): [从下拉菜单中选择]

北京市

上海市

湖北省

云南省

天津市

江苏省

湖南省

西藏自治区

河北省

浙江省

广东省

陕西省

山西省

安徽省

广西壮族自治区

甘肃省

内蒙古自治区

福建省

海南省

青海省

辽宁省

江西省

重庆市

宁夏回族自治区

吉林省

山东省  
四川省  
新疆维吾尔自治区  
黑龙江省  
河南省  
贵州省

- 其他(非中国内地)，请注明：\_\_\_\_\_
- 不清楚/拒绝回答

B5c\_ i. 省市/乡镇名称 (成年后的年轻时期): \_\_\_\_\_  
(如果不清楚/拒绝回答，键入'99'。)

不清楚/拒绝回答

#### 地点名称 #4

B5d. 省份名称 (成年后的年轻时期): [从下拉菜单中选择]

北京市  
上海市  
湖北省  
云南省  
天津市  
江苏省  
湖南省  
西藏自治区  
河北省  
浙江省  
广东省  
陕西省  
山西省  
安徽省  
广西壮族自治区  
甘肃省  
内蒙古自治区  
福建省  
海南省  
青海省  
辽宁省  
江西省  
重庆市

宁夏回族自治区  
吉林省  
山东省  
四川省  
新疆维吾尔自治区  
黑龙江省  
河南省  
贵州省

其他(不在中国内地)，请注明：\_\_\_\_\_

不清楚/拒绝回答

B5d\_ i. 省市/乡镇名称 (成年后的年轻时期): \_\_\_\_\_

(如果不清楚/拒绝回答，键入'99'。)

不清楚/拒绝回答

#### 地点名称 #5

B5e. 省份名称 (成年后的年轻时期): [从下拉菜单中选择]

北京市  
上海市  
湖北省  
云南省  
天津市  
江苏省  
湖南省  
西藏自治区  
河北省  
浙江省  
广东省  
陕西省  
山西省  
安徽省  
广西壮族自治区  
甘肃省  
内蒙古自治区  
福建省  
海南省  
青海省  
辽宁省

江西省  
重庆市  
宁夏回族自治区  
吉林省  
山东省  
四川省  
新疆维吾尔自治区  
黑龙江省  
河南省  
贵州省

其他(不在中国内地)，请注明：\_\_\_\_\_

不清楚/拒绝回答

B5e\_ i. 省市/乡镇名称 (成年后的年轻时期): \_\_\_\_\_

(如果不清楚/拒绝回答，键入'99'。)

不清楚/拒绝回答

B5f. [调查员：研究对象列出了多少个地方?]

1 →跳至 B7

2 →跳至 B7

3 →跳至 B6a

4 →跳至 B6a

5 →跳至 B6a

B6a. 在您年轻时期（18-34岁）居住最长时间的两个地方是哪里？

[地区 1]: \_\_\_\_\_ [从下拉菜单中选择]

B6b. 在您年轻时期（18-34岁）居住最长时间的两个地方是哪里？

[地区 2]: \_\_\_\_\_ [从下拉菜单中选择]

B7. 您年轻时期（18-34岁）的职业是什么？或者，您从事哪种类型的工作？ [调查员：选择所有适用答案]

专业技术人员

行政/管理人员

销售和服务人员

建筑、机械、生产、运输及相关人员

农、林、牧、渔业工人

军事、警察、安全

其他技工人员

- 其他非技工人员
- 家政人员
- 无业
- 学生
- 其他，请注明： \_\_\_\_\_

现在，让我们来谈谈您的中年生活（35-59 岁）：

这段时间您曾在哪里居住过（按照时间顺序排序）？

**地点名称 #1**

B8a. 省份名称(中年时期)：[从下拉菜单中选择]

- 北京市
- 上海市
- 湖北省
- 云南省
- 天津市
- 江苏省
- 湖南省
- 西藏自治区
- 河北省
- 浙江省
- 广东省
- 陕西省
- 山西省
- 安徽省
- 广西壮族自治区
- 甘肃省
- 内蒙古自治区
- 福建省
- 海南省
- 青海省
- 辽宁省
- 江西省
- 重庆市
- 宁夏回族自治区
- 吉林省

山东省  
四川省  
新疆维吾尔自治区  
黑龙江省  
河南省  
贵州省

其他(不在中国内地)，请注明：\_\_\_\_\_

不清楚/拒绝回答

B8a\_i\_省市/乡镇名称 (中年时期): \_\_\_\_\_

(如果不清楚/拒绝回答，键入'99'.)

不清楚/拒绝回答

## 地点名称 #2

B8b. 省份名称 (中年时期): [从下拉菜单中选择]

北京市  
上海市  
湖北省  
云南省  
天津市  
江苏省  
湖南省  
西藏自治区  
河北省  
浙江省  
广东省  
陕西省  
山西省  
安徽省  
广西壮族自治区  
甘肃省  
内蒙古自治区  
福建省  
海南省  
青海省  
辽宁省  
江西省  
重庆市  
宁夏回族自治区

吉林省  
山东省  
四川省  
新疆维吾尔自治区  
黑龙江省  
河南省  
贵州省

- 其他(不在中国内地), 请注明: \_\_\_\_\_  
 不清楚/拒绝回答

B8b\_i. 省市/乡镇名称 (中年时期): \_\_\_\_\_  
(如果不清楚/拒绝回答, 键入'99'.)  
 不清楚/拒绝回答

### 地点名称 #3

B8c. 省份名称 (中年时期): [从下拉菜单中选择]

北京市  
上海市  
湖北省  
云南省  
天津市  
江苏省  
湖南省  
西藏自治区  
河北省  
浙江省  
广东省  
陕西省  
山西省  
安徽省  
广西壮族自治区  
甘肃省  
内蒙古自治区  
福建省  
海南省  
青海省  
辽宁省  
江西省



重庆市  
宁夏回族自治区  
吉林省  
山东省  
四川省  
新疆维吾尔自治区  
黑龙江省  
河南省  
贵州省

其他(非中国内地), 请注明: \_\_\_\_\_

不清楚/拒绝回答

B8c\_i. 省市/乡镇名称 (中年时期): \_\_\_\_\_

(如果不清楚/拒绝回答, 键入'99'.)

不清楚/拒绝回答

#### 地点名称 #4

B8d. 省份名称 (中年时期): [从下拉菜单中选择]

北京市  
上海市  
湖北省  
云南省  
天津市  
江苏省  
湖南省  
西藏自治区  
河北省  
浙江省  
广东省  
陕西省  
山西省  
安徽省  
广西壮族自治区  
甘肃省  
内蒙古自治区  
福建省  
海南省  
青海省

辽宁省  
江西省  
重庆市  
宁夏回族自治区  
吉林省  
山东省  
四川省  
新疆维吾尔自治区  
黑龙江省  
河南省  
贵州省

- 其他(非中国内地), 请注明: \_\_\_\_\_  
 不清楚/拒绝回答

B8d\_i. 省市/乡镇名称 (中年时期): \_\_\_\_\_  
(如果不清楚/拒绝回答, 键入'99'.)  
 不清楚/拒绝回答

#### 地点名称 #5

B8e. 省份名称 (中年时期): [从下拉菜单中选择]

北京市  
上海市  
湖北省  
云南省  
天津市  
江苏省  
湖南省  
西藏自治区  
河北省  
浙江省  
广东省  
陕西省  
山西省  
安徽省  
广西壮族自治区  
甘肃省  
内蒙古自治区  
福建省

海南省  
青海省  
辽宁省  
江西省  
重庆市  
宁夏回族自治区  
吉林省  
山东省  
四川省  
新疆维吾尔自治区  
黑龙江省  
河南省  
贵州省

- 其他(非中国内地)，请注明：\_\_\_\_\_
- 不清楚/拒绝回答

B8e\_i. 省市/乡镇名称（中年时期）：\_\_\_\_\_

（如果不清楚/拒绝回答，键入'99'。）

- 不清楚/拒绝回答

B8f. [调查员：研究对象列出多少个地方?]

- 1 → 跳至 B10
- 2 → 跳至 B10
- 3 → 跳至 B9a.
- 4 → 跳至 B9a.
- 5 → 跳至 B9a.

B9a. 您中年时期（35-59岁）居住最长时间的两个地方是哪里？

[地点 1]：\_\_\_\_\_ [从下拉菜单中选择]

B9b. 您中年时期（35-59岁）居住最长时间的两个地方是哪里？

[地点 2]：\_\_\_\_\_ [从下拉菜单中选择]

B10. 您中年时期（35-59岁）职业是什么？或者，从事哪种类型的工作？ [调查员：选择所有适用答案]

- 专业技术人员
- 行政/管理人员
- 销售和服务人员
- 建筑、机械、生产、运输及相关人员

- 农、林、牧、渔业工人
- 军事、警察、安全
- 其他技工人员
- 其他非技工人员
- 家政人员
- 无业
- 学生
- 其他，请注明： \_\_\_\_\_

---

## C. 老年生活经历（所有研究对象）

现在让我们来谈谈您 60 岁之后的生活。

C1. 您 60 岁以后都居住在[目前研究城市]吗？

- 60 岁之后都居住在目前研究城市 → 跳至问题 C2
- 居住超过一个地方 → 跳至问题 C1a

C1a. 60 岁之后，除了现在居住的城市之外，您还在哪些地方居住过（按照时间顺序排序）？

### 地点名称 #1

C1a. 省份名称 (老年时期)：[从下拉菜单中选择]

北京市  
上海市  
湖北省  
云南省  
天津市  
江苏省  
湖南省  
西藏自治区  
河北省  
浙江省  
广东省  
陕西省  
山西省  
安徽省  
广西壮族自治区

甘肃省  
内蒙古自治区  
福建省  
海南省  
青海省  
辽宁省  
江西省  
重庆市  
宁夏回族自治区  
吉林省  
山东省  
四川省  
新疆维吾尔自治区  
黑龙江省  
河南省  
贵州省

其他(不在中国内地)，请注明： \_\_\_\_\_

不清楚/拒绝回答

C1a\_i\_省市/乡镇名称 (老年时期): \_\_\_\_\_

(如果不清楚/拒绝回答，键入'99'.)

不清楚/拒绝回答

## 地点名称 #2

C1b. 省份名称 (老年时期): [从下拉菜单中选择]

北京市  
上海市  
湖北省  
云南省  
天津市  
江苏省  
湖南省  
西藏自治区  
河北省  
浙江省  
广东省  
陕西省  
山西省

安徽省  
广西壮族自治区  
甘肃省  
内蒙古自治区  
福建省  
海南省  
青海省  
辽宁省  
江西省  
重庆市  
宁夏回族自治区  
吉林省  
山东省  
四川省  
新疆维吾尔自治区  
黑龙江省  
河南省  
贵州省

其他(不在中国内地), 请注明: \_\_\_\_\_

不清楚/拒绝回答

C1b\_ i. 省市/乡镇名称 (老年时期): \_\_\_\_\_

(如果不清楚/拒绝回答, 键入'99'.)

不清楚/拒绝回答

### 地点名称 #3

C1c. 省份名称 (老年时期): [从下拉菜单中选择]

北京市  
上海市  
湖北省  
云南省  
天津市  
江苏省  
湖南省  
西藏自治区  
河北省  
浙江省  
广东省

陕西省  
山西省  
安徽省  
广西壮族自治区  
甘肃省  
内蒙古自治区  
福建省  
海南省  
青海省  
辽宁省  
江西省  
重庆市  
宁夏回族自治区  
吉林省  
山东省  
四川省  
新疆维吾尔自治区  
黑龙江省  
河南省  
贵州省

其他(不在中国内地), 请注明: \_\_\_\_\_

不清楚/拒绝回答

C1c\_i. 省市/乡镇名称 (老年时期): \_\_\_\_\_

(如果不清楚/拒绝回答, 键入'99'.)

不清楚/拒绝回答

#### 地点名称 #4

C1d. 省份名称 (老年时期): [从下拉菜单中选择]

北京市  
上海市  
湖北省  
云南省  
天津市  
江苏省  
湖南省  
西藏自治区  
河北省

浙江省  
广东省  
陕西省  
山西省  
安徽省  
广西壮族自治区  
甘肃省  
内蒙古自治区  
福建省  
海南省  
青海省  
辽宁省  
江西省  
重庆市  
宁夏回族自治区  
吉林省  
山东省  
四川省  
新疆维吾尔自治区  
黑龙江省  
河南省  
贵州省

其他(不在中国内地), 请注明: \_\_\_\_\_

不清楚/拒绝回答

C1d\_ i. 省市/乡镇名称 (老年时期): \_\_\_\_\_

(如果不清楚/拒绝回答, 键入'99'。

不清楚/拒绝回答

#### 地点名称 #5

C1e. 省份名称 (老年时期): [从下拉菜单中选择]

北京市  
上海市  
湖北省  
云南省  
天津市  
江苏省  
湖南省  
西藏自治区



河北省  
浙江省  
广东省  
陕西省  
山西省  
安徽省  
广西壮族自治区  
甘肃省  
内蒙古自治区  
福建省  
海南省  
青海省  
辽宁省  
江西省  
重庆市  
宁夏回族自治区  
吉林省  
山东省  
四川省  
新疆维吾尔自治区  
黑龙江省  
河南省  
贵州省

- 其他(不在中国内地)，请注明：\_\_\_\_\_
- 不清楚/拒绝回答

C1e\_ i. 省市/乡镇名称 (老年时期): \_\_\_\_\_

(如果不清楚/拒绝回答，键入'99'。)

- 不清楚/拒绝回答

C1f. [调查员：研究对象列出了多少个地方?]

- 1 → 跳至 C3
- 2 → 跳至 C3
- 3 → 跳至 C2a.
- 4 → 跳至 C2a.
- 5 → 跳至 C2a.

C2a. 60岁之后您居住最长时间的两个地方是哪里?

[地区 1]: \_\_\_\_\_ [从下拉菜单中选择]

C2b. 60 岁之后您居住最长时间的两个地方是哪里?

[地区 2]: \_\_\_\_\_ [从下拉菜单中选择]

C3. 您现在全职工作，兼职工作或者已退休?

- 已退休 → 跳至 *问题 C4*
- 没有工作并且也不属于退休 → 跳至 *问题 C4*
- 兼职工作 → 跳至 *问题 C3a*
- 全职工作 → 跳至 *问题 C3a*

C3a.您现在的工作是什么类型? [调查员: 选择所有适用答案]

- 专业技术人员
- 行政/管理人员
- 销售和服务人员
- 建筑、机械、生产、运输及相关人员
- 农、林、牧、渔业工人
- 军事、警察、安全
- 其他技工人员
- 其他非技工人员
- 家政人员
- 学生
- 其他, 请注明: \_\_\_\_\_

C3b. 您现在每周工作多少小时? \_\_\_

C4. 您现在有孩子吗?

- 没有 → 跳至 *问题 C5*
- 有 → 跳至 *问题 C4a*

C4a. 您现在有多少个小孩?

- 1
- 2
- 3
- 4
- 5
- 6
- 7
- 8
- 9
- 10 或以上

C4b. 您现在有多少个孩子生活在这个城市?

- 0
- 1
- 2

- 3
- 4
- 5
- 6
- 7
- 8
- 9
- 10 或以上

C5. 在这个城市，您是否会和家人（包括兄弟姐妹、子女、外甥外甥女、侄子侄女）每周至少见面一次并一起聊天？

- 没有 → 跳至 *问题 C6*
- 有 → 跳至 *问题 C5a*

C5a. 您每周大概和多少位家人见面聊天？

- 0
- 1
- 2
- 3
- 4
- 5
- 6
- 7
- 8
- 9
- 10 或以上

C6. 在这个城市，您是否会和朋友每周至少见面一次并一起聊天？

- 否 → 跳至 *问题 C7*
- 是 → 跳至 *问题 C6a*

C6a. 您每周大概和多少位朋友见面聊天？

- 0
- 1
- 2
- 3
- 4
- 5
- 6
- 7
- 8
- 9
- 10 或以上

C7. 以下问题与您现在的日常活动有关。下面的每一项活动，如果您在过去 12 个月里面做过，请告诉我们。<sup>18</sup> [展示卡片 C7]<sup>19</sup>

|                                                          |                       |                       | [如果曾经做过该项活动] 做该项活动的频率<br>[注意：曾经做过该活动才需要填写频率] |                       |                       |                       |                       |                       |
|----------------------------------------------------------|-----------------------|-----------------------|----------------------------------------------|-----------------------|-----------------------|-----------------------|-----------------------|-----------------------|
|                                                          | 在过去的 12 个月里有          | 在过去的 12 个月里没有         | 每天                                           | 一周几次                  | 一周一次                  | 一个月几次                 | 一个月至少一次               | 一个月少于一次               |
| C7a. 照看或照顾小孩                                             | <input type="radio"/> | <input type="radio"/> | <input type="radio"/>                        | <input type="radio"/> | <input type="radio"/> | <input type="radio"/> | <input type="radio"/> | <input type="radio"/> |
| C7b. 和朋友或家人打麻将、扑克或玩其他棋牌类游戏，例如中国象棋、国际象棋、围棋等 <sup>20</sup> | <input type="radio"/> | <input type="radio"/> | <input type="radio"/>                        | <input type="radio"/> | <input type="radio"/> | <input type="radio"/> | <input type="radio"/> | <input type="radio"/> |
| C7c. 体力活动，例如打太极、园艺，或者步行至少 20 分钟 <sup>21</sup>            | <input type="radio"/> | <input type="radio"/> | <input type="radio"/>                        | <input type="radio"/> | <input type="radio"/> | <input type="radio"/> | <input type="radio"/> | <input type="radio"/> |
| C7d. 烤面包/蛋糕或做大餐                                          | <input type="radio"/> | <input type="radio"/> | <input type="radio"/>                        | <input type="radio"/> | <input type="radio"/> | <input type="radio"/> | <input type="radio"/> | <input type="radio"/> |
| C7e. 照顾生病或残疾的家人或朋友                                       | <input type="radio"/> | <input type="radio"/> | <input type="radio"/>                        | <input type="radio"/> | <input type="radio"/> | <input type="radio"/> | <input type="radio"/> | <input type="radio"/> |
| C7f. 和孙子孙女或其他小孩进行一起活动                                    | <input type="radio"/> | <input type="radio"/> | <input type="radio"/>                        | <input type="radio"/> | <input type="radio"/> | <input type="radio"/> | <input type="radio"/> | <input type="radio"/> |
| C7g. 去过卖活禽的市场                                            | <input type="radio"/> | <input type="radio"/> | <input type="radio"/>                        | <input type="radio"/> | <input type="radio"/> | <input type="radio"/> | <input type="radio"/> | <input type="radio"/> |

## D. 社会经济状况（所有研究对象）

D1. 过去 12 个月，您的总个人年收入，请在以下选项中选择符合的一项。（取出卡片 D1）

<10,000 元

<sup>18</sup> Unless otherwise noted, all of these activities and the response options are from NIA Health Retirement Study; some wording changes were made to make them culturally appropriate.

<sup>19</sup> Unless otherwise noted, all of these activities and the response options are from NIA Health Retirement Study; some wording changes were made to make them culturally appropriate.

<sup>20</sup> Similar group social activity items are within US BRFSS 2014 Questionnaire. Responses can also be translated into Frailty Phenotype item.

<sup>21</sup> 根据美国 BRFSS 2014 的问卷进行改编，回答也被翻译为对应类型的项目。

- 10,000- 29,000 元
  - 30,000- 39,000 元
  - 40,000- 49,000 元
  - 50,000- 100,000 元
  - ≥100,000 元
  - 不清楚
  - 拒绝回答
- 
- 

## E. 社会经济状况（扩展）（纳入者访谈表 2A 专用）

E1. 过去 12 个月，您家中所有人的年总收入，请在以下选项中选择符合的一项。（取出卡片 E1）

- <10,000 元
- 10,000- 29,000 元
- 30,000- 39,000 元
- 40,000- 49,000 元
- 50,000- 100,000 元
- ≥100,000 元
- 不清楚
- 拒绝回答

E2. 您现在居住的房子或公寓是归您或者您的家人所有还是租用？

- 您或您的家人拥有 → 跳至问题 E2a
- 租用 → 跳至问题 E3
- 不清楚 → 跳至问题 E3
- 拒绝回答 → 跳至问题 E3

E2a. 除了您目前住的这套房，您或您的家人是否还有其它的房产？

- 没有
- 有
- 不清楚
- 拒绝回答

E3. 在过去的 12 个月里面，您是否因为费用的原因在需要看病或寻求医疗服务的情况下没能去看医生或者获得所需的服务？<sup>22</sup>

- 没有
- 有
- 拒绝回答

---

<sup>22</sup> 美国疾病预防控制中心 BRFSS 调查

E4. 支付家庭日常开销，如房租、食物以及其他每月账单的困难程度，对于您来说是...

<sup>23</sup>[大声读出选项]

- 完全没有困难
- 不是很困难
- 有一点困难
- 很困难
- 极其困难

E5. 您家有以下哪几样家电？ [展示选项卡 E5] <sup>24</sup>（选择所有适用选项）

- 电视
- 冰箱
- 洗衣机
- 洗碗机
- 电话
- 汽车
- 自行车
- 电动自行车
- 收音机
- 电脑
- 空调
- 电风扇
- 其他家电，请注明： \_\_\_\_\_
- 以上都没有
- 不清楚
- 拒绝回答

E6. 请您想象一条有 9 层台阶的梯子。 [取出卡片 E6]

在梯子最高第 9 层的是在你们城市中最富有的家庭，拥有最多的钱，接受最好的教育，做着最受人尊重的工作。而在梯子最低第 1 层的是在你们城市中最贫穷的家庭，有最少钱，接受最差的教育，做着最不受人尊重的工作或者连工作都没有。1 是最低，9 是最高，请您从数字 1-9 中选择一个代表您的家庭在梯子上的位置。<sup>25</sup>

- 9
- 8
- 7
- 6
- 5
- 4
- 3

---

<sup>23</sup> 来自 Campbell A., Converse, P. E., & Rodgers, W. L. (1976). *The quality of American life: Perceptions, evaluations, and satisfactions*. New York: Russell Sage Foundation. 也是 2006-2010 健康与退休研究的一部分。措辞稍微有点变化。类似美国疾病预防控制中心 BRFSS 项目，修改了选项的金额。

<sup>24</sup> 高端家电评估参考国际财富指数调查，适用于中等至高收入国家。

<sup>25</sup> Standardized single-item subjective social status (SSS) measure. *MacArthur Scale of Subjective Social Status*. (1999)

- 2
- 1
- 不清楚
- 拒绝回答

---

---

## F. 一般健康状况简述（纳入者访谈表 2B 专用）

接下来，我们想了解关于您健康状况的问题。

F1. 回想过去的一个月，您认为您总体健康状况是...？ [大声读出选项]

- 非常好
- 很好
- 不错
- 一般
- 差

F2. 您现在是否抽烟，包括香烟、雪茄或烟斗？<sup>26</sup>

- 否 → 跳至 F3
- 是 → 跳至 F2a
- 拒绝回答

F2a. 您吸烟多少年了  
\_\_\_\_\_ 年

F2b. 您每天吸多少支烟？<sup>27</sup>  
\_\_\_\_\_ 支/天

F3. 您曾经吸烟吗？<sup>9</sup>

- 否 → 跳至 H 部分
- 是 → 跳至 F3a
- 拒绝回答

F3a. 您哪一年戒烟的？  
\_\_\_\_\_ 年

F3b. 您曾经吸烟多少年？  
\_\_\_\_\_ 年

---

<sup>26</sup> Modified from Thompson et al. (2011). The Pregnancy and Influenza Project: design of an observational case-cohort study to evaluate influenza burden and vaccine effectiveness among pregnant women and their infants. American Journal of Obstetrics and Gynecology, 204(6 Suppl 1), S69-76.

<sup>27</sup> Modified from Thompson et al. (2011). The Pregnancy and Influenza Project: design of an observational case-cohort study to evaluate influenza burden and vaccine effectiveness among pregnant women and their infants. American Journal of Obstetrics and Gynecology, 204(6 Suppl 1), S69-76.

F3c. 您曾经每天吸多少支烟?

\_\_\_\_\_支/天

---

---

## G. 一般健康状况扩展（纳入者访谈表 2A 专用）

接下来，我们想了解关于您健康状况的问题。

G1. 回想过去的一个月，您认为您总体健康状况是...? [大声读出选项]

- 非常好
- 很好
- 不错
- 一般
- 差

G2. 现在评价一下您今天的健康状况。使用这把标尺 [取出卡片 G2]，100 表示您觉得自己最好的健康状况，0 表示您觉得自己最差的健康状况。请您在标尺上打“X”表示过去 24 小时您的健康状况。<sup>28</sup>

\_\_\_\_\_（0=最差的健康状况; 100=最好的健康状况）

---

<sup>28</sup> Visual analogue scale from EQ-5D.



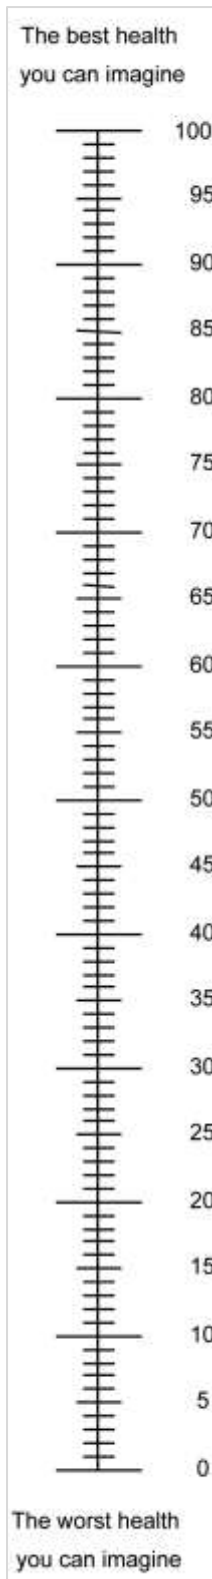

G3.您现在是否吸烟，包括香烟、雪茄或烟斗？<sup>29</sup>

- 否 → 跳至 G4  
 是 → 跳至 G3a  
 拒绝回答 → 跳至 G5

G3a. 您吸烟多少年了？  
\_\_\_\_\_ 年

G3b. 您每天吸多少支烟？  
\_\_\_\_\_ 支/天

G4. 您曾经吸烟吗？<sup>30</sup>

- 否 → 跳至问题 G5  
 是 → 跳至问题 4a  
 拒绝回答

G4a. 您哪一年戒烟的？  
\_\_\_\_\_ 年

G4b. 您曾经吸烟多少年？  
\_\_\_\_\_ 年

G4c. 您曾经每天吸多少支烟？  
\_\_\_\_\_ 支/天

G5. 您家里有谁曾经吸过烟吗？

- 没有 → 跳至 G6  
 有 → 跳至 G5a  
 拒绝回答

[调查员注意：这个问题应包括被调查对象、同住的家庭成员及所有访客。]

G5a. 吸烟者在您家中吸烟的频率是？ [大声读出选项]

- 每天一次  
 每周一次  
 每月一次  
 少于每月一次  
 拒绝回答

---

<sup>29</sup> Modified from Thompson et al. (2011). The Pregnancy and Influenza Project: design of an observational case-cohort study to evaluate influenza burden and vaccine effectiveness among pregnant women and their infants. American Journal of Obstetrics and Gynecology, 204(6 Suppl 1), S69-76.

<sup>30</sup> Modified from Thompson et al. (2011). The Pregnancy and Influenza Project: design of an observational case-cohort study to evaluate influenza burden and vaccine effectiveness among pregnant women and their infants. American Journal of Obstetrics and Gynecology, 204(6 Suppl 1), S69-76.

G6. 接下来我要问您关于肺炎疫苗的问题。人在50或60岁后会接种一到两次肺炎疫苗。它与流感疫苗不同。您听过肺炎疫苗吗？

没有→跳至 H1

有→跳至 G6a

G6a. 您注射过肺炎疫苗吗？

没有

有

不清楚

---

---

## H. 慢性疾病（所有研究对象都需回答）<sup>31</sup>

现在我会问你一些有关基本健康情况的问题。你曾经被医生诊断有以下任何疾病吗？请回答“有”、“没有”或者“不确定”。

H1. 心脏方面的疾病，包括心脏病发作、充血性心脏衰竭、心绞痛或冠心病

没有

有→ 跳至问题 H1a

不清楚

H1a. 具体说明心脏问题(选择所有适用选项)

心脏病发作或心肌梗塞

心绞痛→ 跳至问题 H1b

冠状动脉心脏疾病/冠心病/动脉粥样硬化

心脏衰竭或充血性心脏衰竭→ 跳至问题 H1c

其它心血管疾病, 具体: \_\_\_\_\_ → 跳至问题 H1d

H1b. 您仍有心绞痛吗？

没有

有

不清楚

H1c. 您仍有心脏衰竭或充血性心脏衰竭吗？

没有

有

不清楚

H1d. 您仍有其他心血管疾病吗？

没有

有

---

<sup>31</sup> Assessment approach parallels US BRFSS 2015 with supplemental follow-up questions.

不清楚

H2. 高血压

没有

有 → 跳至问题 H2a

不清楚

H2a. 您仍有高血压吗?

没有

有

不清楚

H3. 中风

没有

有

不清楚

H4. 哮喘、慢性阻塞性肺病、肺气肿、或者慢性支气管炎

没有 → 跳至 H5

有 → 跳至 H4a

不清楚 → 跳至 H5

H4a. 哪种肺部慢性疾病? [选择所有适用选项]

哮喘 → 跳至问题 H4a.i

慢性阻塞性肺病 (COPD) → 跳至问题 H4a.ii

慢性支气管炎 → 跳至问题 H4a.iii

其他慢性肺部疾病, 请注明: \_\_\_\_\_ → 跳至问题 H4a.iv

H4a.i. 您仍有哮喘吗?

没有 → 跳至 H5

有 → 跳至 H4b 和 H4c

不清楚 → 跳至 H4b 和 H4c

H4a.ii. 您仍有慢性阻塞性肺病吗 (COPD)?

没有 → 跳至 H5

有 → 跳至 H4b 和 H4c

不清楚 → 跳至 H4b 和 H4c

H4a.iii. 您仍有慢性支气管炎吗?

没有 → 跳至 H5

有 → 跳至 H4b 和 H4c

不清楚 → 跳至 H4b 和 H4c

H4a.iv. 您仍有 [其他慢性肺部疾病] 吗?

- 没有→跳至 H5
- 有→跳至 H4b 和 H4c
- 不清楚→跳至 H4b 和 H4c

H4b. 慢性肺病的症状包括非感冒或呼吸道感染时的咳嗽、气喘、气促、胸闷、多痰。过去 30 天内，您出现这些症状的频率是？<sup>32</sup> [大声读出选项]

- 每天
- 每周几次
- 每周一次
- 每月几次
- 过去一个月至少一次
- 过去一个月没有出现
- 不清楚

H4c. 您需要定期使用氧气罐帮助呼吸吗（一周至少一次）？

- 不需要
- 定期需要（至少每周一次）
- 不清楚

H5. 肾病（调查员注意：不包括肾结石、膀胱感染或失禁）

- 没有
- 有→跳至问题 H5a
- 不清楚

H5a. 您仍有肾病吗？

- 没有→跳至问题 H6
- 有→跳至问题 H5b
- 不清楚→跳至问题 H5b

H5b. 您需要透析吗？

- 没有
- 有
- 不清楚

H6. 肝病，包括慢性肝炎

- 没有
- 有→跳至问题 H6a
- 不清楚

---

<sup>32</sup> From US BRFSS 2014 Questionnaire; response options were expanded to fit standard format

H6a. 您有哪种肝病？

- 慢性乙肝
- 慢性丙肝
- 肝硬化
- 其他，具体注明: \_\_\_\_\_

H6b. 您当前仍有肝病吗？

- 没有
- 有
- 不清楚

H7. 癌症

- 没有 → 跳至 H8
- 有 → 跳至 H7a
- 不清楚 → 跳至问题 H8

H7a. 您得了哪种癌症？

- 乳腺癌 → 跳至 H7b
- 宫颈癌 → 跳至 H7c
- 大肠癌 → 跳至 H7d
- 肝癌 → 跳至 H7e
- 肺癌 → 跳至 H7f
- 皮肤癌 → 跳至 H7g
- 前列腺癌 → 跳至 H7h
- 其它, 详细说明: \_\_\_\_\_ → 跳至 H7i

[编程注意：调查问卷会根据相关的备选选项自动填充后续跟进问题。]

H7b. 您当前仍有乳腺癌吗？

- 没有
- 有
- 不清楚

H7c. 您当前仍有宫颈癌吗？

- 没有
- 有
- 不清楚

H7d. 您当前仍有大肠癌吗？

- 没有
- 有
- 不清楚

H7e. 您当前仍有肝癌吗？

- 没有
- 有
- 不清楚

H7f. 您当前仍有肺癌吗？

- 没有
- 有
- 不清楚

H7g. 您当前仍有皮肤癌吗？

- 没有
- 有
- 不清楚

H7h. 您当前仍有前列腺癌吗？

- 没有
- 有
- 不清楚

H7i. 您当前仍有[其他]癌吗？

- 没有
- 有
- 不清楚

[编程请注意: 如果研究对象回答有至少 1 项癌症, 请询问 H7j 关于治疗的问题。]

H7j. 您现在接受癌症治疗吗? 我们所指的具体治疗方式包括手术、放疗、化疗或化疗药。

- 有 → 跳至问题 *H7j.i*
- 没有, 我已经完成了治疗
- 没有, 我拒绝了治疗
- 没有, 我还没有开始治疗
- 不清楚

H7j.i. 具体治疗方式 [选择所有适用的选项]:

- 手术
- 放疗
- 化疗
- 化疗药
- 其它, 详细说明: \_\_\_\_\_

H8. 抑郁症或焦虑症

- 没有
- 有 → 跳至 *H8a*
- 不清楚

H8a. 您当前仍有抑郁症或焦虑症吗？

- 没有
- 有
- 不清楚

H9. 糖尿病

- 没有 → 跳至 *H10*
- 有 → 跳至 *H9a*
- 不清楚

H9a. 当你被确诊有糖尿病时的年龄是？ [调查员注意：如果研究对象不能回答准确年龄，请回答近似年龄]

\_\_ \_\_ 岁

H9a.i. 如果是女性并且确诊糖尿病年龄小于 45 岁，请回答：

您是否只在怀孕的时候患有糖尿病？

- 不是
- 是
- 不清楚

H9b. 您当前仍有糖尿病吗？

- 没有 → 跳至 *H10*
- 有 → 跳至 *H9c*
- 不清楚 → 跳至 *H9c*

H9c. 您现在需要胰岛素治疗糖尿病吗？

- 没有
- 有
- 不清楚

H10. 神经系统病症，如癫痫症或帕金森氏病

- 没有
- 有 → 跳至 *H10a*
- 不清楚



H10a. 您当前仍有这种疾病吗？

- 没有
- 有
- 不清楚

H11. 骨关节炎

- 没有
- 有
- 不清楚

H12. 自身免疫疾病，如狼疮或类风湿关节炎

- 没有
- 有 → 跳至 H12a
- 不清楚

H12a. 自身免疫性疾病，请具体说明: \_\_\_\_\_

H13. 除上述疾病外，您目前有任何其他我们没有提到的健康问题？[调查员：大声读出选项][选择所有适用选项]

- 消化系统疾病（如食管，胃或肠）
- 甲状腺功能减退症
- 皮肤问题，如湿疹
- 其他问题或疾病，请注明\_\_\_\_\_
- 不清楚
- 没有

H14. 您在服用医生或者医疗专业人士开具的处方药吗？

- 没有 → 跳至 H15
- 有 → 跳至 H14a
- 不清楚 → 跳至 H14a

H14a. 您每天需要服用医生开的多少种处方药？<sup>33</sup>

[注意：请填写药物的种数而不是粒数]

\_\_\_ 种

H14b. 您目前服用强的松或其他类固醇药物（不包括吸入性和一次性注射的类固醇）或任何其他可以抑制身体抵抗感染能力的药物？

[注意：例如包括治疗肿瘤、狼疮等自身免疫疾病的药物]

- 没有
- 有 → 跳至 H14c
- 不清楚 → 跳至 H14c

---

<sup>33</sup> Contributes to Groningen Frailty Indicator

H14c. 具体药物名称:[调查员注意: 确定具体药物名称]

---

H15. 您最近在非自愿的情况下体重减轻很多吗? <sup>34</sup>

- 没有 → 跳至 H16
- 有 → 跳至 H15a
- 不清楚 → 跳至 H16

H15a. 您过去 12 个月内体重减轻多少公斤? (调查员请注意: 鼓励老年人估计减轻的体重)

\_\_\_\_\_公斤  
 不清楚

H15b. 您过去 6 个月体重减轻多少公斤? (调查员请注意: 鼓励老年人估计减轻的体重)

\_\_\_\_\_公斤  
 不清楚

H15c. 您过去 1 个月 (30 天) 体重减轻多少公斤? (调查员请注意: 鼓励老年人估计减轻的体重)

\_\_\_\_\_公斤  
 不清楚

H16. 过去 12 个月内您摔倒过吗? 比如你站着、坐着、或俯身时突然摔倒。 <sup>35 36</sup>

- 没有 → 跳至问题 H17
- 有 → 跳至问题 H16a
- 不清楚 → 跳至问题 H17

H16a. 您过去 12 个月内摔倒过多少次?

\_\_ \_\_ 次摔倒

H16b. 您过去 12 个月内因摔倒而受伤过吗? 受伤是指需要去看医生或者因摔倒而至少一天日常活动受到限制。

- 没有 → 跳至问题 H17
- 有 → 跳至问题 H16b.i
- 不清楚 → 跳至问题 H17

---

<sup>34</sup> Contributes to Groningen Frailty Indicator and Tilburg Frailty Indicator (Physical Subscale)

<sup>35</sup> From US BRFSS 2014 with minor wording changes.

<sup>36</sup> From US BRFSS 2014 with minor wording changes

H16b.i. 您过去 12 个月内因摔倒导致的受伤而需要去看医生吗？

没有 → 跳至问题 H17

有 → 跳至问题 H16b.ii

H16b.ii. 医生告诉您摔倒受伤有没有导致骨裂或骨折？

没有

有

不清楚

H17. (编程提示：根据性别提问)

男性：您曾经作为病人住院至少一晚吗？[调查员注意：这只包含作为病人在医院呆的时间，而不包括作为看护在医院呆的时间。]

女性：除了分娩，您曾经作为病人住院至少一晚吗？[调查员注意：这只包含作为病人在医院呆的时间，而不包括作为看护在医院呆的时间。]

没有 → 跳至问题 H18

有 → 跳至问题 H17a

拒绝回答 → 跳至问题 H18

H17a. 您住院过多少次？

\_\_\_ 次

H17b. 过去两年内，您住院至少一晚一共有多少次？

0 次 → 跳至问题 H18

1 次

2 次

3 次

4 次

5 次或更多

调查员：在下列空格中记录四次最近的住院

(编程注意：根据 H17b 列出的答案自动填充过去两年住院的行数)

|       | i. 您曾在何年何月住院？                                                                                                                                           | ii. 您当时住院的原因是？<br>[调查员：请不要读出选项。根据被提问者的回答填写，所有适用选项打勾。]                                                                                                   |
|-------|---------------------------------------------------------------------------------------------------------------------------------------------------------|---------------------------------------------------------------------------------------------------------------------------------------------------------|
| H17c. | H17c.i. 住院的年份<br>1:<br><input type="checkbox"/> 2013<br><input type="checkbox"/> 2014<br><input type="checkbox"/> 2015<br><input type="checkbox"/> 2016 | H17c.iii.<br><input type="checkbox"/> 急性呼吸系统疾病<br><input type="checkbox"/> 急性非呼吸系统疾病<br><input type="checkbox"/> 慢性疾病<br><input type="checkbox"/> 损伤或创伤 |

|                                   |                                                                                                                                                                                                                                                                                                                                                |                                                                                                                                                                                                             |
|-----------------------------------|------------------------------------------------------------------------------------------------------------------------------------------------------------------------------------------------------------------------------------------------------------------------------------------------------------------------------------------------|-------------------------------------------------------------------------------------------------------------------------------------------------------------------------------------------------------------|
|                                   | <input type="checkbox"/> 不清楚<br><input type="checkbox"/> 拒绝回答<br><br><b>H17c.ii. 住院的月份</b><br>1: [从下拉菜单中选择]<br><input type="checkbox"/> 不清楚<br><input type="checkbox"/> 拒绝回答                                                                                                                                                                   | <input type="checkbox"/> 其它, 请详细说明: _____                                                                                                                                                                   |
| <b>H17d.</b>                      | <b>H17d.i. 住院的年份</b><br>2:<br><input type="checkbox"/> 2013<br><input type="checkbox"/> 2014<br><input type="checkbox"/> 2015<br><input type="checkbox"/> 2016<br><input type="checkbox"/> 不清楚<br><input type="checkbox"/> 拒绝回答<br><br><b>H17d.ii. 住院的月份</b><br>2: [从下拉菜单中选择]<br><input type="checkbox"/> 不清楚<br><input type="checkbox"/> 拒绝回答 | <b>H17d.iii.</b><br><input type="checkbox"/> 急性呼吸系统疾病<br><input type="checkbox"/> 急性非呼吸系统疾病<br><input type="checkbox"/> 慢性疾病<br><input type="checkbox"/> 损伤或创伤<br><input type="checkbox"/> 其它, 请详细说明: _____ |
| <b>H17e-f. 将会自动显示最多 4 个最近住院记录</b> |                                                                                                                                                                                                                                                                                                                                                |                                                                                                                                                                                                             |

H18. 您认为最近一年, 您的健康状况总体上说是变差了, 和以前差不多还是变好了?

- 变差 → 跳至问题 *H18a*  
 相同  
 变好 → 跳至问题 *H18b*

H18a. 您能说是有点变差还是变差很多吗?

- 变差很多  
 有点变差

H18b. 是有点变好还是变好很多?

- 有点变好  
 变好很多

---

## K. 知识、态度和行为

我们几乎已经完成这个问卷了, 我还有一些问题想要问您。

K1. 您听说过流感病毒吗?

- 没有→解释说：流感是一种微生物或病毒，能导致人生病，有咳嗽、流鼻涕、全身酸痛、发烧症状。在这个地区每年会出现一到两次。
- 听说过

K2. 您对流感病毒或它会导致的疾病了解多少？（大声读出选项）

- 一点不了解→跳至问题 K4
- 了解一点→跳至问题 K3
- 了解一些→跳至问题 K3
- 了解很多→跳至问题 K3
- 了解非常多→跳至问题 K3

## 流感病毒的问题

我要读出一些有关流感的说法。请您告诉我同不同意这些说法以及赞同或者反对的程度。

[出示卡片 K3]

|                                  | 十分<br>赞同 | 有点<br>同意 | 中<br>立 | 不太<br>同意 | 非常<br>反对 |
|----------------------------------|----------|----------|--------|----------|----------|
| K3a. 我不会因为感染流感患上重症 <sup>37</sup> | ○        | ○        | ○      | ○        | ○        |
| K3b. 如果我得了流感，病情可能很严重，延续整整一个星期    | ○        | ○        | ○      | ○        | ○        |
| K3c. 我担心这个季节会得流感                 | ○        | ○        | ○      | ○        | ○        |
| K3d. 我比同龄人更容易得流感                 | ○        | ○        | ○      | ○        | ○        |
| K3e. 如果得了流感，我的症状可能严重到要住院         | ○        | ○        | ○      | ○        | ○        |
| K3f. 流感比“重感冒”更严重                 | ○        | ○        | ○      | ○        | ○        |
| K3g. 如果我得了流感，有可能发展成肺炎            | ○        | ○        | ○      | ○        | ○        |

K4. 您有多担心今年自己会得流感？（出示卡片 K4 并读出选项）

- 极其担心
- 很担心
- 有点担心
- 不太担心
- 根本不担心

<sup>37</sup> Reverse indicates an item to be scored in the reverse direction from other items within the associated scale or construct.

K5. 您听说过流感疫苗吗?

没有 → 解释说: “成年人每年都可以接种这种疫苗, 可以减少得流感的危险”。

有

K6. 您对流感疫苗了解多少? (大声读出选项)

一点不了解 → 跳至问题 K7

了解一点 → 跳至问题 K6a

了解一些 → 跳至问题 K6a

了解很多 → 跳至问题 K6a

了解非常多 → 跳至问题 K6a

K6a. 您曾经接种过流感疫苗吗?

否 → 跳至问题 K6d

是 → 跳至问题 K6b

不清楚 → 跳至问题 K6d

K6b. 过去 5 年, 您接种过多少次流感疫苗?

0 次 → 跳至问题 K7

1 次

2 次

3 次

4 次

5 次

不清楚

K6c. 您记得在哪几年接种过流感疫苗? [选择所有适用选项]

2010

2011

2012

2013

2014

2015

不清楚

K6d. 在接下来的 12 个月, 您有多大的可能性接种流感疫苗? [出示卡片 K6d]

几乎为 0

很少的可能

有点小的可能性

- 大约一半的可能
- 比较大的可能
- 很大的可能
- 几乎 100%

## 流感疫苗的问题

我要读一些有关流感疫苗的说法。请您告诉我同不同意这些说法以及赞同或者反对的程度。

### [出示卡片K7]

|                                  | 十分赞同                  | 有点同意                  | 中立                    | 不太同意                  | 非常反对                  |
|----------------------------------|-----------------------|-----------------------|-----------------------|-----------------------|-----------------------|
| K7a. 我平时没有时间去接种（流感疫苗）            | <input type="radio"/> | <input type="radio"/> | <input type="radio"/> | <input type="radio"/> | <input type="radio"/> |
| K7b. 我担心流感疫苗有副作用                 | <input type="radio"/> | <input type="radio"/> | <input type="radio"/> | <input type="radio"/> | <input type="radio"/> |
| K7c. 我没有兴趣接种流感疫苗                 | <input type="radio"/> | <input type="radio"/> | <input type="radio"/> | <input type="radio"/> | <input type="radio"/> |
| K7d. 我已经计划好今年去哪里接种流感疫苗           | <input type="radio"/> | <input type="radio"/> | <input type="radio"/> | <input type="radio"/> | <input type="radio"/> |
| K7e. 我担心对流感疫苗的了解还不够充分            | <input type="radio"/> | <input type="radio"/> | <input type="radio"/> | <input type="radio"/> | <input type="radio"/> |
| K7f. 流感疫苗不见得总是有用                 | <input type="radio"/> | <input type="radio"/> | <input type="radio"/> | <input type="radio"/> | <input type="radio"/> |
| K7g. 医生建议我每年都接种流感疫苗              | <input type="radio"/> | <input type="radio"/> | <input type="radio"/> | <input type="radio"/> | <input type="radio"/> |
| K7h. 有家人或朋友劝我不接种流感疫苗             | <input type="radio"/> | <input type="radio"/> | <input type="radio"/> | <input type="radio"/> | <input type="radio"/> |
| K7i. 流感疫苗是安全的                    | <input type="radio"/> | <input type="radio"/> | <input type="radio"/> | <input type="radio"/> | <input type="radio"/> |
| K7j. 如果家人和朋友觉得我应该做某事，我会比较重视他们的意见 | <input type="radio"/> | <input type="radio"/> | <input type="radio"/> | <input type="radio"/> | <input type="radio"/> |
| K7k. 如果听说别人去接种了流感疫苗，我想去的意愿会增强    | <input type="radio"/> | <input type="radio"/> | <input type="radio"/> | <input type="radio"/> | <input type="radio"/> |
| K7l. 接种流感疫苗以后可能会让我不舒服的症状         | <input type="radio"/> | <input type="radio"/> | <input type="radio"/> | <input type="radio"/> | <input type="radio"/> |
| K7m. 我觉得我用不着接种流感疫苗               | <input type="radio"/> | <input type="radio"/> | <input type="radio"/> | <input type="radio"/> | <input type="radio"/> |
| K7n. 如果我接种了流感疫苗，我对自己得流感的担心会减轻    | <input type="radio"/> | <input type="radio"/> | <input type="radio"/> | <input type="radio"/> | <input type="radio"/> |
| K7o. 我相信报纸和电视上有关流感的报道            | <input type="radio"/> | <input type="radio"/> | <input type="radio"/> | <input type="radio"/> | <input type="radio"/> |

|       |                                      |                       |                       |                       |                       |                       |
|-------|--------------------------------------|-----------------------|-----------------------|-----------------------|-----------------------|-----------------------|
| K7p.  | 我有自信知道需要做什么来预防自己得流感                  | <input type="radio"/> | <input type="radio"/> | <input type="radio"/> | <input type="radio"/> | <input type="radio"/> |
| K7q.  | 我够健康，不需要接种流感疫苗                       | <input type="radio"/> | <input type="radio"/> | <input type="radio"/> | <input type="radio"/> | <input type="radio"/> |
| K7r.  | 我相信我能自己一个人去接种疫苗                      | <input type="radio"/> | <input type="radio"/> | <input type="radio"/> | <input type="radio"/> | <input type="radio"/> |
| K7s.  | 流感疫苗有很小可能让我得流感                       | <input type="radio"/> | <input type="radio"/> | <input type="radio"/> | <input type="radio"/> | <input type="radio"/> |
| K7t.  | 流感疫苗能够保护我不得流感                        | <input type="radio"/> | <input type="radio"/> | <input type="radio"/> | <input type="radio"/> | <input type="radio"/> |
| K7u.  | 如果没有接种流感疫苗，我觉得这一年我会得流感               | <input type="radio"/> | <input type="radio"/> | <input type="radio"/> | <input type="radio"/> | <input type="radio"/> |
| K7v.  | 流感疫苗的严重副作用是很少见的                      | <input type="radio"/> | <input type="radio"/> | <input type="radio"/> | <input type="radio"/> | <input type="radio"/> |
| K7w.  | 关于今年我是否会接种流感疫苗我没有想太多                 | <input type="radio"/> | <input type="radio"/> | <input type="radio"/> | <input type="radio"/> | <input type="radio"/> |
| K7x.  | 花费时间和金钱去接种流感疫苗是值得的                   | <input type="radio"/> | <input type="radio"/> | <input type="radio"/> | <input type="radio"/> | <input type="radio"/> |
| K7y.  | 我几乎不关注媒体上有关流感疫苗的信息（如电视和报纸）           | <input type="radio"/> | <input type="radio"/> | <input type="radio"/> | <input type="radio"/> | <input type="radio"/> |
| K7z.  | 我认为我已经得到了所有我需要的关于流感疫苗的信息来决定我是否接种流感疫苗 | <input type="radio"/> | <input type="radio"/> | <input type="radio"/> | <input type="radio"/> | <input type="radio"/> |
| K7aa. | 如果我没有接种流感疫苗，而最后得了流感，我会懊恼自己没接种        | <input type="radio"/> | <input type="radio"/> | <input type="radio"/> | <input type="radio"/> | <input type="radio"/> |
| K7bb. | 由于交通的原因，我去接种流感疫苗不方便                  | <input type="radio"/> | <input type="radio"/> | <input type="radio"/> | <input type="radio"/> | <input type="radio"/> |
| K7cc. | 对我来说没有一个方便的流感疫苗接种点                   | <input type="radio"/> | <input type="radio"/> | <input type="radio"/> | <input type="radio"/> | <input type="radio"/> |
| K7dd. | 如果我没有接种流感疫苗，我会很遗憾未能接种                | <input type="radio"/> | <input type="radio"/> | <input type="radio"/> | <input type="radio"/> | <input type="radio"/> |
| K7ee. | 我知道在哪里可以接种流感疫苗                       | <input type="radio"/> | <input type="radio"/> | <input type="radio"/> | <input type="radio"/> | <input type="radio"/> |
| K7ff. | 我能够支付接种流感疫苗的费用                       | <input type="radio"/> | <input type="radio"/> | <input type="radio"/> | <input type="radio"/> | <input type="radio"/> |
| K7gg. | 如果没有接种流感疫苗，我会很容易得流感                  | <input type="radio"/> | <input type="radio"/> | <input type="radio"/> | <input type="radio"/> | <input type="radio"/> |
| K7hh. | 我觉得我必须去接种流感疫苗                        | <input type="radio"/> | <input type="radio"/> | <input type="radio"/> | <input type="radio"/> | <input type="radio"/> |



- K7ii. 如果我接种了流感疫苗，也有可能得流感
- K7jj. 我没有时间去接种流感疫苗
- K7kk. 我相信从政府那里得来的关于流感疫苗的信息

K8. 您认为流感疫苗预防您得流感的效果如何? [出示卡片 K8]

- 非常有效
- 很有效
- 有点效果
- 不怎么有效
- 根本没有效果

K9. 如果您无法或没有接种流感疫苗，您觉得您今年得流感的可能性有多大? [出示卡片 K9]

- 几乎为 0
- 很少的可能
- 有点小的可能性
- 大约一半的可能
- 有点大的可能性
- 很大的可能
- 几乎 100%

## M. 结尾

M1. 研究对象是否已签收礼物?

- 否
- 是

### 答题卡

卡片 C7: 各项活动

卡片 D1: 个人每年收入选项

卡片 E1: 家庭每年收入选项

卡片 E5: 家用器具

卡片 E6: 社会地位主观阶梯图

卡片 G2: 健康程度标尺

卡片 I1- I3: 功能状态选项

卡片 J4-J7: 功能状态选项

卡片 K3-K10: KAP 应答选项

# 附录四： 半年跟进访谈

## 附录四：半年跟进访谈

您好, [研究对象姓名], 我叫\_\_\_\_\_, 是老年人流感项目在[研究地点]的调查员。我这次会抽取您的少量血样, 并且询问几个有关您最近身体情况的问题。我在这里提醒您, 您可以不提供这些问题的答案或选择随时退出本研究。

### A. 初始数据管理

A1. 日期: \_\_\_\_/\_\_\_\_/\_\_\_\_ (年/月/日)

A2. 访谈员姓名: \_\_\_\_\_

A2a. 访谈员编号: \_ \_ \_

A3. 信息收集的方法:

- 电话
- 面对面交流
- 其他, 请注明\_\_\_\_\_

### B. 老年人流感项目半年跟进访谈

您好, [参与者姓名]。我叫 XXX, 是老年人流感项目在[XX]的调查员。我这次会抽取您的少量血样, 并且询问几个有关您最近身体情况的问题。我在这里提醒您, 您可以不提供这些问题的答案或选择随时退出本研究。

B1. 回顾过去的一个月, 您认为自己总体健康状况是? [读出选项]?

- 非常好
- 很好
- 不错
- 一般
- 很差

B2. 过去六个月来 (或者自从 \_\_\_\_\_), 您的健康状况总体上说是变差了, 和以前差不多还是变好了?

变差 → 转至 B2a

B2a. 您能说是有点变差还是变差很多吗?

- 变差很多 → 转至 B3
- 有点变差 → 转至 B3

相同 → 转至 B3

变好 → 转至 B2b

B2b. 您能说是有点变好还是变好很多吗?

有点变好 → 转至B3

变好很多 → 转至 B3

B3. 现在请回想一下您的整体健康水平。在过去一个月（30天）内，您有多少天生病、受伤或者身体不舒服？<sup>38</sup>

\_\_\_ 天 [若大于 0，继续至 B3a]

B3a. 在您生病、受伤或身体不舒服的这些时间里，您有多少天（至少半天）需要卧床休息？

\_\_\_ 天

B4. 过去30天内，有多少天您感到心情不太好，比如悲伤、压抑、忧虑或焦躁？

\_\_\_ 天

B5. 过去30天内，有多少天你感到非常健康并精力十足？

\_\_\_ 天

---

<sup>38</sup> From US BRFSS 2014 Questionnaire

附录五：  
每年健康和功能状  
况评估表

## 附录五：每年健康和功能状态评估表

### A. 管理信息

A1. 日期： \_\_\_\_/\_\_\_\_/\_\_\_\_ (年/月/日)

A2. 访谈员姓名： \_\_\_\_\_

A2a. 访谈员编号： \_\_\_\_

A3. 城市：

苏州

盐城

A4. 再知情同意是否取得对象的签名

是

否

### 开场白

您好，[参与者姓名]。我叫 XXX，是[研究地点][研究项目名]的工作人员，现在想跟进了解您的近期情况。您在 XX 年 XX 月参与了我们的研究，我有一些问题想问您。我们这次的谈话会在 20 分钟内结束，请问现在方便进行吗？

### 如果参与者不确定你为什么打给/拜访他/她：

说：您在 XX 年 XX 月参与了一个研究，研究是关于 XX 地区 60 岁及以上老年人的流感疾病情况，这次访谈主要是问几个问题，了解您最近的一些疾病情况。

### 如果参与者表明现在不方便进行访谈：

说：谢谢。下次是否有适宜的时间重新进行访谈？

[如果回答是]，在研究追踪系统上记录好日期和时间，感谢参与者，提醒参与者他们可以随时退出研究，以及你会在安排好的时间里打回来。

[如果回答不是]，感谢参与者，过几天再打过来。结束电话访谈。

### 如果参与者指出现在方便进行访谈，继续以下访谈内容：

说：谢谢，稍作提醒，您可以在任何时候退出研究或者拒绝回答任何问题。

请继续回答 B1。

## B. 人口特征

B1. 请核对您的电话号码以便我们与您取得联系

\_\_\_\_\_ (输入 11 位数字的电话号码，包括区号)

B2. 您目前的体重是（不包括鞋子）？

\_\_\_ \_\_\_ 公斤（范围23-227）保留一位小数，如：45.5kg

B3. 在过去的 12 个月里，您觉得您的财政支付能力，包括您支付家用、饮食，以及每个月的账单，是降低、提高还是没有变化？

降低 → 请回答 B3a

B3a. 您觉得“降低很多”还是“有点降低”？

降低很多 → 请回答 B3c

有点降低 → 请回答 B3c

没有变化 → 请回答 B3c

提高 → 请回答 B3b

B3b. 您觉得是“有点提高”还是“提高很多”？

有点提高 → 请回答 B3c

提高很多 → 请回答 B3c

B3c. 在过去的12个月里，您所有家庭成员的总收入是增加、减少还是保持不变？

增加

保持不变

减少

B3d. 就支付家庭日常开销，如家用、食物以及其他每个月的账单的困难程度，对于您来说是…

完全没有困难

不是很困难

有一点困难

很困难

极其困难

B4. 请您想象一条有 9 层台阶的梯子。[取出卡片] 在梯子最高第 9 层的是在你们城市中最富有的家庭，拥有最多的钱，接受最好的教育，做着最受人尊重的工作。而在梯子最低第 1 层的是在你们城市中最贫穷的家庭，有最少钱，接受最

差的教育，做着最不受人尊重的工作或者连工作都没有。1 是最低，9 是最高，请您从数字 1-9 中选择一个代表您的家庭在梯子上的位置。<sup>39</sup>

- 1
- 2
- 3
- 4
- 5
- 6
- 7
- 8
- 9
- 不知道
- 拒绝回答

B5. 您是否享有离退休工资或者政府养老金？<sup>40</sup>

- 退休工资（工人/公司雇员）
- 离休工资（政府、事业单位）
- 政府养老金（包括低保、新农保等）
- 没有退休工资或者政府养老金
- 不知道
- 拒绝回答

B6. 您是否继续从事有收入的工作或劳动？

- 是
- 否
- 不知道
- 拒绝回答

B7. 您现在主要的生活来源是什么？（单选）

- 退休工资或政府养老金
- 配偶
- 子女或孙子女
- 其他亲属
- 自己劳动或工作
- 其他，请注明：\_\_\_\_\_
- 不知道 → 跳转至 B8
- 拒绝回答 → 跳转至 B8

B7a. 您每月主要生活来源（根据 B7 的答案自动生成）收入大概是多少元（访谈员注意：如果主要生活来源是配偶，请记录配偶的月工资）

\_\_\_\_\_元

<sup>39</sup> Standardized single-item subjective social status (SSS) measure. *MacArthur Scale of Subjective Social Status*. (1999)

<sup>40</sup> Questions B5-B10 are adapted from Questionnaire for the 2008-9 Wave of Chinese Longitudinal Healthy Longevity Survey (CLHLS). Minor changes are adopted to reflect changes to China's current pension system.



- 不知道
- 拒绝回答

B8. 除上述主要生活来源以外，您现在其他的生活来源是（访谈员注意：多选，最多选3项）

- 退休工资或政府养老金
- 配偶
- 子女或孙子女
- 其他亲属
- 自己劳动或工作
- 其他，请注明：\_\_\_\_\_
- 无其他来源（此项不得与其他选项一同选择）→ 跳转至 B10
- 不知道 → 跳转至 B10
- 拒绝回答 → 跳转至 B10

B9. 您每月其他生活来源的收入大概是多少？

B9a. 第一项：\_\_\_\_\_元

- 不知道 → 跳转至 B10
- 拒绝回答 → 跳转至 B10

B9b. 第二项：\_\_\_\_\_元

- 不知道 → 跳转至 B10
- 拒绝回答 → 跳转至 B10

B9c. 第三项：\_\_\_\_\_元

- 不知道 → 跳转至 B10
- 拒绝回答 → 跳转至 B10

B10. 您全家 2016 年 8 月大概挣了多少钱？

\_\_\_\_\_元

- 不知道
- 拒绝回答

## C. 家庭信息

我想了解一下您的家庭情况以及与您同住的其他人。

C1. 在过去一年里，您的家庭成员数量是否有变化？

- 是 → 请回答 C1a
- 否 → 请回答 C2

C1a. 现在您一共与多少个人同住？请不要把自己算在内。

0 家里没有其他人 → 请回答 C2

1

2

3

4

5

6

7

8

9

10 或更多

C1b. 与您同住的家人年龄分别是？

[注意：问卷调查会根据家庭成员数目自动生成相应数目的选项。]

C1b\_1. \_\_\_ 岁 成员 1

C1b\_2. \_\_\_ 岁 成员 2

C1b\_3. \_\_\_ 岁 成员 3

C1b\_4. \_\_\_ 岁 成员 4

C1b\_5. \_\_\_ 岁 成员 5

C1b\_6. \_\_\_ 岁 成员 6

C1b\_7. \_\_\_ 岁 成员 7

C1b\_8. \_\_\_ 岁 成员 8

C1b\_9. \_\_\_ 岁 成员 9

C1b\_10. \_\_\_ 岁 成员 10

C2. 以下的问题与您现在的日常活动有关。以下的每一项活动，如果您曾在过去 12 个月里面做过，请告诉我们。(取出卡片 C2)<sup>41</sup>

|              |                                  |                                  | [如果曾经做过该项活动] 做该项活动的频率<br>[注意：曾经做过该活动才需要填写频率] |                                  |                                  |                                  |                                  |                                  |
|--------------|----------------------------------|----------------------------------|----------------------------------------------|----------------------------------|----------------------------------|----------------------------------|----------------------------------|----------------------------------|
|              | 有                                | 没有                               | 每天                                           | 一周几次                             | 一周一<br>次                         | 一个月<br>几次                        | 一个<br>月至<br>少一<br>次              | 一个<br>月少<br>于一<br>次              |
| C2a. 照看或照顾小孩 | <input checked="" type="radio"/> | <input checked="" type="radio"/> | <input checked="" type="radio"/>             | <input checked="" type="radio"/> | <input checked="" type="radio"/> | <input checked="" type="radio"/> | <input checked="" type="radio"/> | <input checked="" type="radio"/> |

<sup>41</sup> Unless otherwise noted, all of these activities and the response options are from NIA Health Retirement Study; some wording changes were made to make them culturally appropriate.

|                                                          |                       |                       |                       |                       |                       |                       |                       |                       |
|----------------------------------------------------------|-----------------------|-----------------------|-----------------------|-----------------------|-----------------------|-----------------------|-----------------------|-----------------------|
| C2b. 和朋友或家人打麻将、扑克或玩其他棋牌类游戏，例如中国象棋、国际象棋、围棋等 <sup>42</sup> | <input type="radio"/> | <input type="radio"/> | <input type="radio"/> | <input type="radio"/> | <input type="radio"/> | <input type="radio"/> | <input type="radio"/> | <input type="radio"/> |
| C2c. 体力活动，例如打太极、做园艺，或者步行 20 分钟以上 <sup>43</sup>           | <input type="radio"/> | <input type="radio"/> | <input type="radio"/> | <input type="radio"/> | <input type="radio"/> | <input type="radio"/> | <input type="radio"/> | <input type="radio"/> |
| C2d. 烤面包/蛋糕或做大餐                                          | <input type="radio"/> | <input type="radio"/> | <input type="radio"/> | <input type="radio"/> | <input type="radio"/> | <input type="radio"/> | <input type="radio"/> | <input type="radio"/> |
| C2e. 照顾生病或残疾的家人或朋友                                       | <input type="radio"/> | <input type="radio"/> | <input type="radio"/> | <input type="radio"/> | <input type="radio"/> | <input type="radio"/> | <input type="radio"/> | <input type="radio"/> |
| C2f. 和孙子孙女或其他小孩进行一些活动                                    | <input type="radio"/> | <input type="radio"/> | <input type="radio"/> | <input type="radio"/> | <input type="radio"/> | <input type="radio"/> | <input type="radio"/> | <input type="radio"/> |
| C2g. 去过卖活禽的市场                                            | <input type="radio"/> | <input type="radio"/> | <input type="radio"/> | <input type="radio"/> | <input type="radio"/> | <input type="radio"/> | <input type="radio"/> | <input type="radio"/> |

如果 C2g 回答了是和频率，接着回答 C2g.ii。

C2g.ii 您去年里在活禽市场购买了多少只活禽？<sup>44</sup>

- 去年 0 只
- 去年 1-2 只
- 去年 3-5 只
- 去年 6-11 只
- 每月 1-2 只
- 每周 1-2 只
- 每周 3-5 只
- 基本每天都买
- 不知道
- 拒绝回答

C2g.iii 在决定购买活禽前，您会用手接触活禽自己挑选吗？

- 从不
- 有时
- 经常
- 频繁
- 总是

<sup>42</sup> Similar group social activity items are within US BRFSS 2014 Questionnaire. Responses can also be translated into Frailty Phenotype item.

<sup>43</sup> Adapted from exercise item from US BRFSS 2014 Questionnaire. Responses can be translated into Frailty Phenotype item.

<sup>44</sup> Questions from C2g.ii downwards to the end of the section C are from the survey questionnaire of a study to investigate live poultry exposure and public response to influenza A (H7N9) in urban and rural China during two epidemic waves in 2013-2014. Minor wording changes are adopted to make the measurement scale consistent with the rest of the questionnaire.

- 不知道
- 拒绝回答

- C2g.iv 您购买的活禽在哪里进行宰杀？
- 一直在购买活禽的市场 → 继续回答 C2g. iv-1
  - 通常在购买活禽的市场 → 继续回答 C2g. iv-1
  - 通常在家中宰杀→ 跳转 C3
  - 一直在家中宰杀→ 跳转 C3
  - 其他地方，请注明：\_\_\_\_\_ →跳转 C3
  - 不知道→跳转 C3
  - 拒绝回答→跳转 C3

- C2g.iv-1 在活禽市场宰杀您所购买的活禽时，您习惯近距离（约2米范围内）观看摊主的宰杀过程吗？
- 从不
  - 有时
  - 经常
  - 频繁
  - 总是
  - 不知道
  - 拒绝回答

- C3 在过去一年中，您家饲养家禽吗？
- 是→ 继续回答 C3a
  - 否 → 跳转到 D（总体健康）
  - 不知道→跳转到 D（总体健康）
  - 拒绝回答→跳转到 D（总体健康）

- C3a 您家饲养的家禽是（多选题）？
- 鸡
  - 鸭
  - 鹅
  - 其他，请注明 \_\_\_\_\_
  - 不知道
  - 拒绝回答

- C3b 您家去年一般一共饲养多少只（含鸡/鸭/鹅/其它）？
- \_\_\_\_\_（数字答案）
- 不知道
  - 拒绝回答

## D. 总体健康状况/慢性疾病

D1. 回想过去的一个月里，您的总体身体状况是？ [读出选项]

- 非常好
- 很好
- 不错
- 一般
- 差

D2. 您认为最近一年，您的健康状况总体上与以前相同，变好或变差？

变差 → 请回答 D2a

D2a. 具体说，是有点变差还是变差很多？

- 变差很多
- 有点变差

相同 → 请回答 D3

变好 → 请回答 D2b

D2b. 具体说，是有点变好还是变好很多？

- 有点变好
- 变好很多

D3. 现在评价一下您目前的健康状况。使用这把尺子 [取出卡片 G2]，100 表示您觉得最好的健康状况，0 表示您觉得最差的健康状况。请您在尺子上打“X”表示过去 24 小时您的健康状况。<sup>45</sup>

评分: \_\_\_ \_\_\_ \_\_\_ (输入数字 0 到 100)

D4. 在过去的一年里，您是否曾使用手杖、助行器或者轮椅帮助您行走？

- 是
- 否

D5. 您是否经历过因为视力不良造成的日常生活不便？<sup>46</sup>

- 是 → 请回答 D5a
- 否 → 请回答 D6

D5a. 您是否失明或者有即使戴眼镜都无法改善的严重的视力障碍？<sup>47</sup>

- 是
- 否

---

<sup>45</sup> Visual analogue scale adapted from EQ-5D.

<sup>46</sup> Groningen Frailty Indicator

<sup>47</sup> US BRFSS 2014 Questionnaire

D6. 您是否经历过因为听力不良造成的日常生活不便?<sup>48</sup>

是 → 请回答 D6a

否 → 请回答 D7

D6a. 您是否佩戴助听器?

是

否

D7. 您每周会离开家外出几天?

0 天

1 天

2 天

3 天

4 天

5 天

6 天

7 天

D8. 在过去的一年里, 是否有医疗保健提供者说您患上了新的疾病?

是 → 请回答 D8a

否 → 请回答 D9

D8a. 在过去的一年里, 您是否曾被诊断出以下疾病或是病情加重的情况:

自身免疫性疾病, 如狼疮或类风湿性关节炎

哮喘、慢性阻塞性肺病、肺气肿、慢性支气管炎或其他慢性肺病

癌症

抑郁症或焦虑症

糖尿病

消化系统疾病 (如食管, 胃或肠)

高血压

心脏方面的疾病, 包括心脏病发作、充血性心脏衰竭或心绞痛

甲状腺功能减退症

免疫抑制或免疫系统出现问题

肾病

肝病, 包括慢性肝炎

神经系统病症, 如癫痫症或帕金森氏病

骨关节炎

皮肤问题, 如湿疹

中风

---

<sup>48</sup> Groningen Frailty Indicator

其他疾病，需要临床护理

请注明： \_\_\_\_\_

D9. 您是否每天服用医生或者医疗专业人士开具的处方药吗？

是 → 请回答D9a

否 → 请回答D10

D9a. 您每天需要服用医生开的多少种处方药？

1

2

3

4

5 或更多

D10. 在过去的一年里，您是否曾经住院或在医院过夜？

是 → 请回答D10a

否 → 请回答D11

拒绝回答

D10a. 在过去的一年里，您住过多少次院？

1 次

2次

3次

4次

5次或更多

(编程注意：根据D10a列出的答案自动填充过去两年住院的行数)

|       | i. 您曾在何年何月住院？              | ii. 您当时住院的原因是？<br>[调查员：请不要读出选项。根据被提问者的回答填写，所有适用选项打勾。]                                                                                                                                             |
|-------|----------------------------|---------------------------------------------------------------------------------------------------------------------------------------------------------------------------------------------------|
| D10b. | -- 月[D10b1]<br>-- 年[D10b2] | [D10b3]<br><input type="checkbox"/> 急性呼吸系统疾病<br><input type="checkbox"/> 急性非呼吸系统疾病<br><input type="checkbox"/> 慢性疾病<br><input type="checkbox"/> 损伤或创伤<br><input type="checkbox"/> 其它，请详细说明： _____ |
| D10c. | -- 月[D10c1]<br>-- 年[D10c2] | [D10c3]<br><input type="checkbox"/> 急性呼吸系统疾病<br><input type="checkbox"/> 急性非呼吸系统疾病                                                                                                                |

|                                     |  |                                                                                                                |
|-------------------------------------|--|----------------------------------------------------------------------------------------------------------------|
|                                     |  | <input type="checkbox"/> 慢性疾病<br><input type="checkbox"/> 损伤或创伤<br><input type="checkbox"/> 其它，请详细说明：<br>_____ |
| <b>D10d – e. 将会自动显示最多 4 个最近住院记录</b> |  |                                                                                                                |

D11. 您最近在非自愿的情况下体重减轻很多吗？<sup>49</sup>

- 是 → 请回答 D11a  
 否 → 请回答 D12

D11a. 您过去 12 个月内体重减轻多少公斤？（调查员请注意：鼓励老年人估计减轻的体重）

\_\_\_ 公斤

不确定/不知道

D11b. 您过去 6 个月体重减轻多少公斤？（调查员请注意：鼓励老年人估计减轻的体重）

\_\_\_ 公斤

不确定/不知道

D11c. 您过去 1 个月(30 天)体重减轻多少公斤？（调查员请注意：鼓励老年人估计减轻的体重）

\_\_\_ 公斤

不确定/不知道

D12. 过去 12 个月内您摔倒过吗？比如站着、坐着、或俯身时突然摔倒<sup>50 51</sup>

- 有 → 请回答 D12a  
 没有 → 请回答 D13

D12a. 您过去12个月内摔倒过多少次？

\_\_\_ 次

D12b. 您过去 12 个月内因摔倒而受伤过吗？受伤是指需要去看医生或者因摔倒而至少一天日常活动受到限制。

- 有 → 请回答 D12b.i  
 没有 → 请回答 D13

<sup>49</sup> Contributes to the Frailty Index, the Groningen Frailty Indicator (GFI) and Tilburg Frailty Indicator (Physical Subscale); each uses a different window of time for calculating significant weight loss.

<sup>50</sup> From US BRFSS 2014 with minor wording changes.

<sup>51</sup> From US BRFSS 2014 with minor wording changes



D12b.i. 您过去 12 个月内因摔倒受伤而需要去看医生吗？

有 → 请回答 D12b.ii

没有 → 请回答 D13

D12b.ii. 医生告诉您摔倒受伤有没有导致骨裂或骨折？

有

没有

不确定/不知道

D13. 接下来，我要问您关于肺炎疫苗的问题。人在 50 或 60 岁后通常会注射一到两次肺炎疫苗。它与流感疫苗不同。在过去的一年里，您注射过肺炎疫苗吗？

有

没有

不确定/不知道

## E. 功能状态更新

E1. 现在请想一下您的整体健康水平。过去一个月（30 天）内，有多少天您生病、受伤或者健康状况不佳？<sup>52</sup>

\_\_\_ 天 [如果 >0, 请继续回答 E1a]

E1a. 在您生病、受伤或是健康状况不佳的这些时间里，您有多少天（至少有半天时间）是需要卧床休息的？

\_\_\_ 天

E2. 过去 30 天内，有多少天您感到悲伤、沮丧或焦虑？<sup>53</sup>

\_\_\_ 天

E3. 过去 30 天内，有多少天您感到非常健康并精力十足？<sup>54</sup>

\_\_\_ 天

说明：接下来，我想再问几个关于自理和家务这些活动的问题。请您回想过去一个月来的状况就可以了。对每一个问题，请告诉我您是独立完成还是需要帮助。帮助可以来自家人、朋友、护工或者护士。如果您可以独立完成，请回答完成时是不费力、有困难还是很吃力。如果需要帮助才能完成，请告诉我您是有时、经常、频繁或者一直需要。[取出答题卡 E4, E5, E6, E7]<sup>55</sup>

<sup>52</sup> From US BRFSS 2014 Questionnaire

<sup>53</sup> From US BRFSS 2014 Questionnaire, but combines two mental health items.

<sup>54</sup> From US BRFSS 2014 Questionnaire

<sup>55</sup> This extended version incorporates scaling of difficulty for activities that can be done independently but still may be a challenge for the older person. This reflects scaling by Groningen Activity Restriction Scale (GARS) and includes all the items in this scale plus overlapping items with other prioritized indices.

| 出示卡片E4                        | 可以独立完成    |            |            | 需要帮助   |        |        |        |
|-------------------------------|-----------|------------|------------|--------|--------|--------|--------|
|                               | 没有困难能独立完成 | 能独立完成，但有困难 | 能独立完成，但很吃力 | 有时需要帮助 | 经常需要帮助 | 频繁需要帮助 | 一直需要帮助 |
| E4a 在自己家的几个房间里走动              | ○         | ○          | ○          | ○      | ○      | ○      | ○      |
| E4b 从坐着到起立                    | ○         | ○          | ○          | ○      | ○      | ○      | ○      |
| E4c 上下厕所                      | ○         | ○          | ○          | ○      | ○      | ○      | ○      |
| E4d 上下床                       | ○         | ○          | ○          | ○      | ○      | ○      | ○      |
| E4e 在户外或家附近走动                 | ○         | ○          | ○          | ○      | ○      | ○      | ○      |
| E4f 购买杂货                      | ○         | ○          | ○          | ○      | ○      | ○      | ○      |
| E4g 爬楼梯                       | ○         | ○          | ○          | ○      | ○      | ○      | ○      |
| E4h 自己淋浴或盆浴                   | ○         | ○          | ○          | ○      | ○      | ○      | ○      |
| <b>出示卡片 E5</b>                |           |            |            |        |        |        |        |
| E5a 穿脱衣服                      | ○         | ○          | ○          | ○      | ○      | ○      | ○      |
| E5b 准备我的早餐或午餐                 | ○         | ○          | ○          | ○      | ○      | ○      | ○      |
| E5c 自己吃饭                      | ○         | ○          | ○          | ○      | ○      | ○      | ○      |
| E5d 洗脸洗手                      | ○         | ○          | ○          | ○      | ○      | ○      | ○      |
| E5e 自己洗全身澡                    | ○         | ○          | ○          | ○      | ○      | ○      | ○      |
| E5f 护理脚和脚趾甲                   | ○         | ○          | ○          | ○      | ○      | ○      | ○      |
| E5g 上厕所过程无大小便失禁等意外情况（自如控制大小便） | ○         | ○          | ○          | ○      | ○      | ○      | ○      |

如果E5g回答需要帮助，请询问

E5g.i. 您是否偶尔有大便或小便失控的情况？

- 仅大便  
 仅小便  
 两者均有

| <b>出示卡片 E6</b> |   |   |   |   |   |   |   |
|----------------|---|---|---|---|---|---|---|
| E6a 洗熨衣服       | ○ | ○ | ○ | ○ | ○ | ○ | ○ |
| E6b 铺床或换床单     | ○ | ○ | ○ | ○ | ○ | ○ | ○ |

|     |                 |                       |                       |                       |                       |                       |                       |                       |
|-----|-----------------|-----------------------|-----------------------|-----------------------|-----------------------|-----------------------|-----------------------|-----------------------|
| E6c | 做“轻松”家务如掸灰除尘和整理 | <input type="radio"/> | <input type="radio"/> | <input type="radio"/> | <input type="radio"/> | <input type="radio"/> | <input type="radio"/> | <input type="radio"/> |
| E6d | 做“繁重”家务如拖地和吸尘   | <input type="radio"/> | <input type="radio"/> | <input type="radio"/> | <input type="radio"/> | <input type="radio"/> | <input type="radio"/> | <input type="radio"/> |
| E6e | 按时吃药            | <input type="radio"/> | <input type="radio"/> | <input type="radio"/> | <input type="radio"/> | <input type="radio"/> | <input type="radio"/> | <input type="radio"/> |
| E6f | 缴付账单和自己管钱       | <input type="radio"/> | <input type="radio"/> | <input type="radio"/> | <input type="radio"/> | <input type="radio"/> | <input type="radio"/> | <input type="radio"/> |
| E6g | 准备晚饭            | <input type="radio"/> | <input type="radio"/> | <input type="radio"/> | <input type="radio"/> | <input type="radio"/> | <input type="radio"/> | <input type="radio"/> |

E(4-6)(a-h)\_i. (如果需要帮助完成) 谁为您提供帮助完成这项活动?  
 \_\_\_\_\_ (2017 年度问卷)

说明：现在，请回想一下过去两周内的感受和行为。以下每个问题，请您回答在过去两个礼拜内有几天有这样的感受或者行为。<sup>56</sup>

|                | 根本没有或者少于 1 天                   | 1-2 天                 | 3-4 天                 | 5-7 天                 | 几乎每天                  |
|----------------|--------------------------------|-----------------------|-----------------------|-----------------------|-----------------------|
| <b>出示卡片 E7</b> |                                |                       |                       |                       |                       |
| E7a            | 我为一些小事烦心 <sup>∞</sup>          | <input type="radio"/> | <input type="radio"/> | <input type="radio"/> | <input type="radio"/> |
| E7b            | 我不想吃东西，胃口不好 <sup>∞</sup>       | <input type="radio"/> | <input type="radio"/> | <input type="radio"/> | <input type="radio"/> |
| E7c            | 我弯腰、下蹲或屈膝有困难                   | <input type="radio"/> | <input type="radio"/> | <input type="radio"/> | <input type="radio"/> |
| E7d            | 我保持身体平衡有困难                     | <input type="radio"/> | <input type="radio"/> | <input type="radio"/> | <input type="radio"/> |
| E7e            | 我集中精力有困难 <sup>∞</sup>          | <input type="radio"/> | <input type="radio"/> | <input type="radio"/> | <input type="radio"/> |
| E7f            | 我睡不安稳 <sup>∞</sup>             | <input type="radio"/> | <input type="radio"/> | <input type="radio"/> | <input type="radio"/> |
| E7g            | 我比平时话少 <sup>∞</sup>            | <input type="radio"/> | <input type="radio"/> | <input type="radio"/> | <input type="radio"/> |
| E7h            | 我觉得很开心                         | <input type="radio"/> | <input type="radio"/> | <input type="radio"/> | <input type="radio"/> |
| E7i            | 我觉得做每件事都费力 <sup>∞</sup>        | <input type="radio"/> | <input type="radio"/> | <input type="radio"/> | <input type="radio"/> |
| E7j            | 我记不住事/我老忘事                     | <input type="radio"/> | <input type="radio"/> | <input type="radio"/> | <input type="radio"/> |
| E7k            | 我感觉日子过得没意思/生活空虚* <sup>57</sup> | <input type="radio"/> | <input type="radio"/> | <input type="radio"/> | <input type="radio"/> |
| E7l            | 我想念身边人有人陪伴*                    | <input type="radio"/> | <input type="radio"/> | <input type="radio"/> | <input type="radio"/> |
| E7m            | 我感到孤单、没有人理我*                   | <input type="radio"/> | <input type="radio"/> | <input type="radio"/> | <input type="radio"/> |
| E7n            | 我感到情绪低落或悲伤*                    | <input type="radio"/> | <input type="radio"/> | <input type="radio"/> | <input type="radio"/> |
| E7o            | 我感到紧张或焦虑*                      | <input type="radio"/> | <input type="radio"/> | <input type="radio"/> | <input type="radio"/> |

<sup>56</sup> Items marked with <sup>∞</sup> are from Center for Epidemiologic Studies Depression Scale (CES-D); these are from Radloff's original somatic symptoms scale; Chinese translation is available.

<sup>57</sup> Items marked with \* are psychological items are from the GFI: Groningen Frailty Indicator. Bielderman et al.: Multidimensional structure of the Groningen Frailty Indicator in community-dwelling older people. BMC Geriatrics 2013 13:86.

|     |                             |                       |                       |                       |                       |                       |
|-----|-----------------------------|-----------------------|-----------------------|-----------------------|-----------------------|-----------------------|
| E7p | 我能举起或拿起至少 5 公斤重的东西          | <input type="radio"/> | <input type="radio"/> | <input type="radio"/> | <input type="radio"/> | <input type="radio"/> |
| E7q | 我能抬起胳膊到肩膀以上                 | <input type="radio"/> | <input type="radio"/> | <input type="radio"/> | <input type="radio"/> | <input type="radio"/> |
| E7r | 我不想起床，提不起劲来过日子 <sup>∞</sup> | <input type="radio"/> | <input type="radio"/> | <input type="radio"/> | <input type="radio"/> | <input type="radio"/> |
| E7s | 我没有精力做想做的事                  | <input type="radio"/> | <input type="radio"/> | <input type="radio"/> | <input type="radio"/> | <input type="radio"/> |

## F. 标准化简易精神状态检查 (SMMSE)<sup>58</sup> (2017年度问卷)

接下来我会问您一些问题，有些比较简单，有些可能会有些难度，请您配合回答，感谢您耐心配合。

|    | 问题                                                                                                  | 允许答题时间 | 分数 |
|----|-----------------------------------------------------------------------------------------------------|--------|----|
| F1 | a. 今年是哪一年?                                                                                          | 10 秒   | /1 |
|    | b. 现在是什么季节?                                                                                         | 10 秒   | /1 |
|    | c. 现在是几月?                                                                                           | 10 秒   | /1 |
|    | d. 今天几号?                                                                                            | 10 秒   | /1 |
|    | e. 今天星期几?                                                                                           | 10 秒   | /1 |
| F2 | a. 我们在哪个国家?                                                                                         | 10 秒   | /1 |
|    | b. 我们在哪个省?                                                                                          | 10 秒   | /1 |
|    | c. 我们在哪个城市/镇?                                                                                       | 10 秒   | /1 |
|    | d. (系统提示: 请根据问卷地点提问)<br>[如果在受访者家/老年人活动中心] - 这个活动中心/住家的街道地址是?<br>[如果在社区卫生服务中心/医疗机构/研究办公室] - 这栋楼的名字是? | 10 秒   | /1 |
|    | e. (系统提示: 请根据问卷地点提问)<br>[如果在受访者家/老年人活动中心] - 我们在哪间房?<br>如果在社区卫生服务中心/医疗机构/研究办公室 - 我们在几楼?              | 10 秒   | /1 |
| F3 | [提问者说]: 我会说出三样东西。我说完之后, 请您重复。几分钟后, 我会再次提问, 请您记好这三样东西。<br><br>请缓慢说出下面三个词 (每个词隔 1 秒):<br>球、车、人, 请重复   | 20 秒   | /3 |

<sup>58</sup> Molloy DW, Alemayehu E, Roberts R. Reliability of a standardized Mini-Mental State Examination compared with the traditional Mini-Mental state Examination. American Journal of Psychiatry, Vol. 14, 1991a, pp.102-105

|     |                                                                                                                                          |      |            |
|-----|------------------------------------------------------------------------------------------------------------------------------------------|------|------------|
| F4  | 请跟我重复4, 2, 7, 3, 1。现在, 请调转从后往前读出这些数字。                                                                                                    | 30 秒 | /5         |
| F5  | 我之前让您记住的三个词是什么?                                                                                                                          | 10 秒 | /3         |
| F6  | <b>出示</b> 手表, 问: 这是什么?                                                                                                                   | 10 秒 | /1         |
| F7  | <b>出示</b> 纽扣, 问: 这是什么?                                                                                                                   | 10 秒 | /1         |
| F8  | <b>说:</b> 请跟我重复以下短语: 四十四只石狮子。                                                                                                            | 10 秒 | /1         |
| F9  | 请读出这张纸上的字并且照做。<br>[调查员: 出示一张纸, 上面写着“举起双手”。如果受访者读出来后并没有举起双手, 请重复最多三遍。只有举起双手才给分。]                                                          | 10 秒 | /1         |
| F9a | 如果对象没有举起双手<br>[调查员确认: 对象是否能够看懂纸上的字?]<br><input type="checkbox"/> 否<br><input type="checkbox"/> 是                                         |      |            |
| F10 | <b>说:</b> 说出任意一个完整的句子。                                                                                                                   | 30 秒 | /1         |
| F11 | <b>调查员:</b> 递给受访者需复制的图表、橡皮和铅笔, 说: 请复制这张图。<br>[允许多次尝试。等待受访者完成并交还。只有完全正确地复制了两个五边形及其中间的四边形才能够得分。]                                           | 1 分钟 | /1         |
| F12 | 调查员问受访者惯用左手还是右手。<br>拿一张纸举在受访者跟前, <b>说:</b> 用左/右手接过这张纸(非惯用手),<br>用两只手将这张纸对折, 然后放在地上。每做一个指示给1分<br><br>纸正确拿在手中 /1<br>把纸张对折 /1<br>将纸张放在地上 /1 | 30 秒 |            |
| F13 | <b>总分</b>                                                                                                                                |      | <b>/30</b> |

## G. 疫苗

接下来, 我想问您关于流感疫苗的问题。

G1. 您对流感病毒或它会导致的疾病了解多少?

- 一点不了解  
 了解一点  
 了解一些  
 了解很多

了解非常多

G2. 在过去的 12 个月里，您曾经多大程度担心过自己得流感？[取出答题卡和读出答案]

- 极其担心  
 很担心  
 有点担心  
 不太担心  
 根本不担心

G3. 成年人每年都需接种流感疫苗，可以减少得流感的危险。在过去的 12 个月里，您曾经接种过流感疫苗吗？

- 是 → 请回答 G3a  
 否 → 请回答 G4  
 不清楚  
 拒绝回答

G3a\_1. 您在什么月份接种流感疫苗  
月: \_\_\_\_\_ (一月到十二月)

- 不清楚  
 拒绝回答

G3a\_2. 您在什么年份接种流感疫苗?  
年: \_\_\_\_\_

- 2015  
 2016  
 2017  
 不清楚  
 拒绝回答

G4. 在接下来的 12 个月，您有多大的可能性接种流感疫苗？[取出卡片]

- 几乎为 0  
 很少的可能  
 有点小的可能  
 大约一半的可能  
 比较大的可能  
 很大的可能  
 几乎 100%

## H. 结尾

H1. 请验证以下信息：

地址：[自动填充]

备用电话 #1：[自动填充]

- 已确认  
 地址改变→ 请回答 H1a

H2. 其他联系信息:

其他联系 1:

H2a. 电话号码: \_\_\_\_\_ (输入 11 位包括区号在内的电话号码)

H2b. 电子邮箱地址: \_\_\_\_\_

H2c. 关系: \_\_\_\_\_

其他联系 2:

H3a. 电话号码: \_\_\_\_\_ (输入 11 位包括区号在内的电话号码)

H3b. 电子邮箱地址: \_\_\_\_\_

H3c. 关系: \_\_\_\_\_

相关答题卡

# 附录六： 病历信息表



## 附录六：病历信息表

### A. 管理信息

A1. 信息采集日期：\_\_\_\_/\_\_\_\_/\_\_\_\_ (年/月/日)

A2. 开始采集时间：\_\_\_\_:\_\_\_\_

A3. 获取信息场所：\_\_\_\_\_

### B. 病人基本信息

B1. 病人的出生日期：\_\_\_\_/\_\_\_\_/\_\_\_\_ (年/月/日)

B2. 病人是否有[盐城/苏州]的户口？ \_\_\_\_\_

是  否

B2a. 如果是, 请注明： \_\_\_\_\_

B3. 性别：

男  女

B4. 病人现在居住的地址/地方： \_\_\_\_\_

### C. 既往病史

病人是否有以下慢性病史？

C1. 心脏病发作/心肌梗塞  是  否  无该信息

C2. 心绞痛  是  否  无该信息

C3. 冠心病/冠状动脉疾病/动脉粥样硬化  是  否  无该信息

C4. 心力衰竭/充血性心力衰竭  是  否  无该信息

C5. 其他心脏或心血管疾病，请注明  是  否  无该信息

a. 请注明其他心脏或心血管疾病： \_\_\_\_\_

C6. 高血压  是  否  无该信息

C7. 中风  是  否  无该信息

C8. 哮喘  是  否  无该信息

- C8a. [如果是] 该病人现在还有哮喘?  是  否
- C9. 慢性阻塞性肺病 (COPD)  是  否  无该信息
- C10. 肺气肿  是  否  无该信息
- C11. 慢性支气管炎  是  否  无该信息
- C12. 其他慢性肺病, 请注明  是  否  无该信息
- a. 注明其他慢性肺病: \_\_\_\_\_
- C13. 在家中使⽤氧气罐 (氧疗) 帮助呼吸  是  否  无该信息
- C14. 肾病 [注意: 不包括肾结石, 膀胱炎或小便失禁]  是  否  无该信息
- a. [D14选择是] 是否需要透析?  是  否
- b. [D14选择是] 现在是否还有肾脏疾病?  是  否
- C15. 慢性乙型肝炎  是  否  无该信息
- C16. 慢性丙型肝炎  是  否  无该信息
- C17. 肝硬化  是  否  无该信息
- C18. 其他肝脏疾病, 请注明  是  否  无该信息
- a. 请注明其他肝脏疾病: \_\_\_\_\_
- C19. 乳腺癌  是  否  无该信息
- C20. 宫颈癌  是  否  无该信息
- C21. 结直肠癌  是  否  无该信息
- C22. 肝癌  是  否  无该信息
- C23. 肺癌  是  否  无该信息
- C24. 皮肤癌  是  否  无该信息
- C25. 前列腺癌  是  否  无该信息
- C26. 其他癌症, 请注明  是  否  无该信息
- a. 请注明其他癌症: \_\_\_\_\_

**程序设计说明:** 如果 C19-26 选择**是**, 那么下面的 D26a-e 将会为每个癌症类型进行自动填充。

- a. 病人被诊断的年份: \_\_\_\_ (年)
- b. 病人最近一次接受治疗的年份: \_\_\_\_ (年) (包括各种治疗)
- c. [如果C26b. 病人最近一次接受治疗的年份填充] 病人最近一次接受治疗的月份: (下拉菜单)
  - 一月
  - 二月
  - 三月
  - 四月
  - 五月
  - 六月
  - 不清楚
  - 七月
  - 八月
  - 九月
  - 十月
  - 十一月
  - 十二月
  - 拒绝回答
- d. 病人目前是否接受放射治疗?  是  否  无该信息
- e. 病人目前是否接受化疗?  是  否  无该信息

C27. 抑郁或焦虑症  是  否  无该信息

C28. 糖尿病  是  否  无该信息

a. 发病年龄: \_\_\_\_\_

b. 病人是否使用胰岛素?  是  否  无该信息

c. [如果是女性且发病年龄<45岁, 问:] 病人是否只是在怀孕期间有糖尿病(妊娠糖尿病)?  是  否  无该信息

C29. 神经系统疾病  是  否  无该信息

a. 癫痫  是  否  无该信息

b. 任何癫痫发作  是  否  无该信息

c. 帕金森病  是  否  无该信息

C30. 骨性关节炎  是  否  无该信息

C31. 系统性红斑狼疮  是  否  无该信息

C32. 风湿性关节炎  是  否  无该信息

C33. 其他自身免疫性疾病, 请注明  是  否  无该信息

a. 请注明其他自身免疫性疾病: \_\_\_\_\_

C34. 消化系统疾病 (如食管、胃、肠)  是  否  无该信息

C35. 甲状腺功能减退  是  否  无该信息

C36. 皮肤疾病如湿疹  是  否  无该信息

C37. 其他疾病, 请注明  是  否  无该信息

a. 请注明其他疾病: \_\_\_\_\_

C38. 在纳入研究之前的十二个月中是否住过院  是  否  无该信息

a. [C38选择是] 呼吸系统相关病症?  是  否  无该信息

## D. 结束采集

D1. 停止采集时间: \_\_:\_\_

附录七：  
住院病例报告表

## 附录七：住院病例报告表

### A. 管理信息

A1. 信息采集日期：\_\_\_\_/\_\_\_\_/\_\_\_\_ (年/月/日)

A2. 开始采集时间：\_\_\_\_:\_\_\_\_

### B. 病人基本信息

B1. 病人的出生日期：\_\_\_\_/\_\_\_\_/\_\_\_\_ (年/月/日)

B2. 病人是否有[盐城/苏州]的户口？

是  否

B2a. 如果是，请注明：\_\_\_\_\_

B3. 性别：

男  女

B4. 病人现在居住的地址/地方：\_\_\_\_\_

### C. 现病史

C1. 入院主诉：\_\_\_\_\_

C2. 本次起病的开始日期？\_\_\_\_/\_\_\_\_/\_\_\_\_ (年/月/日)

C3. 本次起病后第一次就诊的日期：\_\_\_\_/\_\_\_\_/\_\_\_\_ (年/月/日)

C4. 生病期间，病人是否体现以下症状？

|                    | 是                        | 否                        | 无该信息                     |
|--------------------|--------------------------|--------------------------|--------------------------|
| a. 发烧或感到发热         | <input type="checkbox"/> | <input type="checkbox"/> | <input type="checkbox"/> |
| b. 寒颤              | <input type="checkbox"/> | <input type="checkbox"/> | <input type="checkbox"/> |
| c. 打喷嚏             | <input type="checkbox"/> | <input type="checkbox"/> | <input type="checkbox"/> |
| d. 流鼻涕或鼻塞          | <input type="checkbox"/> | <input type="checkbox"/> | <input type="checkbox"/> |
| e. 呼吸急促加重或呼吸<br>困难 | <input type="checkbox"/> | <input type="checkbox"/> | <input type="checkbox"/> |
| f. 呼吸疼痛            | <input type="checkbox"/> | <input type="checkbox"/> | <input type="checkbox"/> |

|    |         |                          |                          |                          |
|----|---------|--------------------------|--------------------------|--------------------------|
| g. | 气喘      | <input type="checkbox"/> | <input type="checkbox"/> | <input type="checkbox"/> |
| h. | 咳痰      | <input type="checkbox"/> | <input type="checkbox"/> | <input type="checkbox"/> |
| i. | 喉咙痛     | <input type="checkbox"/> | <input type="checkbox"/> | <input type="checkbox"/> |
| j. | 咳嗽      | <input type="checkbox"/> | <input type="checkbox"/> | <input type="checkbox"/> |
| k. | 身体疼痛    | <input type="checkbox"/> | <input type="checkbox"/> | <input type="checkbox"/> |
| l. | 疲惫      | <input type="checkbox"/> | <input type="checkbox"/> | <input type="checkbox"/> |
| m. | 头痛      | <input type="checkbox"/> | <input type="checkbox"/> | <input type="checkbox"/> |
| n. | 注意力难以集中 | <input type="checkbox"/> | <input type="checkbox"/> | <input type="checkbox"/> |
| o. | 谵妄      | <input type="checkbox"/> | <input type="checkbox"/> | <input type="checkbox"/> |
| p. | 耳痛      | <input type="checkbox"/> | <input type="checkbox"/> | <input type="checkbox"/> |
| q. | 恶心      | <input type="checkbox"/> | <input type="checkbox"/> | <input type="checkbox"/> |
| r. | 呕吐      | <input type="checkbox"/> | <input type="checkbox"/> | <input type="checkbox"/> |
| s. | 腹泻      | <input type="checkbox"/> | <input type="checkbox"/> | <input type="checkbox"/> |
| t. | 食欲不振    | <input type="checkbox"/> | <input type="checkbox"/> | <input type="checkbox"/> |

## D. 既往病史

病人是否有以下慢性病史？

- D1. 心脏病发作/心肌梗塞  是  否  无该信息
- D2. 心绞痛  是  否  无该信息
- D3. 冠心病/冠状动脉疾病/动脉粥样硬化  是  否  无该信息
- D4. 心力衰竭/充血性心力衰竭  是  否  无该信息
- D5. 其他心脏或心血管疾病，请注明  是  否  无该信息
- D14a. 请注明其他心脏或心血管疾病：\_\_\_\_\_
- D6. 高血压  是  否  无该信息
- D7. 中风  是  否  无该信息

- D8. 哮喘  是  否  无该信息
- D8a. [D8选择是] 该病人现在还有哮喘?  是  否
- D9. 慢性阻塞性肺病 (COPD)  是  否  无该信息
- D10. 肺气肿  是  否  无该信息
- D11. 慢性支气管炎  是  否  无该信息
- D12. 其他慢性肺病, 请注明  是  否  无该信息
- D12a. 注明其他慢性肺病: \_\_\_\_\_
- D13. 在家中使⤵用氧气罐(氧疗)帮助呼吸  是  否  无该信息
- D14. 肾病 [注意: 不包括肾结石, 膀胱感染或失禁]  是  否  无该信息
- D14a. [D14选择是] 是否需要透析?  是  否
- D14b. [D14选择是] 现在是否还有肾脏疾病?  是  否
- D15. 慢性乙型肝炎  是  否  无该信息
- D16. 慢性丙型肝炎  是  否  无该信息
- D17. 肝硬化  是  否  无该信息
- D18. 其他肝脏疾病, 请注明  是  否  无该信息
- D18a. 请注明其他肝脏疾病: \_\_\_\_\_
- D19. 乳腺癌  是  否  无该信息
- D20. 宫颈癌  是  否  无该信息
- D21. 结直肠癌  是  否  无该信息
- D22. 肝癌  是  否  无该信息
- D23. 肺癌  是  否  无该信息
- D24. 皮肤癌  是  否  无该信息
- D25. 前列腺癌  是  否  无该信息
- D26. 其他癌症, 请注明  是  否  无该信息



D26\_spec. 请注明其他癌症: \_\_\_\_\_

**程序设计说明:** 如果 D19-26 选择**是**, 那么下面的 D (19-26) (a-e) 将会为每个癌症类型进行自动填充。

- a. 病人被诊断的年份: \_\_\_\_\_ (年)  无该信息
- b. 病人最近一次接受治疗的年份: \_\_\_\_\_ (年)  无该信息
- c. [如果D (19-26) b.病人最近一次接受治疗的年份填充] 病人最近一次接受治疗的月份: (下拉菜单)
- |                           |                            |
|---------------------------|----------------------------|
| <input type="radio"/> 一月  | <input type="radio"/> 七月   |
| <input type="radio"/> 二月  | <input type="radio"/> 八月   |
| <input type="radio"/> 三月  | <input type="radio"/> 九月   |
| <input type="radio"/> 四月  | <input type="radio"/> 十月   |
| <input type="radio"/> 五月  | <input type="radio"/> 十一月  |
| <input type="radio"/> 六月  | <input type="radio"/> 十二月  |
| <input type="radio"/> 不清楚 | <input type="radio"/> 拒绝回答 |
- d. 病人目前是否接受放射治疗?  是  否  无该信息
- e. 病人目前是否接受化疗?  是  否  无该信息

D27. 抑郁或焦虑症  是  否  无该信息

D28. 糖尿病  是  否  无该信息

D28a. 发病年龄: \_\_\_\_\_

D28b. 病人是否使用胰岛素?  是  否  无该信息

D28c. [如果是女性且发病年龄<45岁, 问:] 病人是否只是在怀孕期间有糖尿病 (妊娠糖尿病)?  是  否  无该信息

D29. 神经系统疾病  是  否  无该信息

D29a. 癫痫  是  否  无该信息

D29b. 任何癫痫发作  是  否  无该信息

D29c. 帕金森病  是  否  无该信息

D30. 骨性关节炎  是  否  无该信息

D31. 系统性红斑狼疮  是  否  无该信息

D32. 风湿性关节炎  是  否  无该信息

D33. 其他自身免疫性疾病, 请注明  是  否  无该信息

D33a. 请注明其他自身免疫性疾病: \_\_\_\_\_

D34. 消化系统疾病 (如食管、胃、肠)  是  否  无该信息

D35. 甲状腺功能减退  是  否  无该信息

D36. 皮肤疾病如湿疹  是  否  无该信息

D37. 其他疾病, 请注明  是  否  无该信息

D37a. 请注明其他疾病: \_\_\_\_\_

D38. 在纳入之前的十二个月中是否住过院  是  否  无该信息

D38a. [D38选择是] 呼吸系统相关病症?  是  否  无该信息

## E. 疫苗史

E1. 是否记录了疫苗接种史?  是  否 → 跳至F

### 季节性流感疫苗

E2. 病人是否在2015年10月到2016年2月之间接种过季节性流感疫苗?  
 是  
 否 → 跳至E9  
 无该信息 → 跳至E9

E3. 日期: \_\_\_\_/\_\_\_\_/\_\_\_\_ (年/月/日)  无该信息

E4. 流感疫苗的类型?  灭活(注射)  不清楚

如果可能的话, 请提供季节性流感疫苗接种提供方信息(名称、地址、电话和邮箱)。

E5. 名称: \_\_\_\_\_  无该信息

E6. 地址: \_\_\_\_\_  无该信息

E7. 电话: \_\_\_\_\_  无该信息

E8. 邮箱: \_\_\_\_\_  无该信息

### 上一年季节性流感疫苗接种情况

E9. 病人是否在去年接种过季节性流感疫苗, 从2014年10月到2015年2月?  
 是  
 否 → 跳至F  
 无该信息 → 跳至F

E10. 日期: \_\_\_\_/\_\_\_\_/\_\_\_\_ (年/月/日)  无该信息

E11. 流感疫苗的种类?  灭活(注射)  不清楚

如果可能的话，请提供季节性流感疫苗接种提供方信息（名称、地址、电话和邮箱）。

- E12. 名称: \_\_\_\_\_  无该信息  
E13. 地址: \_\_\_\_\_  无该信息  
E14. 电话: \_\_\_\_\_  无该信息  
E15. 邮箱: \_\_\_\_\_  无该信息

## F. 住院前治疗

F1. 病人在住院前是否接受过门诊治疗（不包括最终导致住院的急诊）？

- 是  否 → 跳至下一部分 G  无该信息 → 跳至下一部分 G

F2. [如果选是] 病人在入院前是否服用过任何流感抗病毒药物？

- 是  否  无该信息

a. 请注明抗病毒药物：

- 奥塞米韦（达菲）  
 扎那米韦  
 拉米韦  
 三环葵胺  
 金刚烷乙胺  
 无该信息

b. 给药途径: \_\_\_\_\_  无该信息

c. 开始日期: \_\_\_\_/\_\_\_\_/\_\_\_\_ (年/月/日)  无该信息

d. 结束日期: \_\_\_\_/\_\_\_\_/\_\_\_\_ (年/月/日)  无该信息

F3. [如果选是] 病人在入院前是否服用过任何抗生素？

- 是  否  无该信息

a. 抗生素 1: \_\_\_\_\_  无该信息

b. 给药途径: \_\_\_\_\_  无该信息

c. 开始日期: \_\_\_\_/\_\_\_\_/\_\_\_\_ (年/月/日)  无该信息

d. 截止日期: \_\_\_\_/\_\_\_\_/\_\_\_\_ (年/月/日)  无该信息

e. 抗生素 2: \_\_\_\_\_  无该信息

f. 给药途径: \_\_\_\_\_  无该信息

g. 开始日期: \_\_\_\_/\_\_\_\_/\_\_\_\_ (年/月/日)  无该信息

h. 截止日期: \_\_\_\_/\_\_\_\_/\_\_\_\_ (年/月/日)  无该信息

F4. [如果选是] 病人在入院前是否服用过他汀类药物？

- 是  否  无该信息

a. 请注明: \_\_\_\_\_  无该信息

b. 给药途径: \_\_\_\_\_  无该信息

c. 开始日期: \_\_\_\_/\_\_\_\_/\_\_\_\_ (年/月/日)  无该信息

d. 截止日期: \_\_\_\_/\_\_\_\_/\_\_\_\_ (年/月/日)  无该信息

F5. [如果选是] 病人在入院前是否服用过激素类药物？

- 是  否  无该信息

a. 请注明: \_\_\_\_\_  无该信息

- b. 给药途径: \_\_\_\_\_  无该信息  
c. 开始日期: \_\_\_\_/\_\_\_\_/\_\_\_\_ (年/月/日)  无该信息  
d. 截止日期: \_\_\_\_/\_\_\_\_/\_\_\_\_ (年/月/日)  无该信息

## G. 医院和入院信息

- G1. 入院日期: \_\_\_\_/\_\_\_\_/\_\_\_\_ (年/月/日)  无该信息  
G2. 入院时间: \_\_\_\_:\_\_\_\_ 小时:分钟  无该信息  
G3. 医院名称: \_\_\_\_\_  无该信息  
G4. 病人是否从另一家医院转介或者急症入院? [不包括护理/照护机构 (SNF 或 SNIF)]  
 是  否  无该信息  
G4a. [如果选是] (其他医院)入院日期: \_\_\_\_/\_\_\_\_/\_\_\_\_ (年/月/日)  无该信息

## H. 临床评定和分诊时生命体征

- F1. 体温 (°C): \_\_\_\_\_  无该信息  
F2. 心率 (次/分): \_\_\_\_\_  无该信息  
F3. 心脏收缩压 (SBP)/舒张压 (DBP): \_\_\_\_/\_\_\_\_  无该信息  
F4. 是否使用氧气治疗?  
[如果选是]  
F4a.i 血氧饱和度: \_\_\_\_\_ %  
F4a.ii 吸入氧气浓度: \_\_\_\_ L  
[如果选否]  
F4b.吸入氧气浓度: \_\_\_\_\_ % (室内空气氧气浓度)  
F5. 入院时的体重 (公斤/kg): \_\_\_\_\_  无该信息  
F6. 入院时的身高 (厘米/cm): \_\_\_\_\_  无该信息

## I. 住院期间治疗

- I1. 病人是否需要进入重症监护室?  是  否  无该信息  
a. [如果选是] 进入重症监护室的日期: \_\_\_\_/\_\_\_\_/\_\_\_\_ (年/月/日)  无该信息  
b. [如果选是] 离开重症监护室的日期: \_\_\_\_/\_\_\_\_/\_\_\_\_ (年/月/日)  无该信息  
I2. 病人是否使用呼吸机辅助通气?  是  否  无该信息

- a. [如果选是] 开始日期/插管时间: \_\_\_\_/\_\_\_\_/\_\_\_\_ (年/月/日)  无该信息
- b. [如果选是] 停止日期: \_\_\_\_/\_\_\_\_/\_\_\_\_ (年/月/日)  无该信息
- c. [如果选否] 是否有氧气支持的记录?  是  否  无该信息
- I3. 病人是否在住院期间接受过药物治疗?  是  否  无该信息
- I4. [如果选是] 病人在住院期间是否服用过任何流感抗病毒药物?  
 是  否  无该信息
- a. 请注明抗病毒药物:  
 奥塞米韦 (达菲)  
 扎那米韦  
 拉米韦  
 三环葵胺  
 金刚烷乙胺  
 无该信息
- b. 给药途径: \_\_\_\_\_  无该信息
- c. 开始日期: \_\_\_\_/\_\_\_\_/\_\_\_\_ (年/月/日)  无该信息  
 结束日期: \_\_\_\_/\_\_\_\_/\_\_\_\_ (年/月/日)  无该信息
- I5. [如果选是] 病人在住院期间是否服用过任何抗生素?  
 是  否  无该信息
- a. 抗生素 1: \_\_\_\_\_  无该信息
- b. 给药途径: \_\_\_\_\_  无该信息
- c. 开始日期: \_\_\_\_/\_\_\_\_/\_\_\_\_ (年/月/日)  无该信息
- d. 截止日期: \_\_\_\_/\_\_\_\_/\_\_\_\_ (年/月/日)  无该信息
- e. 抗生素 2: \_\_\_\_\_  无该信息
- f. 给药途径: \_\_\_\_\_  无该信息
- g. 开始日期: \_\_\_\_/\_\_\_\_/\_\_\_\_ (年/月/日)  无该信息
- h. 截止日期: \_\_\_\_/\_\_\_\_/\_\_\_\_ (年/月/日)  无该信息
- i. 抗生素 3: \_\_\_\_\_  无该信息
- j. 给药途径: \_\_\_\_\_  无该信息
- k. 开始日期: \_\_\_\_/\_\_\_\_/\_\_\_\_ (年/月/日)  无该信息
- l. 截止日期: \_\_\_\_/\_\_\_\_/\_\_\_\_ (年/月/日)  不适
- I6. [如果选是] 病人在住院期间服用过他汀类药物? (降脂类药)  
 是  否  无该信息
- a. 请注明: \_\_\_\_\_  无该信息
- b. 给药途径: \_\_\_\_\_  无该信息
- c. 开始日期: \_\_\_\_/\_\_\_\_/\_\_\_\_ (年/月/日)  无该信息
- d. 截止日期: \_\_\_\_/\_\_\_\_/\_\_\_\_ (年/月/日)  无该信息
- I7. [如果选是] 病人在住院期间是否使用过激素治疗?  
 是  否  无该信息
- a. 请注明: \_\_\_\_\_  无该信息
- b. 给药途径: \_\_\_\_\_  无该信息
- c. 开始日期: \_\_\_\_/\_\_\_\_/\_\_\_\_ (年/月/日)  无该信息
- d. 截止日期: \_\_\_\_/\_\_\_\_/\_\_\_\_ (年/月/日)  无该信息

## J. 流感实验室检测

1. 样本的采集是用于临床目的吗（鼻拭子和咽拭子；只有鼻拭子；只有喉拭子；鼻咽拭子，BAL，ET [如果病人插管]，洗/吸鼻或混合样本）？

- 是，用于临床目的  
 未采临床目的样本 → 跳至下一部分  
 无该信息 → 跳至下一部分

[如果是用于临床目的的样本采集，] 根据临床样本提供流感测试的结果。

[注意：用于临床目的，收集最多 4 次流感测试样本的数据]

| 流感测试结果                  |                                                  |                                                               |                                            |                               |                                            |                                    |
|-------------------------|--------------------------------------------------|---------------------------------------------------------------|--------------------------------------------|-------------------------------|--------------------------------------------|------------------------------------|
| J2. 测试 1:               | <input type="checkbox"/> 核酸检测/分子学方法，在 J2_1.a 中注明 | <input type="checkbox"/> 病毒培养<br><input type="checkbox"/> 多通道 | <input type="checkbox"/> 快速检测，在 J2_1.a 中注明 | <input type="checkbox"/> 荧光抗体 | <input type="checkbox"/> 其他测试，在 J2_1.a 中注明 | <input type="checkbox"/> 未知方法/只需记录 |
| J3. 注明方法/程序/过程代码:       | _____                                            |                                                               | J2a. 请注明: _____                            |                               |                                            |                                    |
| J4. 结果:                 | <input type="checkbox"/> Flu A (未区分亚型)           | <input type="checkbox"/> Flu B                                | <input type="checkbox"/> Flu A & B         |                               | <input type="checkbox"/> Flu A/B (未区分具体类型) |                                    |
|                         | <input type="checkbox"/> 2009 H1N1               | <input type="checkbox"/> H1, 季节性的                             | <input type="checkbox"/> H1, 未注明的          | <input type="checkbox"/> H3   | <input type="checkbox"/> H5                |                                    |
|                         | <input type="checkbox"/> H7N9                    | <input type="checkbox"/> Flu A, 无法区分亚型                        |                                            |                               |                                            |                                    |
|                         | <input type="checkbox"/> 阴性                      | <input type="checkbox"/> 其他,<br>a. 请注明: _____                 |                                            |                               |                                            |                                    |
| J5. 样本采集日期:<br>__/__/__ | J6. 测试机构 ID:<br>_____                            |                                                               |                                            | J7. 样本 ID:<br>_____           |                                            |                                    |
| J8. CT 值: _____         |                                                  |                                                               | J9. 定量结果: _____                            |                               |                                            |                                    |

(编程注意：如果J2. 测试1= 快速，在k2a注明，之后J4的选项只有Flu A, Flu B, Flu A & B, Flu A/B (未区分具体类型)和阴性。

## K. 临床微生物检测结果

K1. 从入院 72 小时内的实验室检测中收集所有可以获取的细菌和真菌的培养结果（如：培养日期、培养时间、病原体判定、病原体来源的鉴定等）。是否进行了临床微生物检测？

- 是  
 否 → 转至 K2  
 无该信息 → 转至 K2

| 细菌和真菌的病原体 - 无菌或只有呼吸道 |                                                                                                                                                                          |                                       |
|----------------------|--------------------------------------------------------------------------------------------------------------------------------------------------------------------------|---------------------------------------|
| 培养检测样本               | 培养检测部位                                                                                                                                                                   | 所有可得数据（包括找到的病原体）                      |
| a. 样本 1              | <input type="checkbox"/> 痰<br><input type="checkbox"/> 血<br><input type="checkbox"/> CSF<br><input type="checkbox"/> 胸腔积液<br><input type="checkbox"/> 其他体内无菌部位，请注明：_____ | K1a.i: _____                          |
|                      |                                                                                                                                                                          | <input type="checkbox"/> 无该信息 → 转至 K2 |
| b. 样本 2              | <input type="checkbox"/> 痰<br><input type="checkbox"/> 血<br><input type="checkbox"/> CSF<br><input type="checkbox"/> 胸腔积液<br><input type="checkbox"/> 其他体内无菌部位，请注明：_____ | K1b.i: _____                          |
|                      |                                                                                                                                                                          | <input type="checkbox"/> 无该信息 → 转至 K2 |
| c. 样本 3              | <input type="checkbox"/> 痰<br><input type="checkbox"/> 血<br><input type="checkbox"/> CSF<br><input type="checkbox"/> 胸腔积液<br><input type="checkbox"/> 其他体内无菌部位，请注明：_____ | K1c.i: _____                          |
|                      |                                                                                                                                                                          | <input type="checkbox"/> 无该信息 → 转至 K2 |

K2. 从入院 72 小时内的测试中收集所有可以获取的病毒学检测结果（如：毒性病原体 [RSV、腺病毒、副流感病毒、人类偏肺病毒、鼻病毒，冠状病毒，巨细胞病毒，肠道病毒等]，CT 值、测试结果、测试日期）。是否进行了病毒学检测？

- 是  
 否 → 转至下一部分 L  
 无该信息 → 转至下一部分 L

| 病毒性病原体   |                                          |
|----------|------------------------------------------|
| 病毒性病原体   | 所有可得数据                                   |
| a. 病原体 1 |                                          |
|          | <input type="checkbox"/> 无该信息 → 转至下一部分 L |

|          |                                          |
|----------|------------------------------------------|
| b. 病原体 2 |                                          |
|          | <input type="checkbox"/> 无该信息 → 转至下一部分 L |
| c. 病原体 3 |                                          |
|          | <input type="checkbox"/> 无该信息 → 转至下一部分 L |
| d. 病原体 4 |                                          |
|          | <input type="checkbox"/> 无该信息 → 转至下一部分 L |
| e. 病原体 5 |                                          |
|          | <input type="checkbox"/> 无该信息 → 转至下一部分 L |

## L. 胸部 X 线摄影

| 胸部 X 光片 - 仅根据影像学报告                      |                                    |                                        |  |
|-----------------------------------------|------------------------------------|----------------------------------------|--|
| L1. 胸部 X 片是在入院后 48 小时内进行的吗?             | <input type="checkbox"/> 是         | <input type="checkbox"/> 否 跳至下一部分      |  |
| L2. 胸片是否异常?                             | <input type="checkbox"/> 是         | <input type="checkbox"/> 否<br>跳至 L6    |  |
| L3. 第一次胸片报告异常的日期:                       | ___/___/___                        |                                        |  |
| L4. 对于第一次报告胸片异常, 请勾选出以下所有适用选项:          |                                    |                                        |  |
| a. <input type="checkbox"/> 没有报告        | b. <input type="checkbox"/> 肺实变    | c. <input type="checkbox"/> 间质浸润       |  |
| d. <input type="checkbox"/> 气腔密度增大/占位病变 | e. <input type="checkbox"/> 肺不张    | f. <input type="checkbox"/> 胸腔积液/积脓    |  |
| g. <input type="checkbox"/> 支气管肺炎/肺炎    | h. <input type="checkbox"/> 空洞     | i. <input type="checkbox"/> 肺叶(不是间质)浸润 |  |
| j. <input type="checkbox"/> 不能排除肺炎      | k. <input type="checkbox"/> 其他:    | l. 请注明: _____                          |  |
| L5. 请注明支气管肺炎/肺炎/强造影/浸润的部位:              |                                    |                                        |  |
| <input type="checkbox"/> 单叶             | <input type="checkbox"/> 多页浸润 (单边) | <input type="checkbox"/> 多页浸润 (双边)     |  |

L6. 是否有影像学家确证?  是  否  不清楚

## M. 病人出院

M1. 结果:

- 存活 → 继续 M2  
 死亡 → 跳至 M6  
 不清楚 → 继续 M2



M2. 出院到:

- 家
- 疗养院
- 康复机构
- 家 (需要提供上门医疗保健服务)
- 安养院 (临终关怀机构)
- 其他医院
- 其他, 请注明: \_\_\_\_\_
- 依旧住院 (未出院)
- 没有资料

M3. 出院日期: \_\_\_\_/\_\_\_\_/\_\_\_\_ (年/月/日)  无该信息

M4. 主要的出院诊断[ICD-9/ICD-10]: .  无该信息

M5. **按照顺序**列出出院诊断 ([ICD-9/ICD-10] 代码):

1. .
2. .
3. .
4. .
5. .
6. .
7. .
8. .
9. .
10. .
11. .
12. .
13. .
14. .
15. .
16. .
17. .
18. .
19. .
20. .

M5a. 如果没有 ICD-9/ICD-10 代码, 请写下最主要的, 然后再写下次要的出院诊断。

|         |
|---------|
| 主要出院诊断: |
| 次要出院诊断: |

M6. 如果病人在住院期间死亡: 死亡日期: \_\_\_\_/\_\_\_\_/\_\_\_\_ (年/月/日)  无该信息

## N. 结束采集

N1 停止采集时间: \_\_:\_\_

# 附录八： 症状筛查表

## 附录八： 症状筛查表

### A. 初始数据管理

A1. 日期: \_\_\_\_/\_\_\_\_/\_\_\_\_ (年/月/日)

A2. 电话调查员姓名: \_\_\_\_\_

A2a. 电话调查员编号: \_\_\_\_ \_

A3. 研究对象所在城市:

苏州

盐城

A4. 信息收集方法 (选择所有适用选项)

电话调查员打电话给研究对象

研究对象打电话给电话调查员

现场调查员与研究对象面对面交流

其他, 请注明 \_\_\_\_\_

### B. 症状筛查

B1. 您从什么时候开始感到不适? \_\_\_\_/\_\_\_\_/\_\_\_\_(年/月/日)

B1\_calc. 自发病日开始计算: \_\_\_\_

B2. 自从感到不适后, 您是否出现以下新症状 (共 7 个症状)?

电话调查员注意: 仅记录急性呼吸道感染或新出现的症状。例如, 咳嗽是指新出现的症状, 而不是与急性疾病无关的长期病患者的咳嗽。对于长期咳嗽的病人, 只有当研究对象的慢性咳嗽症状出现急性加重时, 才可被当作新症状并被记录。

发烧→请回答 B2a

B2a. 发烧, 请注明:

感觉发热

寒颤

测量体温等于或高于 37.8 摄氏度

流鼻涕

呼吸急促加重

- 喉咙痛
- 咳嗽
- 身体疼痛或肌肉酸痛
- 头痛

程序编制注意：问卷会依据以下 4 种情况而自动运行至：

- 若患者发病不超过 7 天，并且出现至少 2 项（在 B2 中提及的）呼吸道症状，请回答 B3。
- 若患者出现至少 2 项呼吸道症状，但发病已经超过 7 天，请回答 B4。
- 若患者发病在 7 天内，但没有或仅有一种呼吸道症状出现时，则说：“我们正在寻找出现症状列表中至少 2 项呼吸道症状的患者。若您感到不适及出现这些症状时，请再次电话联系我们。我们也会在明天或者后天和您电话联系跟进您的状况。”
- 若患者没有出现任何呼吸道症状，并发病已经超过 7 天，则说：“我们特意寻找出现症状列表中任何呼吸道症状的患者，并且发病不超过 7 天。若您开始感到不适并出现以上这些呼吸道症状时，请与我们的电话调查员联系。”

B3. 电话调查员：是否已经安排时间做家访？

- 否 → 请回答 B3a
- 是 → 请回答 B4

B3a. 是否计划今天晚些时候或者明天与研究对象联系确认家访时间？

- 否 → 注意：关于下一步操作请联系上级。
- 是 → 请回答 B4

B4. 截至今天，您是否仍然感到不舒服？

- 否 → 请回答 B4a
- 是 → 注意：继续或另外预约时间完成急性疾病访谈表。

B4a. 疾病结束日期：\_\_\_\_/\_\_\_\_/\_\_\_\_（年/月/日）

注意：如果发病时间在 9 天之内（包含 9 天），继续或另外预约时间完成急性疾病访谈表。如果发病时间在 9 天以外，继续或另外预约时间疾病恢复访谈表。不需完成急性疾病访谈表。

附录九：  
急性疾病访谈表

## 附录九：急性疾病访谈表

### A. 初始数据管理

A1. 日期: \_\_\_\_/\_\_\_\_/\_\_\_\_ (年/月/日)

A2. 访谈员姓名: \_\_\_\_\_

A2a. 访谈员编号: \_\_\_\_

A3. 研究对象所在城市:

苏州

盐城

A4. 信息收集方法 (选择所有适用选项)

电话

面对面交流

其他, 请注明→ A4a

A4a.其他信息收集方法, 请注明: : \_\_\_\_\_

A5. 症状开始日期: \_\_\_\_/\_\_\_\_/\_\_\_\_ (年/月/日)

A5\_calc. 自发病日开始计算: \_\_\_\_

您好, [参与者姓名], 我叫 XXX, 是[研究地点][研究项目名]的工作人员, 现在想了解一下您的新发疾病。你在 XX 年 XX 月参与了我们的研究, 现在是研究的 XX 阶段, 我有一些问题想问您。我们这次的谈话会在 10 分钟内结束, 请问现在方便进行吗?

如果参与者不确定你为什么打给他/她:

说: 您在 XX 年 XX 月参与了一个研究, 研究是关于 XX 地区 60 岁及以上老年人的流感疾病情况, 这次电话访谈主要是问几个关于您疾病的问题。

如果参与者表明现在不方便进行电话访谈:

说: 谢谢。下次是否有适宜的时间重新打过来进行电话访谈?

如果回答是, 在研究追踪系统上记录好日期和时间, 感谢参与者, 提醒参与者他们可以随时退出研究, 以及你会在安排好的时间里打回来。

如果回答不是, 感谢参与者, 过几天再打过来。结束电话访谈。

如果参与者指出现在方便进行电话访谈, 继续以下访谈内容:

说: 谢谢, 稍作提醒, 你可以在任何时候退出研究或者拒绝回答任何问题。

请继续回答问题 B1。

## B. 疾病背景

B1. 到今天为止，您是否仍然感觉到不舒服？

否 → B1a

是 → B2

B1a. 疾病结束日期 \_\_\_\_/\_\_\_\_/\_\_\_\_ (年/月/日)

*[程序编制注意：本表可容纳自发病起计长达 9 天的每天疾病报告。第 9 日之后，跟进访谈是一个较为合适的方法获取急性疾病史。]*

B2. 在您发病前 7 日内，您的家庭成员是否患过类似的病症？

否 → C 部分：症状及严重程度

是 → B2a

B2a. 在您发病前 7 日内，您有多少个家庭成员患过类似的病症？

1

2

3

4

5 或以上

B2b. 患过类似疾病的家庭成员年龄为？

*[程序编制注意：电脑会根据 B2a 的答案显示最多为 5 个家庭成员的选项。如果多于 5 个家庭成员有过类似的病症，家访调查员应该依次记录最年轻的家庭成员。]*

B2b\_i. 家庭成员年龄 1: \_\_\_\_ (岁)

B2b\_ii. 家庭成员年龄 2: \_\_\_\_ (岁)

B2b\_iii. 家庭成员年龄 3: \_\_\_\_ (岁)

B2b\_iv. 家庭成员年龄 4: \_\_\_\_ (岁)

B2b\_v. 家庭成员年龄 5: \_\_\_\_ (岁)

## C. 症状及严重程度

访谈员说：“接下来，我想问在过去的 24 小时内，您是否曾出现过以下症状？如果是，这些症状的严重程度分别是？您是否曾有过…？”（给出答题卡 C1-20）

|                 | 是否出现<br>以下症状? |                          | 请描述症状的严重程度?              |       |                          |                          |                          |
|-----------------|---------------|--------------------------|--------------------------|-------|--------------------------|--------------------------|--------------------------|
|                 | 否<br>=0       | 是<br>=1                  | 轻微<br>=1                 | 中度 =2 | 严重 =3                    |                          |                          |
| 发烧或感到发热         | C1.           | <input type="checkbox"/> | <input type="checkbox"/> | C1a.  | <input type="checkbox"/> | <input type="checkbox"/> | <input type="checkbox"/> |
| 寒颤              | C2.           | <input type="checkbox"/> | <input type="checkbox"/> | C2a.  | <input type="checkbox"/> | <input type="checkbox"/> | <input type="checkbox"/> |
| 打喷嚏             | C3.           | <input type="checkbox"/> | <input type="checkbox"/> | C3a.  | <input type="checkbox"/> | <input type="checkbox"/> | <input type="checkbox"/> |
| 流鼻涕或鼻塞          | C4.           | <input type="checkbox"/> | <input type="checkbox"/> | C4a.  | <input type="checkbox"/> | <input type="checkbox"/> | <input type="checkbox"/> |
| 呼吸急促加重<br>或呼吸困难 | C5.           | <input type="checkbox"/> | <input type="checkbox"/> | C5a.  | <input type="checkbox"/> | <input type="checkbox"/> | <input type="checkbox"/> |
| 呼吸时感到痛楚         | C6.           | <input type="checkbox"/> | <input type="checkbox"/> | C6a.  | <input type="checkbox"/> | <input type="checkbox"/> | <input type="checkbox"/> |
| 气喘              | C7.           | <input type="checkbox"/> | <input type="checkbox"/> | C7a.  | <input type="checkbox"/> | <input type="checkbox"/> | <input type="checkbox"/> |
| (咳)痰            | C8.           | <input type="checkbox"/> | <input type="checkbox"/> | C8a.  | <input type="checkbox"/> | <input type="checkbox"/> | <input type="checkbox"/> |
| 喉咙痛             | C9.           | <input type="checkbox"/> | <input type="checkbox"/> | C9a.  | <input type="checkbox"/> | <input type="checkbox"/> | <input type="checkbox"/> |
| 咳嗽              | C10.          | <input type="checkbox"/> | <input type="checkbox"/> | C10a. | <input type="checkbox"/> | <input type="checkbox"/> | <input type="checkbox"/> |
| 身体疼痛            | C11.          | <input type="checkbox"/> | <input type="checkbox"/> | C11a. | <input type="checkbox"/> | <input type="checkbox"/> | <input type="checkbox"/> |
| 疲惫              | C12.          | <input type="checkbox"/> | <input type="checkbox"/> | C12a. | <input type="checkbox"/> | <input type="checkbox"/> | <input type="checkbox"/> |
| 头痛              | C13.          | <input type="checkbox"/> | <input type="checkbox"/> | C13a. | <input type="checkbox"/> | <input type="checkbox"/> | <input type="checkbox"/> |
| 注意力难以集中         | C14.          | <input type="checkbox"/> | <input type="checkbox"/> | C14a. | <input type="checkbox"/> | <input type="checkbox"/> | <input type="checkbox"/> |
| 感到困惑            | C15.          | <input type="checkbox"/> | <input type="checkbox"/> | C15a. | <input type="checkbox"/> | <input type="checkbox"/> | <input type="checkbox"/> |
| 耳痛              | C16.          | <input type="checkbox"/> | <input type="checkbox"/> | C16a. | <input type="checkbox"/> | <input type="checkbox"/> | <input type="checkbox"/> |
| 恶心              | C17.          | <input type="checkbox"/> | <input type="checkbox"/> | C17a. | <input type="checkbox"/> | <input type="checkbox"/> | <input type="checkbox"/> |
| 呕吐              | C18.          | <input type="checkbox"/> | <input type="checkbox"/> | C18a. | <input type="checkbox"/> | <input type="checkbox"/> | <input type="checkbox"/> |
| 腹泻              | C19.          | <input type="checkbox"/> | <input type="checkbox"/> | C19a. | <input type="checkbox"/> | <input type="checkbox"/> | <input type="checkbox"/> |
| 食欲不振            | C20.          | <input type="checkbox"/> | <input type="checkbox"/> | C20a. | <input type="checkbox"/> | <input type="checkbox"/> | <input type="checkbox"/> |

[程序编制注意：当症状出现被记作“1”时，严重程度选项框才会出现。]



C21. 访谈员说：“由于疾病有时候会影响记性，我将会说出 3 样事物，当我说完时，我想您重复一遍。请记住它们，因为我会几分钟后再次让您重复说出它们。”

说：[每相隔一秒钟缓慢地说出]：“钥匙，旗子，树木。”

C21a. 说：“请重复这 3 个词语。”

访谈员：这位老年人是否正确地重复这 3 个词语？

- 是 → 若 C1 选“是”跳转到 C22；若 C1 选“否”跳转到 C23  
 否 → C21b

C21b. 说：“让我们再试一次。这些词语是：钥匙，旗子，树木。”然后说：“请您重复这 3 个词语。”

访谈员：研究对象是否正确地重复这 3 个词语？

- 是 → 若 C1 选“是”跳转到 C22；若 C1 选“否”跳转到 C23  
 否 → C21c

C21c. 说：“让我们再试一次。这些词语是：钥匙，旗子，树木。”然后说：“请您重复这 3 个词语。”

访谈员：研究对象是否正确地重复这 3 个词语？

- 是 → 若 C1 选“是”跳转到 C22；若 C1 选“否”跳转到 C23  
 否 → 若 C1 选“是”跳转到 C22；若 C1 选“否”跳转到 C23

[提醒：D3 问题要求第二次重复三个词语间隔大约两分钟]

C22. [若 C1 选“是”= 1，请回答 C22；若 C2 选“否”=0，请回答 C23] 当您感到身体发热时候，您有用体温计测量过您的体温吗？

- 否 → C22b       是 → C22a

C22a. 在您这次生病时曾记录的最高体温是？（保留一位小数，如 37.2）  
\_\_ . \_\_ 摄氏度 → 继续回答 C22b

不清楚

C22b. 您是否服用过退烧药如阿司匹林或扑热息痛？

- 否       是

C23. 为了帮助您更好地描述您今天的身体状况，我们给出一个像温度计一样有刻度的评分量表[给出答题卡 C23]。您可以将最佳的身体状况想象成最

顶端的 100 分，最差的身体状况想象成最低端的 0 分。请在 0 至 100 的评分量表上划线描述您今天的身体状况。<sup>59</sup> (给出参与者答题卡 C23 和笔)

家访调查员记录数值： \_\_\_ \_ \_

(0=最差的健康状态；100=最好的健康状态)

## D. 医疗保健

D1. 您曾否因为这次生病看过医生或其他医学专家？

否  是 → D1a

D1a. 您是从哪里得到治疗？ [家访调查员：本题为开放式问题，请为研究对象所给的答案分类]

普通科门诊

急诊室

住院 → 完成 D1b

其他，请注明： \_\_\_\_\_

D1b. 医院名称： \_\_\_\_\_

D1b\_i. 入院日期： \_\_\_\_/\_\_\_\_/\_\_\_\_  
(年/月/日)

D1b\_ii. 出院日期： \_\_\_\_/\_\_\_\_/\_\_\_\_  
(年/月/日)

D2. 您是否因这次患病曾吃过处方药物，如抗生素或抗病毒类药物？

否  是 → D2a

D2a. 您吃过哪些处方类药物？

抗生素药

抗病毒药（奥塞米韦/达菲）

您曾因这次患病服用过其他处方类药物，请注明：

D2a\_i. 您曾因这次患病服用过其他处方类药物，请注明： \_\_\_\_\_

非处方药/成药

D3. 说：“您还记得您之前重复过的那 3 个词语吗？请您现在重复说一遍？” [访谈员：研究对象能正确地重复说出多少个之前的词语？]

0

<sup>59</sup> This visual analogue scale (VAS) is adapted from the EQ-5D VAS.

- 1
- 2
- 3

## E. 日常活动

E1. 接下来我想知道您这次生病是否对您的日常生活和活动造成影响。这是一个从 0%至 100%的评分量表[给出答题卡 E1]， 100%表示您能够像往常一样进行所有的日常活动及工作， 0%表示您完全无法像往常一样进行所有的日常活动及工作。在您生病这段期间，您能够做到百分之多少的日常活动呢？

访谈员记录百分比： \_ \_ \_

E2. 在您生病这段期间，您有多少天（一天中至少有半天的时间）不得不卧床休息？

- 0
- 1
- 2
- 3
- 4
- 5
- 6
- 7
- 8
- 9
- 10 或更多

## F. 最终数据管理

访谈员说：“非常感谢您宝贵的时间，我们希望您会尽快好起来。过几天我们会电话联系您了解您身体情况。”

访谈员独立完成，不需询问参与者。

F1. 访谈员：研究对象是否能完成症状记录日记？

- 否 →F2
- 是 →F3

F2. 访谈员：研究对象不能够完成症状日记的原因是？

- 视力障碍
- 无法使用双手
- 不明白相关解说

病情过于严重拒绝回答

其他原因拒绝回答，请注明：

F2\_b. 请注明：\_\_\_\_\_

[程序编制注意：系统会显示本表 C 部分的症状及严重程度以帮助家访调查员向研究对象解释如何完成症状日记中今天的部分。]

F3. 访谈员：您是否向研究对象解释清楚如何完成症状日记，并且透过今天的症状以作解释，以及把症状日记交给研究对象之前已经填写好发病天数以及相应的日期？

否 →F3b

是 →F3a

F3a. 访谈员：您认为研究对象对于症状日记的解说理解多少？

极好地理解 → F4

很好地理解 → F3b

能理解 → F3b

稍差理解 → F3b

无法理解 → F3b

F3b. 若有任何意见或疑虑，请注明：

\_\_\_\_\_

[访谈员注意：请完成以下关于您与研究对象互动的问题。]

F4. 访谈员：你之前是否有遇过或采访过这位参与者？

是 → F4a

否 →F5

F4a. 访谈员：与病人的基线调查相比，是否有迹象或证据证明精神状态出现急剧改变？

是

否

不确定

不适用

F5. 访谈员：病人是否很难集中注意力（例如，很容易分心或很难专注于所听到的话）？

在访谈的过程中没有出现过这种情况 → 请回答 F6

在访谈的过程中偶尔出现过这种情况，但很轻微 →请回答 F5a

在访谈的过程中偶尔出现过这种情况，并较为明显 →请回答 F5a

不确定 →请回答 F6

F5a. 访谈员：这种行为举止是否在访谈的过程中出现波动（即反反复复地出现和消失，或严重程度有所增加或减少？

- 是
- 否
- 不确定
- 不适用

F5b. 访谈员：[如果出现这种现象或表现出不正常] 请描述这种行为：

---

---

F6. 访谈员：研究对象的思维是否杂乱无章或语无伦次，例如感觉非常散漫或者出现不相关的回答，不清晰或者不合逻辑的想法，或没有任何预兆地从一个主题跳到另外一个主题？

- 是
- 否
- 不确定
- 不适用

F7. 访谈员：总的来说，请您对这个研究对象的意识水平做出评价？

- 警觉（正常）
- 警惕（超警觉，对环境的刺激过于敏感，很易受惊吓）
- 昏睡（昏昏欲睡，不易被唤醒）
- 昏迷（难以唤醒）→访谈员：“当您遇到关于如何解决研究对象此症状或其他可能遇到的医疗需求的问题时，请向您的导师或研究协调员咨询。”
- 昏迷（无意识）→访谈员：“当您遇到关于如何解决研究对象此症状或其他可能遇到的医疗需求的问题时，请向您的导师或研究协调员咨询。”
- 不确定

#### 访谈员弹出式参考

|    |                                                                                           |
|----|-------------------------------------------------------------------------------------------|
| 昏睡 | 例如：如果某人昏昏欲睡，他基本是清醒并能够说话，但失去注意力。在研究对象能够回答问题前，您可能需要不断重复一个问题几遍。一般情况下访谈会进行得很慢并有一定难度，但可能还是可行的。 |
|----|-------------------------------------------------------------------------------------------|

|    |                                                                   |
|----|-------------------------------------------------------------------|
| 昏迷 | 例如：如果某人是在昏迷状态，唤醒一个昏迷的病人比一个昏睡的病人更加困难。研究对象可能无法回答您的问题，除非您摇晃或拍打他的脸等等。 |
|----|-------------------------------------------------------------------|

F8. 访谈员：是否观测到生病的对象所报告的这些症状？

- 是  
 否

### 答题卡

答题卡 C1-20：症状表

答题卡 C23：体温计式健康量表

答题卡 E1：日常生活与工作评分量表

# 附录十： 疾病恢复访谈表

## 附录十: 疾病恢复访谈表

### A. 初始数据管理 (在访谈进行前完成)

A1. 日期 \_\_\_\_/\_\_\_\_/\_\_\_\_ (年/月/日)

A2. 电话 / 现场调查员姓名: \_\_\_\_\_

A3. 研究对象编号: \_\_\_\_\_

A4. 研究对象是否已完成急性疾病访谈表?

否 → 请回答 A4a

是 → 请回答 A4b

[程序编制注意: 如果研究对象在急性疾病访谈中已被确认康复日期, 他将不会进行此后续研究, 因为所有相关信息已经在急性疾病访谈中完成。]

A4a. 疾病的发病日期是?

\_\_\_\_/\_\_\_\_/\_\_\_\_ (年/月/日) → 请回答 A5

A4b. 急性疾病访谈表是什么时间进行的?

\_\_\_\_/\_\_\_\_/\_\_\_\_ (年/月/日)

A4c. 在急性疾病访谈表中, 研究对象报告了以下哪些症状?

[程序编制注意: 若以下资料能从之前的急性疾病访谈表中自动填充, 便不需要完成此验证。]

A4c1. 发烧或感到发热

A4c2. 寒颤

A4c3. 打喷嚏

A4c4. 流鼻涕或鼻塞

A4c5. 呼吸急促加重或呼吸困难

A4c6. 呼吸痛

A4c7. 气喘

A4c8. (咳)痰

A4c9. 喉咙痛



- A4c10. 咳嗽
- A4c11. 身体疼痛
- A4c12. 疲惫
- A4c13. 头痛
- A4c14. 注意力难以集中
- A4c15. 感到困惑
- A4c16. 耳痛
- A4c17. 恶心
- A4c18. 呕吐
- A4c19. 腹泻
- A4c20. 食欲不振

A5. 信息收集的方法（选择所有适用选项）

- 电话
- 面对面交流
- 其他，请注明→ A5a

A5a. 其他收集信息的方法, 请注明: \_\_\_\_\_

A6. 在之前的访谈中，研究对象有否已经确认疾病已康复？

- 否→ 读出以下话语，然后请从 B1 开始回答
- 是→ 读出以下话语，然后请从 B2 开始回答

您好，[参与者姓名]，我叫 XXX，是[研究地点][研究项目名]的工作人员，现在想了解一下您最近出现不舒服的一些情况。您在 XX 年 XX 月参与了我们的研究，我有一些问题想问您。我们这次的谈话会在 10 分钟内结束，请问现在方便进行吗？

**如果参与者不确定你为什么打给他/她：**

说：您在 XX 年 XX 月参与了一个研究，研究是关于 XX 地区 60 岁及以上老年人的流感疾病情况，这次电话访谈主要是问几个问题，了解关于您最近出现不舒服的一些情况。

**如果参与者表明现在不方便进行电话访谈：**

说：谢谢。下次是否有适宜的时间重新打过来进行电话访谈？

[如果回答是]，在研究追踪系统上记录好日期和时间，感谢参与者，提醒参与者他们可以随时退出研究，以及您将会在安排好的时间里打回来。

[如果回答不是]，感谢参与者，过几天再打过来。结束电话访谈。

如果参与者表明现在方便进行电话访谈，继续以下访谈内容：

说：谢谢，稍作提醒，您可以在任何时候退出研究或者拒绝回答任何问题。

## B. 疾病康复

B1. 我们想知道您是否已经痊愈。您现在是否还感到不适？

否 → 说：“我们很高兴您已经痊愈了。”然后回答 B2

是 → 说：“我们为您身体不适感到抱歉，我们想问几个关于您目前身体状况的问题。”然后回答 C1。

B2. 您最后哪一天感到不适？

\_\_\_\_/\_\_\_\_/\_\_\_\_ (年/月/日)

## C. 症状与其严重程度

C1. [如果 A4=是，参与者完成急性疾病访谈表]在您一开始生病的时候所完成的访谈中，您说您曾有过以下症状。请告诉我们在您生病最严重的时候，这些症状的严重程度是？

[程序编制注意：访谈只会列出在之前 A 部分所显示的症状。]

在您生病最严重的时候，您是如何描述这些症状的严重程度？

轻微 = 1      中度 = 2      严重 = 3

|             |      |                          |                          |                          |
|-------------|------|--------------------------|--------------------------|--------------------------|
| 发烧或感到发热     | C1a. | <input type="checkbox"/> | <input type="checkbox"/> | <input type="checkbox"/> |
| 寒颤          | C1b. | <input type="checkbox"/> | <input type="checkbox"/> | <input type="checkbox"/> |
| 打喷嚏         | C1c. | <input type="checkbox"/> | <input type="checkbox"/> | <input type="checkbox"/> |
| 流鼻涕或鼻塞      | C1d. | <input type="checkbox"/> | <input type="checkbox"/> | <input type="checkbox"/> |
| 呼吸急促加重或呼吸困难 | C1e. | <input type="checkbox"/> | <input type="checkbox"/> | <input type="checkbox"/> |
| 呼吸时感到痛楚     | C1f. | <input type="checkbox"/> | <input type="checkbox"/> | <input type="checkbox"/> |
| 气喘          | C1g. | <input type="checkbox"/> | <input type="checkbox"/> | <input type="checkbox"/> |
| (咳)痰        | C1h. | <input type="checkbox"/> | <input type="checkbox"/> | <input type="checkbox"/> |
| 喉咙痛         | C1i. | <input type="checkbox"/> | <input type="checkbox"/> | <input type="checkbox"/> |

|         |      |                          |                          |                          |
|---------|------|--------------------------|--------------------------|--------------------------|
| 咳嗽      | C1j. | <input type="checkbox"/> | <input type="checkbox"/> | <input type="checkbox"/> |
| 身体疼痛    | C1k. | <input type="checkbox"/> | <input type="checkbox"/> | <input type="checkbox"/> |
| 疲惫      | C1l. | <input type="checkbox"/> | <input type="checkbox"/> | <input type="checkbox"/> |
| 头痛      | C1m. | <input type="checkbox"/> | <input type="checkbox"/> | <input type="checkbox"/> |
| 注意力难以集中 | C1n. | <input type="checkbox"/> | <input type="checkbox"/> | <input type="checkbox"/> |
| 感到困惑    | C1o. | <input type="checkbox"/> | <input type="checkbox"/> | <input type="checkbox"/> |
| 耳痛      | C1p. | <input type="checkbox"/> | <input type="checkbox"/> | <input type="checkbox"/> |
| 恶心      | C1q. | <input type="checkbox"/> | <input type="checkbox"/> | <input type="checkbox"/> |
| 呕吐      | C1r. | <input type="checkbox"/> | <input type="checkbox"/> | <input type="checkbox"/> |
| 腹泻      | C1s. | <input type="checkbox"/> | <input type="checkbox"/> | <input type="checkbox"/> |
| 食欲不振    | C1t. | <input type="checkbox"/> | <input type="checkbox"/> | <input type="checkbox"/> |

C2. 在您生病时的任何时候您是否出现以下症状？如果有，它的严重程度是？

[程序编制注意：访谈只会列出没有报告过的症状或是 C1 中为已完成急性疾病访谈表的研究对象所列出的。]

您是否出现  
以下症状？

请描述症状的严重程度？

否 = 0  
是 = 1

轻微 = 1  
中度 = 2  
严重 = 3

|             |      |                          |                          |       |                          |                          |                          |
|-------------|------|--------------------------|--------------------------|-------|--------------------------|--------------------------|--------------------------|
| 发烧或感到发热     | C2a. | <input type="checkbox"/> | <input type="checkbox"/> | C2a1. | <input type="checkbox"/> | <input type="checkbox"/> | <input type="checkbox"/> |
| 寒颤          | C2b. | <input type="checkbox"/> | <input type="checkbox"/> | C2b1. | <input type="checkbox"/> | <input type="checkbox"/> | <input type="checkbox"/> |
| 打喷嚏         | C2c. | <input type="checkbox"/> | <input type="checkbox"/> | C2c1. | <input type="checkbox"/> | <input type="checkbox"/> | <input type="checkbox"/> |
| 流鼻涕或鼻塞      | C2d. | <input type="checkbox"/> | <input type="checkbox"/> | C2d1. | <input type="checkbox"/> | <input type="checkbox"/> | <input type="checkbox"/> |
| 呼吸急促加重或呼吸困难 | C2e. | <input type="checkbox"/> | <input type="checkbox"/> | C2e1. | <input type="checkbox"/> | <input type="checkbox"/> | <input type="checkbox"/> |
| 呼吸时感到痛楚     | C2f. | <input type="checkbox"/> | <input type="checkbox"/> | C2f1. | <input type="checkbox"/> | <input type="checkbox"/> | <input type="checkbox"/> |
| 气喘          | C2g. | <input type="checkbox"/> | <input type="checkbox"/> | C2g1. | <input type="checkbox"/> | <input type="checkbox"/> | <input type="checkbox"/> |
| (咳)痰        | C2h. | <input type="checkbox"/> | <input type="checkbox"/> | C2h1. | <input type="checkbox"/> | <input type="checkbox"/> | <input type="checkbox"/> |
| 喉咙痛         | C2i. | <input type="checkbox"/> | <input type="checkbox"/> | C2i1. | <input type="checkbox"/> | <input type="checkbox"/> | <input type="checkbox"/> |

|         |      |                          |                          |       |                          |                          |                          |
|---------|------|--------------------------|--------------------------|-------|--------------------------|--------------------------|--------------------------|
| 咳嗽      | C2j. | <input type="checkbox"/> | <input type="checkbox"/> | C2j1. | <input type="checkbox"/> | <input type="checkbox"/> | <input type="checkbox"/> |
| 身体疼痛    | C2k. | <input type="checkbox"/> | <input type="checkbox"/> | C2k1. | <input type="checkbox"/> | <input type="checkbox"/> | <input type="checkbox"/> |
| 疲惫      | C2l. | <input type="checkbox"/> | <input type="checkbox"/> | C2l1. | <input type="checkbox"/> | <input type="checkbox"/> | <input type="checkbox"/> |
| 头痛      | C2m. | <input type="checkbox"/> | <input type="checkbox"/> | C2m1. | <input type="checkbox"/> | <input type="checkbox"/> | <input type="checkbox"/> |
| 注意力难以集中 | C2n. | <input type="checkbox"/> | <input type="checkbox"/> | C2n1. | <input type="checkbox"/> | <input type="checkbox"/> | <input type="checkbox"/> |
| 感到困惑    | C2o. | <input type="checkbox"/> | <input type="checkbox"/> | C2o1. | <input type="checkbox"/> | <input type="checkbox"/> | <input type="checkbox"/> |
| 耳痛      | C2p. | <input type="checkbox"/> | <input type="checkbox"/> | C2p1. | <input type="checkbox"/> | <input type="checkbox"/> | <input type="checkbox"/> |
| 恶心      | C2q. | <input type="checkbox"/> | <input type="checkbox"/> | C2q1. | <input type="checkbox"/> | <input type="checkbox"/> | <input type="checkbox"/> |
| 呕吐      | C2r. | <input type="checkbox"/> | <input type="checkbox"/> | C2r1. | <input type="checkbox"/> | <input type="checkbox"/> | <input type="checkbox"/> |
| 腹泻      | C2s. | <input type="checkbox"/> | <input type="checkbox"/> | C2s1. | <input type="checkbox"/> | <input type="checkbox"/> | <input type="checkbox"/> |
| 食欲不振    | C2t. | <input type="checkbox"/> | <input type="checkbox"/> | C2t1. | <input type="checkbox"/> | <input type="checkbox"/> | <input type="checkbox"/> |

C3. [如果 A4c1 或 C2a (发烧) = 1, 继续回答 C3, 否则请回答 C4] 当您感到身体发热时候, 您曾否用体温计测量您的体温?

否 → C3b  是 → C3a

C3a. 这次生病中您所曾记录的最高体温是?

\_\_ . \_\_ 摄氏度 → 继续回答 C4b

不清楚

C3b. 您是否服用过退烧药如阿司匹林或扑热息痛?

否  是

C4. 为了帮助您更好地描述您今天的身体状况, 我们给出一个像温度计一样有刻度的评分量表[给出评分量表和笔]。您可以将最佳的身体状况想象成最顶端的 100 分, 最差的身体状况想象成最低端的 0 分。请在 0 至 100 的评分量表上划线描述您今天的身体状况。<sup>60</sup>

[注意: 如以会面方式进行访谈, 可以给出评分量表和划线。]

电话 / 现场调查员记录数值: \_\_\_

(0=最差的健康状态; 100=最好的健康状态)

<sup>60</sup> This visual analogue scale (VAS) is adapted from the EQ-5D VAS.

## D. 医疗保健

D1. 您是否曾因为这次生病看过医生或其他医学专家？

否 → D2    是 → D1a

D1a. 您是从哪里得到治疗？ [电话 / 现场调查员：本题为开放式问题，请为研究对象所给的答案分类]

普通门诊

急诊室

住院 → 完成 D1b

其他，请注明： \_\_\_\_\_

D1b. 医院名称: \_\_\_\_\_

D1b\_i. 入院日期: \_\_\_\_\_ / \_\_\_\_\_ / \_\_\_\_\_ (年 / 月 / 日)

D1b\_ii. 出院日期: \_\_\_\_\_ / \_\_\_\_\_ / \_\_\_\_\_ (年 / 月 / 日)

D2. 您是否因这次患病曾吃过处方药物，如抗生素或抗病毒类药物？

否       是 → D2a

D2a. 您吃过哪些处方类药物？

抗生素药

抗病毒药（奥塞米韦/达菲）

您曾因这次患病服用过其他处方类药物，  
请注明： \_\_\_\_\_

非处方药/成药

## E. 日常活动

E1. 接下来我知道这次您生病是否对您的日常生活和活动造成影响。这是一个从 0% 至 100% 的评分量表 [展现出评分量表]，100% 表示您能够像往常一样进行所有的日常活动及工作，0% 表示您完全无法像往常一样进行所有的日常活动及工作。在您生病这段期间，您能够做到百分之多少的日常活动呢？

[注意：如以会面方式进行访谈，可以给出评分量表。]

电话 / 现场调查员记录数值： \_\_\_\_\_

(0% = 不能活动; 100% = 能正常活动)

E2. 在您生病这段期间，您有多少天（一天中至少有半天的时间）不得不卧床休息？

- 0
- 1
- 2
- 3
- 4
- 5
- 6
- 7
- 8
- 9
- 10 或更多

## F. 最终数据管理

F1. 电话 / 现场调查员注意：研究对象的疾病是否在这次访谈之前已治愈？

- 否 →F1a       是 →F1b

F1a: 说：“非常感谢您宝贵的时间。我们希望您会尽快康复。您患病的天数对我们的研究来说非常重要。所以我们会每隔三天打电话给您继续观察您的身体状况，直到您的疾病康复。”

F1b: 说：“非常感谢您宝贵的时间。我们很高兴听到您病情得到好转。下个星期我们会再开始定期给您打电话进行随访。”

# 附录十一： 症状日记

## 附录十一：症状日记

注意：下面是症状日记填写说明。在把症状日记本分发给参与者之前，研究工作人员会填写好症状日记里每一页相对应的日期和星期几。同时，研究工作人员会用采访里的资料填写完成当天的症状日记，以向研究对象说明如何填写症状日记。每个症状不包括在此说明内，但记录每种症状出现与否以及其严重程度的数据都会被记录。



|            |                         |             |
|------------|-------------------------|-------------|
| 星期几: _ _ _ | 日期: _ _ _ _ / _ _ / _ _ | 编号: _ _ _ _ |
|------------|-------------------------|-------------|

你是什么时间填写以下记录? \_ \_ : \_ \_  
 你今天量得的最高体温是? \_ \_ \_ °C

| <u>你今天是否出现这些症状?</u> | <u>若是, 它的严重程度是?</u> |  |  |  |  |
|---------------------|---------------------|--|--|--|--|
|---------------------|---------------------|--|--|--|--|

|              |   |   |    |    |    |
|--------------|---|---|----|----|----|
| 发烧或感到发热      | 否 | 是 | 轻微 | 中度 | 严重 |
| 流鼻涕或鼻塞       | 否 | 是 | 轻微 | 中度 | 严重 |
| 打喷嚏          | 否 | 是 | 轻微 | 中度 | 严重 |
| 气促           | 否 | 是 | 轻微 | 中度 | 严重 |
| 喉咙痛          | 否 | 是 | 轻微 | 中度 | 严重 |
| 咳嗽           | 否 | 是 | 轻微 | 中度 | 严重 |
| 呼吸痛          | 否 | 是 | 轻微 | 中度 | 严重 |
| 身体疼痛         | 否 | 是 | 轻微 | 中度 | 严重 |
| 感到困惑或难以集中注意力 | 否 | 是 | 轻微 | 中度 | 严重 |
| 头痛           | 否 | 是 | 轻微 | 中度 | 严重 |
| 食欲不振         | 否 | 是 | 轻微 | 中度 | 严重 |
| 腹泻           | 否 | 是 | 轻微 | 中度 | 严重 |

# 附录十二： 死亡登记表

## 附录十二： 死亡登记表

### A. 信息管理

A1. 请核对以下信息  已确认

研究对象全名: [自动填充]

出生日期: [自动填充]

性别: [自动填充]

A2. 调查员/摘录者姓名: \_\_\_\_\_

A3. 调查员/摘录员编号: \_\_\_\_\_

A4. 填写死亡登记表日期 \_\_\_\_/\_\_\_\_/\_\_\_\_ (年/月/日)

---

---

[注意: 本节的所有资料将在病历中提取。所有日期会以年/月/日的方式记录。所有时间均采取24小时制以xx:xx的方式记录。]

### B. 一般信息

B1. 协调员是否已确认需要填写死亡登记表?

- 是 → 继续回答 B2  
 否 → 结束这部分答题

B2. 是否有迹象显示研究对象已去世?

- 是 → 请回答 B3  
 否 → 结束这部分答题

B3. 信息来源:

- 试图联系研究对象进行随访  
 与研究对象家人的其他讨论  
 死亡证明  
 医院记录  
 其他, 请注明: \_\_\_\_\_ → 请回答C部分
- } 请回答C部分  
} 跳至D部分

## C. 家庭成员报告

你好，我叫[调查员姓名]。请问你是[研究对象家人姓名]吗？

我来电是为了和你跟进有关[研究对象姓名]的情况。我们为 [研究对象姓名] 的去世深感抱歉。

[研究对象姓名]曾经参与我们有关老年人流感的研究。我们将会将[研究对象姓名]从研究中移除，所以我们不会再打扰到您。在此之前，我们希望通过得知一些关于[研究对象]去世的原因，从而帮助到其他老人家。您愿意抽出 5 分钟回答我们几个简短的问题吗？你的答案能帮助我们研究了解更多和提升老年人的健康。]

调查员：如果家人拒绝回答，请说：“非常感谢您宝贵的时间，我们为您亲人的去世感到很抱歉。”请填写退出研究登记表。

如果家人愿意继续回答，请回答 C1。

C1. 您与[研究对象姓名] 是什么关系？

- 配偶
- 儿子（包括女婿）
- 女儿（包括儿媳）
- 孙子/外孙子
- 孙女/外孙女
- 堂亲/ 表亲
- 其他家人
- 其他非家人
- 上面未列出的其他，请注明： \_\_\_\_\_

C2. [研究对象姓名]在哪里去世？ [调查员：根据对方的答案勾选以下相应类别。]

- 家里/社区
- 诊所/健康中心
- 急诊室
- 其他门诊机构
- 研究医院
- 其他医院
- 其他住院机构
- 其他，请注明： \_\_\_\_\_
- 不清楚
- 拒绝回答

C3. [研究对象姓名]在哪天去世？ \_\_\_\_\_ (年/月/日)

- 不清楚
- 拒绝回答

C4. [研究对象姓名]是否因病去世?

- 是→ 请回答C4a
  - 否
  - 不清楚
  - 拒绝回答
- } 跳至 C5a

C4a. [研究对象姓名]去世前生病了多长时间?

\_\_\_\_\_ 天

C4a\_uk. 不清楚或拒绝回答[研究对象姓名]去世前生病了多长时间。

- 不清楚

C4b. [研究对象姓名]有否在因此病在去世前住院?

- 是
- 否
- 不清楚
- 拒绝回答

C5. 引致[研究对象姓名]去世的原因是?

- 死亡原因 1: \_\_\_\_\_  不清楚  拒绝回答
- 死亡原因 2: \_\_\_\_\_  不清楚  拒绝回答
- 死亡原因 3: \_\_\_\_\_  不清楚  拒绝回答
- 死亡原因 4: \_\_\_\_\_  不清楚  拒绝回答
- 死亡原因 5: \_\_\_\_\_  不清楚  拒绝回答

感谢您回答这些问题。我们为您亲人的去世深感抱歉。我们会把[研究对象姓名]从这个研究中移除，并不会再打扰您。

**[注意：在得知研究对象去世后请记得在接下来的后续安排以及提示中移除研究对象的家人，并填写退出研究登记表。]**

## D. 官方或其他报告

[注意：在本节中没有访谈问题，所有问题均为提取信息。所有日期会以年/月/日的方式记录。所有时间均采用24小时制以xx:xx的方式记录。]

D1. 死亡日期：\_\_\_\_/\_\_\_\_/\_\_\_\_ (年/月/日)  没有记录

D2. 死亡时间：\_\_\_\_:\_\_\_\_ (24 小时制)  没有记录

D3. 研究对象在哪里去世？

家里/社区 → 跳至 D4

诊所/健康中心

急诊室

其他门诊机构

研究医院

其他医院

其他住院机构

跳至 D3a

其他，请注明：\_\_\_\_\_ } 跳至 D4

没有记录

D3a. 研究对象死亡地点的具体机构名称：

\_\_\_\_\_  
 没有记录

D4. 死亡性质：

自然死亡

事故

他杀

原因不明

待定

没有记录

D5. 死亡原因

|                                                                                    |                                                            |
|------------------------------------------------------------------------------------|------------------------------------------------------------|
| 填写直接导致死亡的一系列疾病或情况，包括疾病，损伤或是并发症。请一并填写其潜在的死因，不要只记录最终的事件，例如心脏骤停，呼吸骤停，或是休克。请不要使用缩写。    |                                                            |
| 直接原因<br>(最终直接导致死亡的疾病或情况)                                                           | (由于或作为一个结果：)<br>D5a. _____<br><br>直接死因（直接因为或是由 D5b 引发的结果。） |
|                                                                                    | (由于或作为一个结果：)<br>D5b. _____<br><br>(直接因为或是由 D5c 引发的结果。)     |
| 时间倒序(最近发生的列在最上面)列出一系列的疾病或情况（如有），从而导致于 D5a 所列明的直接死亡原因。最后填写潜在死因（疾病或损伤引发最终直接导致死亡的事件）。 | (由于或作为一个结果：)<br>D5c. _____<br><br>(直接因为或是由 D5d 引发的结果。)     |
|                                                                                    | (由于或作为一个结果：)<br>D5d. _____                                 |
|                                                                                    |                                                            |

D6. 列出任何其他相关的导致死亡但没有引发上述潜在死因的重要情况：

\_\_\_\_\_

没有记录

D7. 是否有进行尸检？

- 是 → 请回答 D7a
- 否
- 没有记录
- } 请回答 D8

D7a. 在完成死亡登记表之前是否能拿到尸检结果？

- 是
- 否
- 没有记录

D8. 为研究对象宣告死亡的医生姓名：  
\_\_\_\_\_  没有记录

D9. 宣告死亡日期 \_\_\_\_/\_\_\_\_/\_\_\_\_ (年/月/日)  没有记录

D10. 宣告死亡时间 \_\_\_\_:\_\_\_\_ (24小时制)  没有记录

D11. 这个事件是否交给法医或验尸官？

- 是
- 否
- 没有记录

D12. 哪位进行死亡记录鉴定？ \_\_\_\_\_  
 没有记录

D12a. 这个人的资质是：

- 鉴定医师（当其他医师宣告死亡原因时，他负责鉴定死亡的原因）
- 宣告以及鉴定医师（负责宣告以及鉴定死亡原因，已在上面列明）
- 医学检查员/验尸官（负责调查或鉴定并确定死亡原因）
- 没有记录

**[注意：在得知研究对象去世后请记得在接下来的后续安排以及提示中移除研究对象的家人，并填写退出研究登记表。]**



附录十三：  
退出研究登记表

## 附录十三：退出研究登记表

注意：仅研究对象退出研究或者死亡时才需要完成此登记表。

### A. 信息管理

A1. 请核对以下信息  已确认

研究对象全名： [自动填充]

出生日期： [自动填充]

性别： [自动填充]

A2. 调查员/摘录者姓名： \_\_\_\_\_

调查员编号： \_\_\_\_

A3. 填写表格日期 \_\_\_\_/\_\_\_\_/\_\_\_\_ (年/月/日)

---

### B. 退出研究确认

B1. 退出研究的类型

- 研究对象请求退出研究
- 家庭成员代表研究对象请求退出研究
- 由于无法取得联系退出研究 → 请回答 B1a
- 去世
- 其他，请注明： \_\_\_\_\_

B1a. 在研究对象退出之前，你尝试过用什么方法与其取得联系？

- 多次尝试联系，拨打主要联系电话
- 多次尝试联系，拨打次要联系电话
- 寄信但没有收到回复
- 拜访研究对象家庭
- 其他，请注明： \_\_\_\_\_

B2. 退出研究日期 \_\_\_\_/\_\_\_\_/\_\_\_\_ (年/月/日)

B3. 退出是否发生在试图预约某个特定的访谈或者进行某个特定的访谈时

- 是 → 请回答 B3a
- 否

B3a. 当时工作人员为研究对象尝试安排哪种随访访谈？

- 纳入者访谈表第一部分
- 纳入者访谈表第二部分
- 主动监测
- 症状筛查表
- 急性疾病访谈表
- 疾病恢复访谈表
- 疾病康复登记表
- 每年健康和功能状态评估表

B4. 是否当工作人员尝试为研究对象安排一次特定的随访血液取样时，研究对象提出退出研究？

- 是 → 请回答 B4a
- 否

B4a. 工作人员尝试为研究对象安排哪个时间点的随访研究？

- 2015 年 10 月-12 月
- 2016 年 4 月-6 月
- 2016 年 10 月-12 月
- 2017 年 4 月-6 月
- 2017 年 10 月-12 月
- 2018 年 4 月-6 月
- 2018 年 10 月-12 月
- 2019 年 4 月-6 月
- 2019 年 10 月-12 月
- 2020 年 4 月-6 月

B5. 研究对象是否因为身体状况恶化或者残疾而退出研究？

- 是 → 请回答 B5a
- 否

B5a. 研究对象退出研究是否发生在以下几种情况之后？

- 急性病
- 慢性病
- 其他，请注明： \_\_\_\_\_

B5b. 研究对象最近 6 个月是否曾因为任何原因住院？

- 是
- 否

|  |                         |                                      |
|--|-------------------------|--------------------------------------|
|  | <b>i. 研究对象在何年何月曾住院？</b> | <b>ii. 研究对象住院的原因是？</b><br>[所有适用选项打勾] |
|--|-------------------------|--------------------------------------|

|                                    |                          |                                                                                                                                                                                                 |
|------------------------------------|--------------------------|-------------------------------------------------------------------------------------------------------------------------------------------------------------------------------------------------|
| <b>B5c.</b>                        | __月 [B5c1]<br>__年 [B5c2] | [B5c3]<br><input type="checkbox"/> 急性呼吸系统疾病<br><input type="checkbox"/> 急性非呼吸系统疾病<br><input type="checkbox"/> 慢性疾病<br><input type="checkbox"/> 损伤或创伤<br><input type="checkbox"/> 其它，请详细说明：_____ |
| <b>B5d.</b>                        | __月[B5d1]<br>__年[B5d2]   | [B5d3]<br><input type="checkbox"/> 急性呼吸系统疾病<br><input type="checkbox"/> 急性非呼吸系统疾病<br><input type="checkbox"/> 慢性疾病<br><input type="checkbox"/> 损伤或创伤<br><input type="checkbox"/> 其它，请详细说明：_____ |
| <b>B5e – f. 将会自动显示最多 4 个最近住院记录</b> |                          |                                                                                                                                                                                                 |

B6. 退出研究的理由： [无需读出选项。选出最佳一项或者多项答案。所有适用选项打勾。]

- 没有时间
- 不想提供呼吸道样本
- 不想提供血液样本
- 对研究不再感兴趣
- 参加研究有负面的经历
- 研究对象病得太重
- 家庭成员反对
- 已搬走
- 经多次尝试也无法取得联系
- 去世
- 其他，请注明： \_\_\_\_\_

B6a. 有关退出研究理由备注

\_\_\_\_\_

附录十四：  
每月住院主动监测表

## 附录十四： 每月住院主动监测表

您好，【参与者姓名】。我叫\_\_\_\_\_，是老年人流感项目在【研究地点】的调查员。我将询问几个有关您最近一个月健康状况的问题。

### A. 管理问题

- A1. 日期：\_\_\_\_\_ (年/月/日)
- A2. 时间：\_\_：\_\_ (小时：分钟)
- A3. 访谈员姓名：\_\_\_\_\_
- A4. 访谈员编号：\_\_\_\_\_
- A5. 你从谁那里获取信息？
- 研究对象本人
  - 研究对象配偶
  - 与研究对象住在一起的其他家庭成员
  - 与研究对象不住在一起的其他家庭成员
  - 其他，请注明：\_\_\_\_\_

### B. 住院问题

- B1. 在过去的1个月里，您是否曾经住院？
- 是 → 转至 B2
  - 否 → 退出表格
  - 拒绝回答 → 退出表格
- B2. 在过去的1个月里，您住过多少次院？
- 1次
  - 2次
  - 3次
  - 4次或更多
- B2a. 住院日期：\_\_\_\_\_ (年/月/日)
- 住院日期不清楚或拒绝回答
- B2b. 出院日期：\_\_\_\_\_ (年/月/日)
- 仍然住院
  - 出院日期不清楚或拒绝回答

B2c. 您住在哪家医院? \_\_\_\_\_ (文字)

B2d. 您住在哪个科室?

- 正规病房(包括内科病房、中医病房、传染病病房、普外科病房等)
- 急诊
- 门诊 (包括村卫生室)
- 其它, 请详细说明: \_\_\_\_\_

B2e. 您当时住院的原因是?

告表)

- 急性呼吸系统疾病 (通知项目协调员准备提取信息以完成住院病例报告表)
- 慢性呼吸系统疾病
- 急性非呼吸系统疾病
- 慢性非呼吸系统疾病
- 损伤或创伤
- 手术, 请详细说明: \_\_\_\_\_ (B2e\_spec.i)
- 其它, 请详细说明: \_\_\_\_\_ (B2e\_spec.ii)

(编程注意: 根据 B2 的答案自动重复生成 B2a 到 B2e 的问题, 最多为 4 次。排序依次为 B2a 到 B2e, B3a 到 B3e, B4a 到 B4e, B5a 到 B5e)
